# Supplementary material
Source: PubMed Central journal article supplement (PMC2851978)

**Golgi Modifying Properties of Macfarlandin E and the Synthesis and Evaluation of its  
Dioxabicyclo[3.2.1]octanone Core**

Supporting Information – Table of Contents

|                                                                                                                                    |                |
|------------------------------------------------------------------------------------------------------------------------------------|----------------|
| <b>Chemical Materials and Methods.....</b>                                                                                         | <b>S2</b>      |
| <b>Experimental Procedures.....</b>                                                                                                | <b>S2-S15</b>  |
| <b>X-ray Structures for 7 and 17.....</b>                                                                                          | <b>S16-S17</b> |
| <b>NMR Assignment of Pyrroles 26, 27, and 28.....</b>                                                                              | <b>S18-S19</b> |
| <b>Fig. S1. Structurally related compounds screened for Macfarlandin E-Type Golgi Activity<br/>.....</b>                           | <b>S20</b>     |
| <b>Fig. S2. The effect of MacE and <i>t</i>-Bu-MacE on other Golgi markers, HeLa cells, and other<br/>cellular structures.....</b> | <b>S21</b>     |
| <b>Fig. S3. MacE and <i>t</i>-Bu-MacE are irreversible .....</b>                                                                   | <b>S22</b>     |
| <b>Fig. S4. MacE and <i>t</i>-Bu-MacE block transport between the Golgi and the plasma<br/>membrane.....</b>                       | <b>S22</b>     |
| <b>Fig. S5. MacE and <i>t</i>-Bu-MacE does not block BFA induced relocalization of Golgi proteins<br/>to the ER.....</b>           | <b>S22</b>     |
| <b><sup>1</sup>H and <sup>13</sup>C NMR Spectra.....</b>                                                                           | <b>S23-S58</b> |

**Chemical Materials and Methods.** Unless stated otherwise, reactions were conducted in oven-dried glassware under an atmosphere of nitrogen or argon using anhydrous solvents (either freshly distilled or passed through activated alumina columns). Titanium(IV) chloride and methylene bromide were purified by distillation. TMEDA, benzylamine,  $\text{BF}_3\text{OEt}_2$  were purified by distillation over  $\text{CaH}_2$ . All other commercially obtained reagents were used as received. Reaction temperatures were controlled using an IKAmag temperature modulator. Thin-layer chromatography (TLC) was conducted with E. Merck silica gel 60 F254 pre-coated plates, (0.25 mm) and visualized by exposure to UV light (254 nm) or stained with anisaldehyde, ceric ammonium molybdate, potassium permanganate and iodine. Flash column chromatography was performed using normal phase silica gel (60 Å, 230-240 mesh, Merck KGA).  $^1\text{H}$  NMR spectra were recorded on Bruker spectrometers (at 500 or 600 MHz) and are reported relative to deuterated solvent signals. Data for  $^1\text{H}$  NMR spectra are reported as follows: chemical shift ( $\delta$  ppm), multiplicity, coupling constant (Hz) and integration.  $^{13}\text{C}$  NMR spectra were recorded on Bruker Spectrometers (at 125 or 150 MHz). Data for  $^{13}\text{C}$  NMR spectra are reported in terms of chemical shift. IR spectra were recorded on a Varian 640-IR spectrometer and are reported in terms of frequency of absorption ( $\text{cm}^{-1}$ ). Optical rotations were measured with a Jasco P-1010 polarimeter. High resolution mass spectra were obtained from the UC Irvine Mass Spectrometry Facility with a Micromass LCT spectrometer. See *JOC Standard Abbreviations and Acronyms* for abbreviations (available at [http://pubs.acs.org/userimages/ContentEditor/1218717864819/joceah\\_abbreviations.pdf](http://pubs.acs.org/userimages/ContentEditor/1218717864819/joceah_abbreviations.pdf)).

## Experimental Procedures

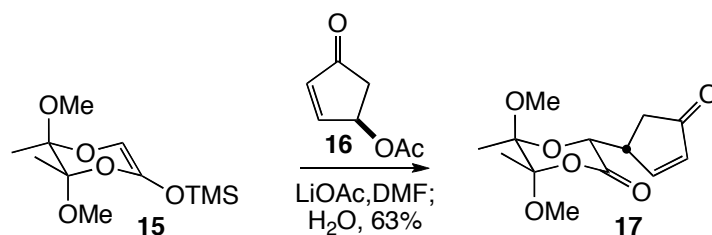

**5,6-Dimethoxy-5,6-dimethyl-3-((R)-4-oxocyclopent-2-enyl)-1,4-dioxan-2-one (17):** A solution of silyl ketene acetal **15**<sup>1</sup> (91 g, 0.347 mol) in DMF (50 mL) was added to a stirring mixture of

1. Ley SV, Dixon DJ, Guy RT, Rodriguez F, Sheppard TD (2005) Michael, Michael-aldol and Michael-Michael reactions of enolate equivalents of butane-2,3-diacetal protected glycolic acid derivatives. *Org. Biomol. Chem.* 3:4095-4107.

enone **16**<sup>2</sup> (19.5 g, 0.139 mol) and LiOAc (27.5 g, 0.416 mol) in DMF (700 mL) at 0 °C.<sup>3</sup> After 5 min, TLC analysis showed the consumption of **16**. The reaction mixture was allowed to warm to rt, H<sub>2</sub>O (3.0 mL, 190 mmol) was added, and the mixture was stirred for an additional hour. The mixture was partitioned between EtOAc (500 mL) and 1 M HCl (500 mL). The aqueous phase was extracted with EtOAc (2 × 400 mL). The organic phases were combined, dried over MgSO<sub>4</sub>, filtered, and concentrated. Purification of the residue by silica gel chromatography (50% Et<sub>2</sub>O/hexanes) followed by recrystallization (50% Et<sub>2</sub>O/hexanes, 4 crops) gave **17** (23.7 g, 63%) as a colorless solid: R<sub>f</sub> 0.21 (60% EtOAc/hexanes); mp 64-67 °C; <sup>1</sup>H NMR (CDCl<sub>3</sub>, 500 MHz) δ 7.53 (dd, *J* = 5.7, 2.3 Hz, 1H), 6.22 (dd, *J* = 5.7, 2.1 Hz, 1H), 4.21 (d, *J* = 5.2 Hz, 1H), 3.58 (m, 1H), 3.42 (s, 3H), 3.28 (s, 3H), 2.52 (dd, *J* = 18.7, 6.7 Hz, 1H), 2.42 (dd, *J* = 18.7, 2.9 Hz, 1H), 1.48 (s, 3H), 1.34 (s, 3H); <sup>13</sup>C NMR (CDCl<sub>3</sub>, 125 MHz) δ 208.6, 168.5, 163.0, 135.5, 105.6, 98.5, 71.3, 50.2, 49.3, 43.9, 37.3, 17.8, 17.0; IR (thin film) 1744, 1713, 1270 cm<sup>-1</sup>; HRMS (ESI) calculated for C<sub>13</sub>H<sub>19</sub>O<sub>6</sub> (M+H) 271.1182, observed 271.1181; [α]<sub>D</sub><sup>23</sup> +246°, [α]<sub>577</sub><sup>23</sup> +258°, [α]<sub>546</sub><sup>24</sup> +291°, [α]<sub>435</sub><sup>25</sup> +484°, [α]<sub>405</sub><sup>24</sup> +569° (*c* = 1.0, CHCl<sub>3</sub>). Crystals obtained by the above isolation procedure were suitable for X-ray diffraction crystal analysis.

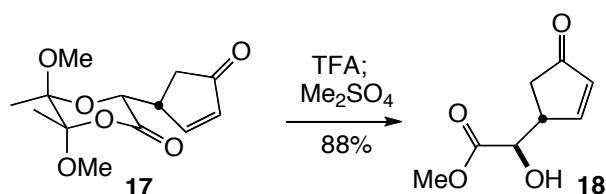

**(R)-Methyl 2-hydroxy-2-((R)-4-oxocyclopent-2-enyl)ethanoate (18):** A flask was charged with **17** (13.7 g, 50.7 mmol) at rt. A solution of TFA (170 mL) and H<sub>2</sub>O (17 mL) was added and the mixture was stirred for 5 min with a yellow homogenous solution being obtained.<sup>4</sup> This solution was concentrated *in vacuo* (<3 torr) for 18 h with stirring to give the crude hydroxy acid. The acid was dissolved in acetone (250 mL) and K<sub>2</sub>CO<sub>3</sub> (17.5 g, 127 mmol) and dimethyl sulfate (7.2 mL, 76.1 mmol) were added and the resulting mixture was vigorously stirred and heated to 50 °C for 30 min. Acetic acid (2 mL) was added and the mixture was allowed to cool to rt. The crude mixture was passed through a pad of silica gel (90% EtOAc/hexanes) to afford **18** (7.56 g, 88%)

2. Hughes CC, Miller AK, Trauner D (2005) An electrochemical approach to the guanacastepenes. *Org. Lett.* 7:3425-3428.

3. Nakagawa T, Fujisawa H, Yuzo NI, Mukaiyama T (2004) Lithium acetate-catalyzed Michael reaction between trimethylsilyl enolate and α,β-unsaturated carbonyl compound. *Chem. Lett.* 33:1016-1017.

4. Ley SV, *et al.* (1998) Total synthesis of the protein phosphatase inhibitor okadaic acid *J. Chem. Soc. Perkin Trans. 1* 3907-3911.

as a tan oil:  $R_f$  0.23 (60% EtOAc/hexanes);  $^1\text{H}$  NMR ( $\text{CDCl}_3$ , 500 MHz)  $\delta$  7.48 (dd,  $J = 5.7, 2.4$  Hz, 1H), 6.28 (dd,  $J = 5.7, 2.0$  Hz, 1H), 4.25 (t,  $J = 5.8$  Hz, 1H), 3.83 (s, 3H), 3.35 (m, 1H), 2.78 (d,  $J = 6.2$  Hz, 1H), 2.48 (dd,  $J = 18.7, 6.6$  Hz, 1H), 2.37 (dd,  $J = 18.7, 2.7$  Hz, 1H);  $^{13}\text{C}$  NMR ( $\text{CDCl}_3$ , 125 MHz)  $\delta$  208.5, 173.9, 162.3, 136.6, 71.6, 53.1, 45.3, 37.3; IR (thin film) 3423, 1706, 1675  $\text{cm}^{-1}$ ; HRMS (ESI) calculated for  $\text{C}_8\text{H}_{11}\text{O}_4$  ( $\text{M}+\text{H}$ ) 171.0657, observed 171.0652;  $[\alpha]_D^{24} +157^\circ$ ,  $[\alpha]_{577}^{24} +164^\circ$ ,  $[\alpha]_{546}^{24} +188^\circ$ ,  $[\alpha]_{435}^{24} +329^\circ$ ,  $[\alpha]_{405}^{24} +396^\circ$  ( $c = 1.0, \text{CHCl}_3$ ).

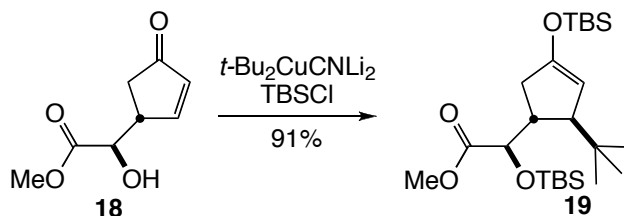

**(R)-Methyl 2-((1R,2S)-2-tert-butyl-4-(tert-butylidimethylsilyloxy)cyclopent-3-enyl)-2-(tert-butylidimethylsilyloxy)acetate (19):** The general procedure of Corey was followed.<sup>5,6</sup> A hexane solution of  $t\text{-BuLi}$  (119 mL, 1.7 M, 203 mmol) was added to a stirring suspension of  $\text{CuCN}$  (9.11 g, 101 mmol) in  $\text{Et}_2\text{O}$  (400 mL) at  $-78^\circ\text{C}$ , and the resulting solution was stirred for 30 min. The solution was warmed to  $-40^\circ\text{C}$  for 15 min, then cooled to  $-78^\circ\text{C}$ . A solution of  $\text{TBSCl}$  (15.3 g, 101 mmol) in  $\text{THF}$  (40 mL) was added via cannula transfer and the solution was stirred for an additional 5 min. A solution of hydroxy enone **18** (6.89 g, 40.5 mmol) in  $\text{THF}$  (40 mL) was added via cannula transfer and the resulting solution was allowed to gradually warm to rt over 10 h as a dark heterogeneous mixture was formed. This mixture was poured into a separatory funnel containing a mixture of saturated aqueous  $\text{NH}_4\text{Cl}$  and  $\text{NH}_4\text{OH}$  (9:1, 500 mL) and  $\text{EtOAc}$  (500 mL). The layers were separated and the organic phase was washed with additional  $\text{NH}_4\text{Cl}/\text{NH}_4\text{OH}$  solution (500 mL). The combined aqueous layers were extracted with  $\text{EtOAc}$  ( $2 \times 400$  mL). The organic phases were combined, dried over  $\text{MgSO}_4$ , filtered, and concentrated. Purification of the residue by silica gel chromatography (10%  $\text{EtOAc}/\text{hexanes}$ ) gave **19** (16.8 g, 91%) as a colorless oil:  $R_f$  0.45 (5%  $\text{EtOAc}/\text{hexanes}$ );  $^1\text{H}$  NMR ( $\text{CDCl}_3$ , 500 MHz)  $\delta$  4.49 (s, 1H), 3.98 (d,  $J = 6.4$  Hz, 1H), 3.67 (s, 3H), 2.38 (apt ddt,  $J = 16.4, 9.0, 2.5$  Hz, 1H), 2.32 (m, 1H), 2.27 (m, 1H), 1.96 (app dt,  $J = 17.5, 1.3$  Hz, 1H), 0.92 (s, 9H), 0.90 (s, 9H), 0.82 (s, 9H), 0.50 (s, 3H), 0.40 (s, 3H), 0.16 (s, 3H), 0.15 (s, 3H);  $^{13}\text{C}$  NMR ( $\text{CDCl}_3$ , 125 MHz)  $\delta$  173.7, 154.0, 103.2, 76.3,

5. Corey EJ, Kang M, Desai MC, Ghosh AK, Houpiis JN (1988) Total synthesis of (+/-)-Ginkgolide-B. *J. Am. Chem. Soc.* 110:649-651.

6. Corey EJ, Boaz NW (1985) The reactions of combined organocuprate chlorotrimethylsilane reagents with conjugated carbonyl-compounds. *Tetrahedron Lett.* 26:6019-6022.

54.1, 51.7, 40.9, 36.4, 34.5, 27.3, 25.9, 25.85, 18.4, 18.2, -4.3, -4.6, -4.9, -5.0; IR (thin film) 1758, 1652, 1252  $\text{cm}^{-1}$ ; HRMS (ESI) calculated for  $\text{C}_{24}\text{H}_{48}\text{O}_4\text{Si}_2\text{Na}$  ( $\text{M}+\text{Na}$ ) 479.2989, observed 479.2980;  $[\alpha]_{\text{D}}^{24} +10.0^\circ$ ,  $[\alpha]_{577}^{25} +10.8^\circ$ ,  $[\alpha]_{546}^{25} +11.5^\circ$ ,  $[\alpha]_{435}^{25} +20.4^\circ$ ,  $[\alpha]_{405}^{25} +22.1^\circ$  ( $c = 1.0$ ,  $\text{CHCl}_3$ ).

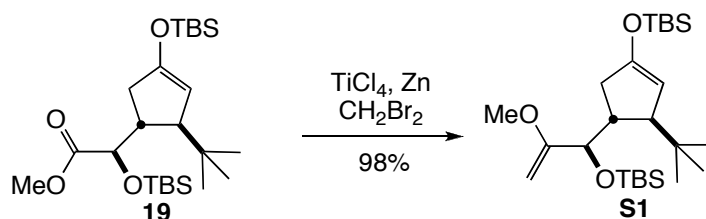

***tert*-butyl((3*S*,4*R*)-3-*tert*-butyl-4-((*R*)-1-(*tert*-butyldimethylsilyloxy)-2-methoxyallyl)**

**cyclopent-1-enyloxy)dimethylsilane (**S1**):** The general procedure of Rainer was followed.<sup>7</sup> A stirring solution of  $\text{TiCl}_4$  (7.68 mL, 69.9 mmol) in  $\text{CH}_2\text{Cl}_2$  (300 mL) was cooled to 0 °C and THF (30.0 mL) was added dropwise to generate a yellow solution. After 5 min, TMEDA (62.0 mL, 412 mmol) was added dropwise to form a red solution. After 15 min, the solution was allowed to warm to rt and a mixture of Zn (9.24 g, 142 mmol) and  $\text{PbCl}_2$  (2.3 g, 8.24 mmol) was added. The resulting mixture turned blue. After 15 min, a solution of ester **19** (4.70 g, 10.3 mmol) and  $\text{CH}_2\text{Br}_2$  (4.80 mL, 68.0 mmol) in  $\text{CH}_2\text{Cl}_2$  (30 mL) was added via cannula. The resulting mixture was gently refluxed for 1.5 h. The reaction mixture was cooled to rt and saturated aqueous  $\text{K}_2\text{CO}_3$  (10 mL) was very slowly added. The dark colored heterogenous mixture was filtered through a pad of silica with  $\text{Et}_2\text{O}$  and the eluent was concentrated *in vacuo*. Purification of the residue by silica gel chromatography (2%  $\text{EtOAc}$ /hexanes) gave **S1** (4.60 g, 98%) as a colorless oil:  $R_f$  0.63 (2.5%  $\text{Et}_2\text{O}$ /hexanes);  $^1\text{H}$  NMR ( $\text{CDCl}_3$ , 500 MHz)  $\delta$  4.52 (s, 1H), 4.09 (d,  $J = 1.8$  Hz, 1H), 3.99 (s, 1H), 3.76 (d,  $J = 7.4$  Hz, 1H), 3.48 (s, 3H), 2.33 (m, 2H), 2.18 (m, 1H), 1.88 (d,  $J = 15.9$  Hz, 1H), 0.90 (s, 9H), 0.86 (s, 9H), 0.79 (s, 9H), 0.12 (s, 3H), 0.12 (s, 3H), 0.02 (s, 3H), -0.02 (s, 3H);  $^{13}\text{C}$  NMR ( $\text{CDCl}_3$ , 125 MHz)  $\delta$  164.4, 154.2, 103.9, 83.5, 77.7, 54.7, 54.1, 40.8, 36.9, 34.7, 27.5, 26.2, 26.0, 18.5, 18.3, -4.1, -4.4, -4.5, -4.6; IR (thin film) 1715, 1658  $\text{cm}^{-1}$ ; HRMS (ESI) calculated for  $\text{C}_{25}\text{H}_{50}\text{O}_3\text{Si}_2\text{Na}$  ( $\text{M}+\text{Na}$ ) 477.3196, observed 477.3192;  $[\alpha]_{\text{D}}^{24} +13.6^\circ$ ,  $[\alpha]_{577}^{24} +14.3^\circ$ ,  $[\alpha]_{546}^{24} +16.4^\circ$ ,  $[\alpha]_{435}^{24} +28.2^\circ$ ,  $[\alpha]_{405}^{24} +33.2^\circ$  ( $c = 1.0$ ,  $\text{CHCl}_3$ ).

7. Roberts SW, Rainier JD (2007) Synthesis of an A-E gambieric acid subunit with use of a C-glycoside centered strategy. *Org. Lett.* 9:2227-2230.

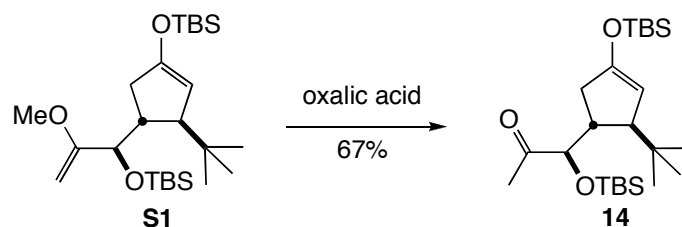

**(R)-1-((1R,2S)-2-tert-butyl-4-(tert-butyldimethylsilyloxy)cyclopent-3-enyl)-1-(tert-**

**butyldimethylsilyloxy)propan-2-one (14):** To a solution of enol ether **S1** (4.3 g, 9.47 mmol) in *i*PrOH (40 mL) and H<sub>2</sub>O (10 mL) at 0 °C was added oxalic acid (1.79 g, 14.2 mmol) and the solution was allowed to warm to rt. After 1.5 h, 10% aqueous K<sub>2</sub>CO<sub>3</sub> (250 mL) and 50% EtOAc/hexanes (200 mL) were added to the solution. The layers were separated and the aqueous layer was washed with additional 50% EtOAc/hexanes (200 mL). The organic phases were combined, dried over Na<sub>2</sub>SO<sub>4</sub>, filtered, and concentrated. Purification of the residue by silica gel chromatography (2→5% Et<sub>2</sub>O/hexanes) gave ketone **14** (2.80 g, 67%) as a colorless oil: R<sub>f</sub> 0.52 (7% Et<sub>2</sub>O/hexanes); <sup>1</sup>H NMR (CDCl<sub>3</sub>, 500 MHz) δ 4.49 (s, 1H), 3.63 (d, *J* = 8.6 Hz, 1H), 2.32 (m, 2H), 2.12 (m, 4H), 1.87 (d, *J* = 16.7 Hz, 1H), 0.88 (s, 9H), 0.86 (s, 9H), 0.77 (s, 9H), 0.12 (s, 3H), 0.11 (s, 3H), 0.03 (s, 3H), -0.03 (s, 3H); <sup>13</sup>C NMR (CDCl<sub>3</sub>, 125 MHz) δ 211.5, 154.2, 103.1, 82.4, 54.0, 40.3, 35.5, 34.7, 27.4, 26.0, 25.9, 25.3, 18.3, 18.25, -4.3, -4.55, -4.6, -4.8; IR (thin film) 1715, 1650, 1254 cm<sup>-1</sup>; HRMS (ESI) calculated for C<sub>24</sub>H<sub>48</sub>O<sub>3</sub>Si<sub>2</sub>Na (M+Na) 463.3040, observed 463.3048; [α]<sub>D</sub><sup>25</sup> +41.5°, [α]<sub>577</sub><sup>25</sup> +43.0°, [α]<sub>546</sub><sup>25</sup> -50.5°, [α]<sub>435</sub><sup>25</sup> +105°, [α]<sub>405</sub><sup>25</sup> +143° (*c* = 1.0, CHCl<sub>3</sub>).

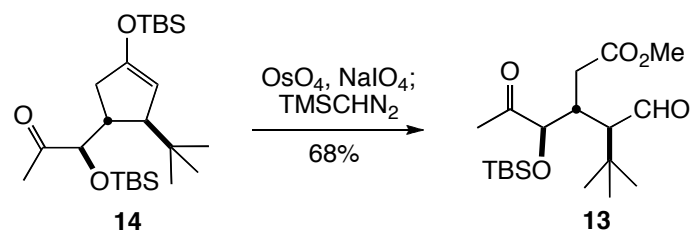

**(3R,4R)-Methyl**

**3-((R)-1-(tert-butyldimethylsilyloxy)-2-oxopropyl)-4-formyl-5,5-**

**dimethylhexanoate (13):** To a stirred mixture of enoxy silane **14** (1.20 g, 2.72 mmol) in THF (11 mL) and H<sub>2</sub>O (3.0 mL), NaIO<sub>4</sub> (1.74 g, 8.2 mmol) and OsO<sub>4</sub> (1.4 mL, 2.5 wt% in *t*BuOH, 0.136 mmol) were added. The mixture was stirred with a large stir bar for 16 h. The reaction mixture was diluted with MeOH (20 mL) and filtered through a plug of cotton. The filtrate was stirred and cooled to 0 °C and TMSCHN<sub>2</sub> (2.0 M in Et<sub>2</sub>O) was added until the color of the mixture was a persistent yellow (~15 mL). The excess TMSCHN<sub>2</sub> was destroyed by slow addition of AcOH (30% in MeOH, ~1 mL). The mixture was then filtered through a plug of cotton and the

filtrate was concentrated. Purification of the residue by silica gel chromatography (10% hexanes/EtOAc) gave tricarbonyl **13** (690 mg, 68%) as a colorless oil:  $R_f$  0.27 (10% hexanes/EtOAc);  $^1\text{H NMR}$  ( $\text{CDCl}_3$ , 600 MHz)  $\delta$  9.81 (d,  $J = 3.0$  Hz, 1H), 4.15 (d,  $J = 3.0$  Hz, 1H), 3.67 (s, 3H), 2.80 (m, 2H), 2.48 (dd,  $J = 17.9, 11.2$  Hz, 1H), 2.32 (d,  $J = 3.0$  Hz, 1H), 2.15 (s, 3H), 0.94 (s, 9H), 0.87 (s, 9H),  $-0.02$  (s, 3H),  $-0.05$  (s, 3H);  $^{13}\text{C NMR}$  ( $\text{CDCl}_3$ , 150 MHz)  $\delta$  209.3, 204.9, 173.7, 81.0, 56.9, 52.0, 37.8, 34.1, 33.7, 28.7, 26.3, 25.9, 18.4,  $-4.5$ ,  $-5.3$ ; IR (thin film) 1729, 1254, 1173  $\text{cm}^{-1}$ ; HRMS (ESI) calculated for  $\text{C}_{19}\text{H}_{36}\text{O}_5\text{SiNa}$  ( $\text{M}+\text{Na}$ ) 395.2230, observed 395.2222;  $[\alpha]_{\text{D}}^{25} +0.1^\circ$ ,  $[\alpha]_{577}^{25} -0.6^\circ$ ,  $[\alpha]_{546}^{25} -2.0^\circ$ ,  $[\alpha]_{435}^{25} -22.8^\circ$ ,  $[\alpha]_{405}^{25} -40.5^\circ$  ( $c = 1.0$ ,  $\text{CHCl}_3$ ).

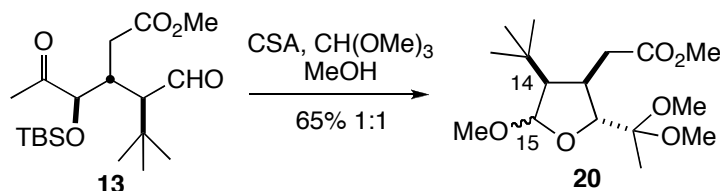

**Methyl 2-((2R,3R,4R)-4-tert-butyl-2-(1,1-dimethoxyethyl)-5-methoxytetrahydrofuran-3-yl) ethanoate (20):** To a solution of **13** (548 mg, 1.47 mmol) in MeOH (30 mL) at 0 °C was added  $\text{CH}(\text{OMe})_3$  (1.6 mL, 2.6 mmol) and camphorsulfonic acid (514 mg, 2.20 mmol) and the solution was allowed to warm to rt. After 18 h, saturated aqueous  $\text{NaHCO}_3$  (50 mL) and  $\text{CH}_2\text{Cl}_2$  (100 mL) were added and the layers were separated. The aqueous layer was extracted with  $\text{CH}_2\text{Cl}_2$  (2  $\times$  50 mL). The combined organic extracts were dried ( $\text{Na}_2\text{SO}_4$ ), filtered, and concentrated. Purification of the residue by silica gel chromatography (2–10%  $\text{Et}_2\text{O}/\text{CH}_2\text{Cl}_2$ ) afforded the more non-polar  $\beta$ -**20** (154 mg, 33%) as a yellow oil and  $\alpha$ -**20** (148 mg, 32%) as a yellow oil. Data for  $\beta$ -**20**:  $R_f$  0.5 (4%  $\text{Et}_2\text{O}/\text{CH}_2\text{Cl}_2$ );  $^1\text{H NMR}$  ( $\text{C}_6\text{D}_6$ , 500 MHz)  $\delta$  4.85 (d,  $J = 3.9$  Hz, 1H), 4.42 (d,  $J = 2.8$  Hz, 1H), 3.44 (s, 3H), 3.21 (s, 3H), 3.14 (s, 3H), 3.07 (s, 3H), 2.95 (dd,  $J = 10.3, 3.3$  Hz, 1H), 2.79 (m, 2H), 1.87 (dd,  $J = 8.2, 3.9$  Hz, 1H), 1.25 (s, 3H), 1.02 (s, 9H); 1D-NOE studies, irradiation of the anomeric C14 CH ( $\delta$  4.85) showed a 3.4% NOE (mixing time – 1.0 sec) to the C14 CH ( $\delta$  1.87);  $^{13}\text{C NMR}$  ( $\text{C}_6\text{D}_6$ , 125 MHz)  $\delta$  173.2, 106.5, 102.5, 84.2, 57.0, 54.6, 51.3, 48.9, 48.6, 39.9, 38.6, 32.0, 30.6, 17.3; IR (thin film) 2953, 1741, 1469, 1164  $\text{cm}^{-1}$ ; HRMS (ESI) calculated for  $\text{C}_{16}\text{H}_{30}\text{O}_6$  ( $\text{M}+\text{Na}$ ) 341.1940, observed 341.1938;  $[\alpha]_{\text{D}}^{25} -28.4$ ;  $[\alpha]_{577}^{25} -30.7$ ;  $[\alpha]_{546}^{25} -34.9$ ;  $[\alpha]_{435}^{25} -51.0$ ;  $[\alpha]_{405}^{25} -57.3$  ( $c = 1.0$ ,  $\text{CH}_2\text{Cl}_2$ ). Data for  $\alpha$ -**20**:  $R_f$  0.40 (4%  $\text{Et}_2\text{O}/\text{CH}_2\text{Cl}_2$ );  $^1\text{H NMR}$  ( $\text{C}_6\text{D}_6$ , 500 MHz)  $\delta$  4.88 (s, 1H), 4.11 (d,  $J = 9.9$  Hz, 1H), 3.79 (m, 4H), 3.26 (s, 3H), 3.24 (s, 3H), 3.00 (m, 4H), 2.70 (dd,  $J = 17.0, 8.9$  Hz, 1H), 2.33 (d,  $J = 7.4$  Hz, 1H), 1.47 (s, 3H), 0.91 (s, 9H); 1D-NOE studies, irradiation of the anomeric C14 CH ( $\delta$  4.88) resulted in a 0.85% NOE (mixing time – 1.0 sec) to the tert-butyl group ( $\delta$  1.02);  $^{13}\text{C NMR}$  ( $\text{C}_6\text{D}_6$ , 125 MHz)  $\delta$  173.1, 108.0, 103.3,

83.3, 58.1, 55.0, 51.4, 48.2, 48.1, 39.5, 34.8, 32.9, 29.9, 17.6; IR (thin film) 1741, 1383, 1134  $\text{cm}^{-1}$ ; HRMS (ESI) calculated for  $\text{C}_{16}\text{H}_{30}\text{O}_6$  (M+Na) 341.1940, observed 341.1943;  $[\alpha]_{\text{D}}^{25} +49.0^\circ$ ,  $[\alpha]_{577}^{25} +50.1^\circ$ ,  $[\alpha]_{546}^{25} +56.3^\circ$ ,  $[\alpha]_{435}^{25} +93.7^\circ$ ,  $[\alpha]_{405}^{25} +112.3^\circ$  ( $c = 1.0$ ,  $\text{CHCl}_3$ ).

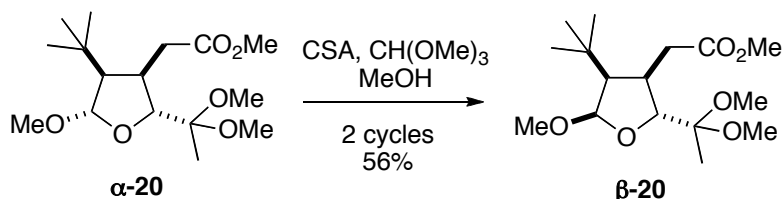

**Equilibration of 20:** A solution of  $\alpha\text{-20}$  (95 mg) was submitted to reaction conditions and isolation procedures discussed above and after two cycles 53 mg (56%) of  $\beta\text{-20}$  was isolated.

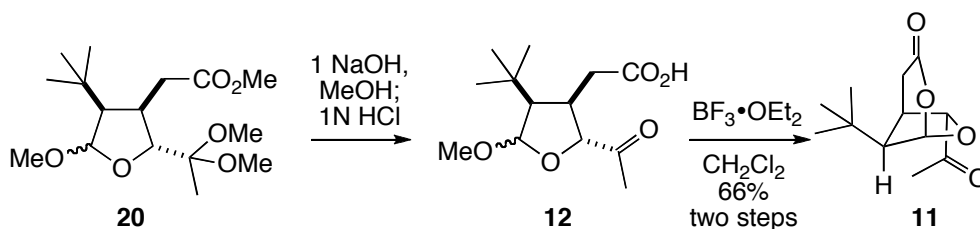

**(1*S*,5*R*,6*R*,8*R*)-8-*tert*-butyl-6-ethanoyl-2,7-dioxabicyclo[3.2.1]octan-3-one (11):** To a solution of ester **20** (105 mg, 0.33 mmol) in MeOH (13.9 mL) at rt was added 1N NaOH (1.4 mL, 1M in  $\text{H}_2\text{O}$ , 1.39 mmol) and the mixture was stirred for 18 h. The resulting mixture was cooled to 0 °C and 1 N HCl (5 mL) was added and the mixture was stirred for 30 min. To the resulting solution,  $\text{CH}_2\text{Cl}_2$  (5 mL) was added and the layers were separated and the aqueous layer was extracted with  $\text{CH}_2\text{Cl}_2$  (10  $\times$  10 mL). The combined organic layers were dried over  $\text{Na}_2\text{SO}_4$ , filtered, and concentrated to give the crude acid **12** as a clear oil that was sufficiently pure for use in the subsequent transformation. The crude acid **12** was dissolved in  $\text{CH}_2\text{Cl}_2$  (2.6 mL), cooled to 0 °C, and boron-trifluoride etherate ( $\text{BF}_3 \cdot \text{OEt}_2$ ) (34  $\mu\text{L}$ , 0.33 mmol) was added. After 1 h, saturated aqueous  $\text{NaHCO}_3$  (4 mL) was added and the layers were separated and the aqueous phase was washed with additional  $\text{CH}_2\text{Cl}_2$  (2  $\times$  5 mL). The organic phases were combined, dried over  $\text{Na}_2\text{SO}_4$ , filtered, and concentrated. Purification of the residue by silica gel chromatography (30 $\rightarrow$ 50% EtOAc/hexanes) gave **11** (49 mg, 66% from **20**) as a colorless oil:  $R_f$  0.43 (50% hexanes/EtOAc);  $^1\text{H}$  NMR ( $\text{CDCl}_3$ , 600 MHz)  $\delta$  5.73 (d,  $J = 2.4$  Hz, 1H), 4.30 (s, 1H), 3.00 (m, 2H), 2.67 (d,  $J = 18.9$  Hz, 1H), 2.22 (s, 3H), 1.68 (app t,  $J = 3.1$  Hz, 1H), 1.07 (s, 9H);  $^{13}\text{C}$  NMR ( $\text{CDCl}_3$ , 125 MHz)  $\delta$  207.2, 168.4, 101.2, 90.7, 52.2, 36.5, 35.4, 30.6, 29.9, 27.2; IR (thin film)



1748, 1719  $\text{cm}^{-1}$ ; HRMS (ESI) calculated for  $\text{C}_{12}\text{H}_{19}\text{O}_4$  ( $\text{M}+\text{H}$ ) 227.1283, observed 227.1290;  $[\alpha]_{\text{D}}^{25} -32.0^\circ$ ,  $[\alpha]_{577}^{25} -32.0^\circ$ ,  $[\alpha]_{546}^{25} -37.0^\circ$ ,  $[\alpha]_{435}^{25} -59.5^\circ$ ,  $[\alpha]_{405}^{25} -69.4^\circ$  ( $c = 0.4$ ,  $\text{CHCl}_3$ ).

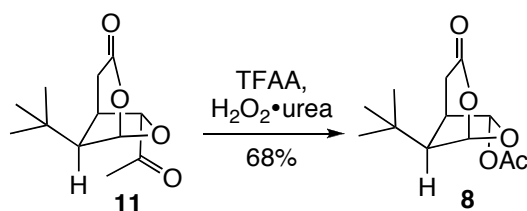

**(1S,5R,6R,8R)-8-tert-butyl-3-oxo-2,7-dioxabicyclo[3.2.1]octan-6-yl ethanoate (8):** To a solution of methyl ketone **11** (85 mg, 0.38 mmol) in  $\text{CH}_2\text{Cl}_2$  (4.7 mL) at  $0^\circ\text{C}$  was added urea $\cdot\text{H}_2\text{O}_2$  complex (354 mg, 3.76 mmol) and TFAA (210  $\mu\text{L}$ , 1.50 mmol).<sup>8</sup> The mixture was stirred for 30 min and then allowed to warm to rt and stirred for 30 min. To the resulting mixture, saturated aqueous  $\text{NaHCO}_3$  (10 mL) and  $\text{CH}_2\text{Cl}_2$  (5 mL) were added and the layers were separated. The aqueous layer was extracted with  $\text{CH}_2\text{Cl}_2$  ( $2 \times 10$  mL). The organic phases were combined, dried over  $\text{Na}_2\text{SO}_4$ , filtered, and concentrated. Purification of the residue by silica gel chromatography (50% hexanes/EtOAc) gave **8** (62 mg, 68%) as a clear oil:  $R_f$  0.27 (66% hexanes/Et<sub>2</sub>O);  $^1\text{H}$  NMR ( $\text{CDCl}_3$ , 500 MHz)  $\delta$  6.11 (s, 1H), 5.67 (d,  $J = 2.3$  Hz, 1H), 2.95 (dd,  $J = 19.7, 6.0$  Hz, 1H), 2.69 (d,  $J = 19.7$  Hz, 1H), 2.64 (m, 1H), 2.22 (m, 1H), 2.08 (s, 3H), 1.12 (s, 9H);  $^{13}\text{C}$  NMR ( $\text{CDCl}_3$ , 125 MHz)  $\delta$  169.7, 167.7, 101.6, 100.8, 49.8, 37.8, 33.6, 30.8, 30.0, 21.3; IR (thin film)  $1750\text{ cm}^{-1}$ ; HRMS (ESI) calculated for  $\text{C}_{12}\text{H}_{18}\text{O}_5\text{Na}$  ( $\text{M}+\text{Na}$ ): 265.1052, observed: 265.1042;  $[\alpha]_{\text{D}}^{27} -92.6^\circ$ ,  $[\alpha]_{577}^{27} -97.1^\circ$ ,  $[\alpha]_{546}^{28} -109^\circ$ ,  $[\alpha]_{435}^{28} -185^\circ$ ,  $[\alpha]_{405}^{27} -220^\circ$  ( $c = 1.0$ ,  $\text{CHCl}_3$ ).

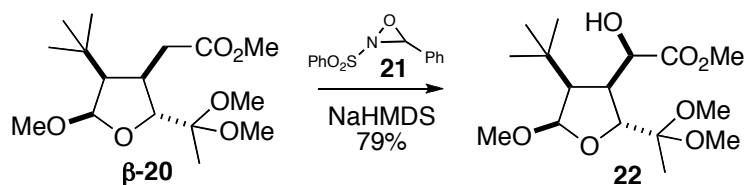

**(R)-methyl 2-((2R,3S,4R,5R)-4-tert-butyl-2-(1,1-dimethoxyethyl)-5-methoxytetrahydrofuran-3-yl)-2-hydroxyethanoate (22):** A solution of  $\beta$ -**20** (80 mg, 0.25 mmol) in THF (2 mL) was cooled to  $0^\circ\text{C}$  and a solution of 1 M NaHMDS in THF (0.52 mmol, 520  $\mu\text{L}$ ) was added. After 1 h, the solution was cooled to  $-78^\circ\text{C}$  and a solution of (+/-)-trans-2-(phenylsulfonyl)-3-

8. Cooper MS, Heaney H, Newbold, AJ, Sanderson WR (1990) Oxidation reactions using urea-hydrogen peroxide; a safe alternative to anhydrous hydrogen peroxide *Synlett* 533-535.

phenyloxaziridine (**21**)<sup>9</sup> (101 mg, 0.39 mmol) in THF (300  $\mu$ L) was added. After 2 h, saturated aqueous NaHCO<sub>3</sub> (5 mL) and CH<sub>2</sub>Cl<sub>2</sub> (5 mL) were added and the layers were separated. The aqueous layer was extracted with CH<sub>2</sub>Cl<sub>2</sub> (5  $\times$  3 mL). The combined organic extracts were dried (Na<sub>2</sub>SO<sub>4</sub>), filtered, and concentrated. Purification of the residue by silica gel chromatography (30% EtOAc/hexanes) afforded a solid mixture. Trituration of this mixture to remove byproducts derived from **21** by stirring in 20% EtOAc/hexanes, filtration, and the concentration of the filtrate afforded **22** as a white solid (69 mg, 79%): R<sub>f</sub> 0.15 (40% EtOAc/hexanes); m.p. 109-110 °C; <sup>1</sup>H NMR (CDCl<sub>3</sub>, 500 MHz)  $\delta$  5.19 (s, 1H), 4.96 (d, *J* = 3.9 Hz, 1 H), 4.64 (s, 1H), 4.41 (d, *J* = 3.4 Hz, 1H), 3.72 (s, 3H), 3.44 (s, 3H), 3.22 (s, 3H), 3.16 (s, 3H), 2.68 (dd, *J* = 9.8, 3.4 Hz, 1 H), 2.02 (dd, *J* = 3.9, 9.8 Hz, 1H), 1.17 (s, 3H), 1.10 (s, 9H); <sup>13</sup>C NMR (CDCl<sub>3</sub>, 125 MHz)  $\delta$  173.1, 104.6, 101.8, 76.6, 68.9, 56.3, 54.6, 52.1, 48.8, 48.6, 44.0, 31.6, 29.9, 16.4; IR (thin film) 3352, 1759, 1372, 1063 cm<sup>-1</sup>; HRMS (ESI) calculated for C<sub>16</sub>H<sub>30</sub>O<sub>7</sub> (M+Na) 357.1889, observed 357.1884; [ $\alpha$ ]<sub>D</sub><sup>25</sup> -34.9; [ $\alpha$ ]<sub>577</sub><sup>25</sup> -36.9; [ $\alpha$ ]<sub>546</sub><sup>25</sup> -42.0; [ $\alpha$ ]<sub>435</sub><sup>25</sup> -67.2; [ $\alpha$ ]<sub>405</sub><sup>25</sup> -78.4 (*c* = 0.4, CH<sub>2</sub>Cl<sub>2</sub>).

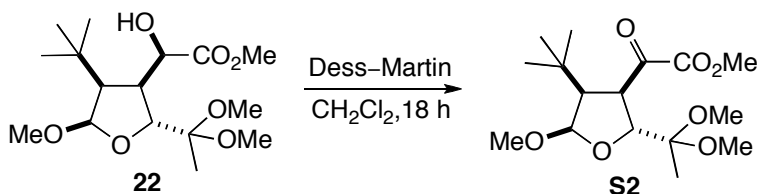

**Methyl 2-((2R,3R,4R,5R)-4-tert-butyl-2-(1,1-dimethoxyethyl)-5-methoxytetrahydrofuran-3-yl)-2-oxoethanoate (S2):** A solution of **22** (69 mg, 0.21 mmol) was dissolved in CH<sub>2</sub>Cl<sub>2</sub> (2.1 mL) and NaHCO<sub>3</sub> (84 mg, 1.0 mmol) and Dess–Martin periodinane (140 mg, 0.33 mmol) were added and the mixture allowed to stir for 18 h at 25 °C. To the resulting mixture, 10% aqueous sodium thiosulfate (3 mL) and saturated sodium bicarbonate (3 mL) were added and the mixture was stirred for 20 min. The mixture was extracted with CH<sub>2</sub>Cl<sub>2</sub> (3  $\times$  5 mL). The combined organic extracts were dried (Na<sub>2</sub>SO<sub>4</sub>), filtered, and concentrated to afford material of sufficient purity for use in the next reaction. For characterisation purposes the residue could be further purified by silica gel chromatography (10 $\rightarrow$ 30% EtOAc/hexanes) to afford **22** as a colorless oil: R<sub>f</sub> 0.49 (40% EtOAc/hexanes); <sup>1</sup>H NMR (CDCl<sub>3</sub>, 500 MHz)  $\delta$  4.95 (d, *J* = 3.9 Hz, 1H), 4.72 (d, *J* = 5.2 Hz, 1H), 4.01 (dd, *J* = 10.9, 5.2 Hz, 1H), 3.86 (s, 3H), 3.36 (s, 3H), 3.23 (s, 3H), 3.13 (s, 3H), 2.22 (dd, *J* = 3.9, 10.9, 1H), 1.24 (s, 3H), 0.97 (s, 9H); <sup>13</sup>C NMR (CDCl<sub>3</sub>, 125 MHz)  $\delta$  195.4, 162.6, 106.4, 101.8, 82.3, 61.5, 54.6, 53.3, 48.9, 48.8, 46.4, 32.2, 30.2, 16.6; IR (thin film) 2954, 1731, 1369, 1265, 1145 cm<sup>-1</sup>; HRMS (ESI) calculated for C<sub>16</sub>H<sub>28</sub>O<sub>7</sub> (M+Na) 355.1733, observed

9. Vishwakarma LC, Stringer OD, Davis FA (1988) (+/-)-Trans-2-(Phenylsulfonyl)-3-Phenyloxaziridine. *Org. Synth.* 66:203-210.

355.1729;  $[\alpha]_{\text{D}}^{25} -49.8$ ;  $[\alpha]_{577}^{25} -61.0$ ;  $[\alpha]_{546}^{25} -66.4$ ;  $[\alpha]_{435}^{25} -104.3$ ;  $[\alpha]_{405}^{25} -136.1$  ( $c = 0.15$ ,  $\text{CH}_2\text{Cl}_2$ ).

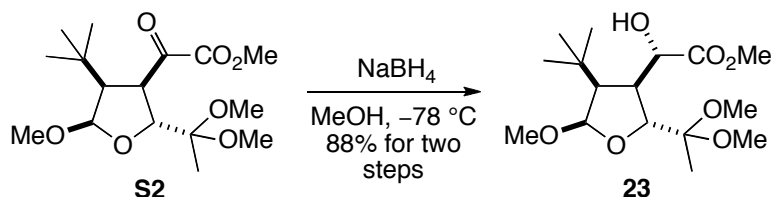

**Methyl 2-((2*R*,3*S*,4*R*,5*R*)-4-*tert*-butyl-2-(1,1-dimethoxyethyl)-5-methoxytetrahydrofuran-3-yl)-2-hydroxyethanoate (**23**):** A solution of crude **S2** from above in MeOH (2.1 mL) was cooled to  $-78\text{ }^\circ\text{C}$  and  $\text{NaBH}_4$  (23 mg, 0.62 mmol) was added. After 30 min, saturated aqueous  $\text{NaHCO}_3$  (3 mL) and  $\text{CH}_2\text{Cl}_2$  (3 mL) were added and the layers were separated. The aqueous layer was extracted with  $\text{CH}_2\text{Cl}_2$  ( $3 \times 3$  mL). The combined organic extracts were dried ( $\text{Na}_2\text{SO}_4$ ), filtered, and concentrated. Purification of the residue by silica gel chromatography (20 $\rightarrow$ 30% EtOAc/hexanes) afforded **23** as a colorless oil (61 mg, 88% from **22**):  $R_f$  0.41 (40% EtOAc/hexanes);  $^1\text{H}$  NMR ( $\text{CDCl}_3$ , 500 MHz)  $\delta$  4.95 (d,  $J = 3.5$  Hz, 1H), 4.68 (d,  $J = 6.5$  Hz, 1H), 4.33 (d,  $J = 4.1$  Hz, 1H), 4.30 (dd,  $J = 6.5, 3.1$  Hz, 1H), 3.74 (s, 3H), 3.40 (s, 3H), 3.27 (s, 3H), 3.24 (s, 3H), 2.85 (m, 1H), 1.93 (dd,  $J = 9.5, 3.5$  Hz, 1H), 1.24 (s, 3H), 1.01 (s, 9H);  $^{13}\text{C}$  NMR ( $\text{CDCl}_3$ , 125 MHz)  $\delta$  174.3, 105.1, 102.4, 81.5, 72.7, 58.1, 54.4, 52.2, 48.9, 48.6, 43.7, 31.2, 30.0, 16.3; IR (thin film) 2951, 1732, 1211, 1179  $\text{cm}^{-1}$ ; HRMS (ESI) calculated for  $\text{C}_{16}\text{H}_{30}\text{O}_7$  ( $\text{M}+\text{Na}$ ) 357.1889 observed 357.1881;  $[\alpha]_{\text{D}}^{25} -31.3$ ;  $[\alpha]_{577}^{25} -33.6$ ;  $[\alpha]_{546}^{25} -33.8$ ;  $[\alpha]_{435}^{25} -53.1$ ;  $[\alpha]_{405}^{25} -54.3$  ( $c = 0.2$ ,  $\text{CH}_2\text{Cl}_2$ ).

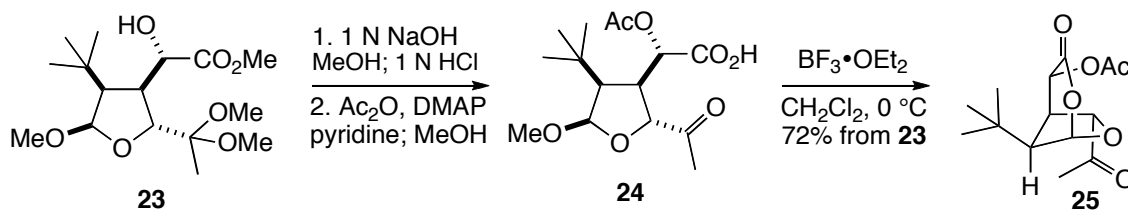

**8-*tert*-Butyl-6-ethanoyl-3-oxo-2,7-dioxabicyclo[3.2.1]octan-4-yl ethanoate (**25**):** To a solution of **23** (61 mg, 0.18 mmol) in MeOH (1 mL), 1N aqueous NaOH (300  $\mu\text{L}$ ) was added. The mixture was stirred for 18 h, cooled to  $0\text{ }^\circ\text{C}$ , and 1N HCl (5.0 mL) was added and the stirred mixture was allowed to warm to rt after 5 min. After 1 h,  $\text{CH}_2\text{Cl}_2$  (3 mL) was added and the layers were separated. The aqueous layer was extracted with  $\text{CH}_2\text{Cl}_2$  ( $10 \times 2$  mL). The combined organic extracts were dried ( $\text{Na}_2\text{SO}_4$ ), filtered, and concentrated to yield the crude acid that was used without further purification. Diagnostic data for crude acid:  $^1\text{H}$  NMR (600 MHz,  $\text{C}_6\text{D}_6$ )  $\delta$

4.68 (d,  $J = 3.6$  Hz, 1H), 4.19 (m, 2H), 3.35 (m, 1H), 2.96 (s, 3H), 1.80 (s, 3H), 1.75 (dd,  $J = 7.8$ , 4.0 Hz, 1H), 0.91 (s, 9H), 0.88 (t, 1H,  $J = 6.0$  Hz); MS (ESI) calculated for  $C_{13}H_{22}O_6$  (M-H) 273.14, observed 273.13. The crude acid was dissolved in  $CH_2Cl_2$  (2 mL) and pyridine (134  $\mu$ L, 1.44 mmol),  $Ac_2O$  (101  $\mu$ L, 1.08 mmol), and DMAP (1.18 mg, 0.009 mmol) were added. After 3 h at 25 °C, MeOH (2 mL) was added and after 20 min and the solution was concentrated. The residue was dissolved in heptane (1 mL) and the solution was concentrated. This was repeated with heptane (2  $\times$  1 mL) and benzene (2  $\times$  1 mL) to yield the crude acetylated acid **24** that was used without further purification. Diagnostic data for crude **24**:  $^1H$  NMR (600 MHz,  $C_6D_6$ )  $\delta$  5.78 (d,  $J = 6.8$  Hz, 1H), 5.03 (s, 1H), 4.88 (d,  $J = 3.9$  Hz, 1H), 3.24 (m, 1H), 3.13 (s, 3H), 1.96 (s, 3H), 1.74 (s, 3H), 1.23 (m, 1H), 1.02 (s, 9H); MS (ESI) calculated for  $C_{15}H_{24}O_7$  (M-H) 315.14, observed 315.13. The crude acid was dissolved in  $CH_2Cl_2$  (2 mL) and cooled to 0 °C and  $BF_3 \cdot OEt_2$  (25  $\mu$ L, 0.042 mmol) in  $CH_2Cl_2$  (100  $\mu$ L) was added. After 10 min, saturated aqueous  $NaHCO_3$  (2 mL) and  $CH_2Cl_2$  (2 mL) were added and the layers were separated. The aqueous layer was extracted with  $CH_2Cl_2$  (4  $\times$  2 mL). The combined organic extracts were dried ( $Na_2SO_4$ ), filtered, and concentrated. Purification of the residue by silica gel chromatography (30% EtOAc/hexanes) **25** as a white solid (36.0 mg, 72%):  $R_f$  0.34 (40% EtOAc/hexanes); m.p. 98–99 °C;  $^1H$  NMR ( $CDCl_3$ , 500 MHz)  $\delta$  5.92 (d,  $J = 4.9$  Hz, 1H), 5.71 (d,  $J = 1.8$  Hz, 1H), 4.72 (s, 1H), 3.15 (apt t,  $J = 4.5$  Hz, 1H), 2.22 (s, 3H), 2.18 (s, 3H), 1.83 (m, 1H), 1.12 (s, 9H);  $^{13}C$  NMR ( $CDCl_3$ , 125 MHz)  $\delta$  206.4, 169.3, 166.5, 101.6, 83.6, 66.9, 54.8, 41.4, 30.8, 30.3, 27.2, 20.9; IR (thin film) 2958, 1767, 1372, 1223  $cm^{-1}$ ; HRMS (ESI) calculated for  $C_{14}H_{20}O_6$  (M+Na) 307.1158, observed 307.1154;  $[\alpha]_D^{24} -110.3$ ;  $[\alpha]_{577}^{24} -112.1$ ;  $[\alpha]_{546}^{24} -126.4$ ;  $[\alpha]_{435}^{24} -211.3$ ;  $[\alpha]_{405}^{24} -249.3$  ( $c = 0.3$ ,  $CH_2Cl_2$ ).

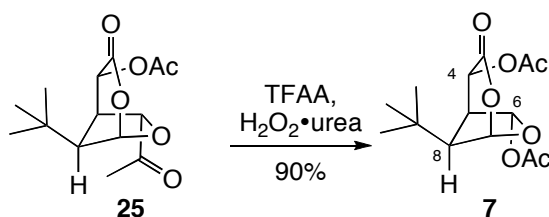

**tert-Bu-MacE (7):** To a solution of methyl ketone **25** (36 mg, 0.13 mmol) in  $CH_2Cl_2$  (1.3 mL) at 0 °C was added urea• $H_2O_2$  complex (97 mg, 1.04 mmol) followed by TFAA (72  $\mu$ L, 0.51 mmol) in  $CH_2Cl_2$  (200  $\mu$ L). The mixture was stirred for 30 min and then allowed to warm to rt and stirred for 30 min. To the resulting mixture, saturated aqueous  $NaHCO_3$  (2 mL) and  $CH_2Cl_2$  (2 mL) were added and the layers were separated. The aqueous layer was extracted with  $CH_2Cl_2$  (3  $\times$  2 mL). The combined organic extracts were dried ( $Na_2SO_4$ ), filtered, and concentrated.

Purification of the residue by silica gel chromatography (30% hexanes/EtOAc) gave **7** (35 mg, 90%) as a white solid:  $R_f$  0.34 (40% EtOAc/ hexanes); m.p. 103–105 °C;  $^1\text{H}$  NMR ( $\text{CDCl}_3$ , 500 MHz)  $\delta$  6.48 (s, 1H), 5.88 (d,  $J = 5.3$  Hz, 1H), 5.67 (d,  $J = 1.8$  Hz, 1H), 2.85 (apt. t,  $J = 4.3$  Hz, 1H), 2.43 (apt. t,  $J = 3.2$  Hz, 1H), 2.19 (s, 3H), 2.08 (s, 3H), 1.17 (s, 9H);  $^{13}\text{C}$  NMR ( $\text{CDCl}_3$ , 125 MHz)  $\delta$  169.6 (2 carbons), 165.9, 101.1, 96.4, 66.2, 52.7, 44.4, 30.8, 30.3, 21.3, 20.8; IR (thin film) 2916, 1749, 1370, 1214  $\text{cm}^{-1}$ ; HRMS (ESI) calculated for  $\text{C}_{14}\text{H}_{20}\text{O}_7$  ( $\text{M}+\text{Na}$ ) 323.1107, observed 323.1112;  $[\alpha]_{\text{D}}^{25} -82.1$ ;  $[\alpha]_{577}^{25} -85.3$ ;  $[\alpha]_{546}^{25} -95.3$ ;  $[\alpha]_{435}^{25} -149.7$ ;  $[\alpha]_{405}^{25} -179.1$  ( $c = 0.15$ ,  $\text{CH}_2\text{Cl}_2$ ). X-ray quality crystals were obtained via vapour diffusion by dissolving **7** in benzene and exposing to hexanes vapour.

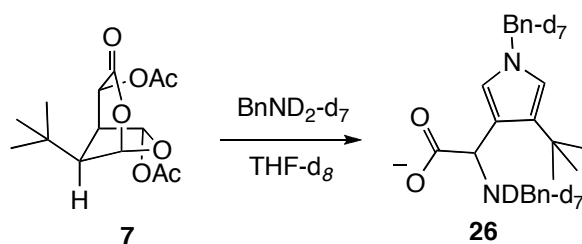

**In situ observation of 26:** To a solution of **7** (3 mg, 0.010 mmol) in  $\text{THF-d}_8$  (400  $\mu\text{L}$ ) in a 5 mm NMR tube,  $\text{C}_6\text{D}_5\text{CD}_2\text{ND}_2^{10}$  (10  $\mu\text{L}$ ) was added. The solution was allowed to stand for 36 h and compound **26**<sup>11</sup>,  $\text{AcO}^-\text{ND}_3\text{Bn-d}_7^+$ , and  $\text{Bn-d}_7\text{N(H,D)Ac}$  were observed as the major new products. Key spectral data for **26**:  $^1\text{H}$  NMR ( $\text{THF-d}_8$ , 500 MHz)  $\delta$  6.77 (bs, 1H) 6.37 (bs, 1H), 4.48 (s, 1H), 1.25 (s, 9H);  $^{13}\text{C}$  NMR ( $\text{THF-d}_8$ , 125 MHz)  $\delta$  177.3, 133.4, 122.0, 121.6, 117.5, 60.0, 53.0, 52.1, 32.4, 32.2; HRMS (ESI) calculated for  $\text{C}_{24}\text{H}_{14}\text{D}_{14}\text{N}_2\text{O}_2$  ( $\text{M}+\text{Na}$ ) 389.2946, observed 389.2951. Key spectral data for  $\text{AcO}^-\text{ND}_3\text{Bn-d}_7^+$ :  $^1\text{H}$  NMR ( $\text{THF-d}_8$ , 500 MHz)  $\delta$  1.86;  $^{13}\text{C}$  NMR ( $\text{THF-d}_8$ , 125 MHz)  $\delta$  172.8, 21.0. Key spectral data for  $\text{Bn-d}_7\text{NHAc}$ :  $^1\text{H}$  NMR ( $\text{THF-d}_8$ , 500 MHz)  $\delta$  1.85;  $^{13}\text{C}$  ( $\text{THF-d}_8$ , 500 MHz)  $\delta$  169.35, 22.86. Key spectral data for  $\text{Bn-d}_7\text{NDAc}$ :  $^1\text{H}$  NMR  $\delta$  1.85;  $^{13}\text{C}$  ( $\text{THF-d}_8$ , 500 MHz)  $\delta$  169.27, 22.81.<sup>12</sup>

10. Prepared from  $\text{C}_6\text{D}_5\text{CD}_2\text{NH}_2$  (Sabine L, Grehl M (1994) Diastereoselective Synthesis of  $\alpha$ -Hydroxy and  $\alpha$ -Aminoindolizidines and Quinolizidines. Evidence for a Novel Cyclization/Hydride Migration Mechanism in the  $\text{TiCl}_4$ -Induced Reaction of Prolinal Benzylamines by Deuterium Labeling Studies. *Chem. Ber.* 127:2023-2034). A solution of  $\text{BnNH}_2\text{-d}_7$  (0.2 mL) in  $\text{D}_2\text{O}$  (0.5 mL) was stirred for 5 min and  $\text{CH}_2\text{Cl}_2$  (0.5 mL) was added and the layers were separated. The organic layer was concentrated and  $\text{D}_2\text{O}$  (0.5 mL) was added. After 5 min,  $\text{CH}_2\text{Cl}_2$  (0.5 mL) was added and the layers were separated. The organic layer was dried ( $\text{Na}_2\text{SO}_4$ ) and concentrated to yield clean  $\text{C}_6\text{D}_5\text{CD}_2\text{ND}_2$  by  $\text{H}_1$ -NMR.

11. See page 18 for full NMR assignment.

12.  $\text{Bn-d}_7\text{NHAc}$  and  $\text{Bn-d}_7\text{NDAc}$  were prepared independently.

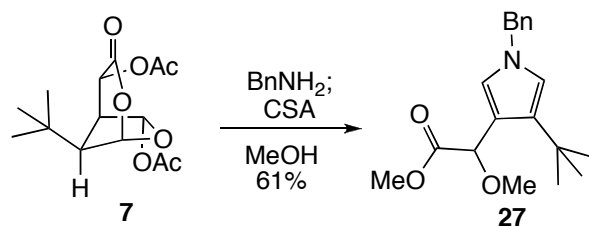

**Methyl 2-(1-benzyl-4-*tert*-butyl-1*H*-pyrrol-3-yl)-2-methoxyethanoate (27):** BnNH<sub>2</sub> (3.5 μL, 0.03 mmol) was added to a solution of **7** (4 mg, 0.013 mmol) in MeOH (0.65 mL). After 18 h at rt CSA (12 mg, 0.052 mmol) was added and the solution was stirred for an additional 18 h. To the resulting solution, saturated aqueous NaHCO<sub>3</sub> (2 mL) and CH<sub>2</sub>Cl<sub>2</sub> (2 mL) were added and the layers were separated. The aqueous layer was extracted with CH<sub>2</sub>Cl<sub>2</sub> (3 × 2 mL). The combined organic extracts were dried (Na<sub>2</sub>SO<sub>4</sub>), filtered, and concentrated. Purification of the residue by silica gel chromatography (10→20% hexanes/EtOAc) gave **27**<sup>13</sup> (2.5 mg, 61%) as a clear oil: R<sub>f</sub> 0.24 (20% EtOAc/ hexanes); <sup>1</sup>H NMR (CDCl<sub>3</sub>, 500 MHz) δ 7.28 (m, 3H), 7.10 (apt. d, 1H, *J* = 7.0 Hz), 6.69 (d, 1H, *J* = 2.5 Hz), 6.34 (d, 1H, *J* = 2.5 Hz), 5.05 (s, 1H), 4.90 (s, 2H), 3.71 (s, 3H), 3.37 (s, 3H), 1.29 (s, 9H); <sup>13</sup>C NMR (CDCl<sub>3</sub>, 125 MHz) δ 172.9, 137.7, 133.2, 128.9, 127.9, 127.6, 122.3, 117.8, 116.8, 76.3, 57.2, 53.7, 52.2, 31.9, 31.5; IR (thin film) 2916, 1747, 1099 cm<sup>-1</sup>; HRMS (ESI) calculated for C<sub>19</sub>H<sub>25</sub>NO<sub>3</sub> (M+Na) 338.1732, observed 338.1730.

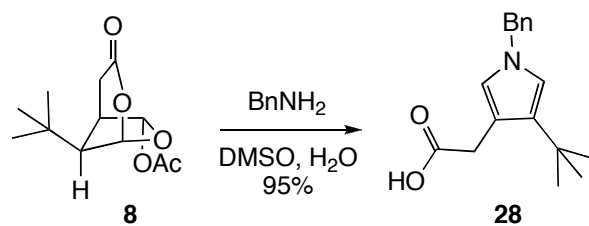

**2-(1-benzyl-4-*tert*-butyl-pyrrol-3-yl)ethanoic acid (28):** To a solution of **8** (4 mg, 0.016 mmol) in H<sub>2</sub>O (0.72 mL) and DMSO (80 μL), BnNH<sub>2</sub> (9 μL, 0.082 mmol) was added. The

---

Bn-d<sub>7</sub>NHAc: To a solution of Bn-d<sub>7</sub>NH<sub>2</sub> (50 mg, 0.43 mmol) in CH<sub>2</sub>Cl<sub>2</sub> (0.9 mL), TEA (136 μL, 0.47 mmol) and Ac<sub>2</sub>O (43 μL, 0.47 mmol) were added. The solution was allowed to stand for 18 h and then 1 N HCl (1 mL) was added and the layers were separated. The organic layer was extracted with 1 N NaOH (1 mL) and the organic layer was dried (Na<sub>2</sub>SO<sub>4</sub>) and concentrated to yield Bn-d<sub>7</sub>NHAc.

Bn-d<sub>7</sub>NDAc: Bn-d<sub>7</sub>NHAc (25 mg) in CDCl<sub>3</sub> (1 mL) was stirred with 40% NaOD in D<sub>2</sub>O for 5 min. The layers were separated and the organic layer was dried (Na<sub>2</sub>SO<sub>4</sub>) and concentrated to afford Bn-d<sub>7</sub>NDAc.

Clean <sup>13</sup>C spectra (in THF-d<sub>8</sub>) were obtained for each compound and then the solutions were mixed and a mixed <sup>13</sup>C spectra was obtained in which doubled signals were observed with chemical shifts within 0.1 ppm of those listed above. This result demonstrates that the <sup>13</sup>C doubling observed with d<sub>7</sub>-benzyl acetamide is consistent with an isotopic shift reflecting the presence of a mixture of deuterio and protio d<sub>7</sub>-benzyl acetamide species.

13. See page 18 for full NMR assignment.

solution was stirred at rt for 36 h. To the resulting solution, saturated aqueous  $\text{NH}_3\text{Cl}$  (2 mL) and  $\text{CH}_2\text{Cl}_2$  (2 mL) were added and the layers were separated. The aqueous layer was extracted with  $\text{CH}_2\text{Cl}_2$  ( $3 \times 2$  mL). The combined organic extracts were dried ( $\text{Na}_2\text{SO}_4$ ), filtered, and concentrated. Purification of the residue by silica gel chromatography (50 $\rightarrow$ 100% hexanes/EtOAc) gave **28**<sup>14</sup> (4.2 mg, 95%) as a clear oil:  $R_f$  0.28 (20% EtOAc/ hexanes);  $^1\text{H}$  NMR ( $\text{DMSO-d}_6$ , 500 MHz)  $\delta$  11.95 (bs, 1H), 7.32 (m, 2H), 7.27 (m, 1H), 7.21 (m, 2H), 6.59 (d, 1H,  $J = 2.4$  Hz), 6.49 (d, 1H,  $J = 2.4$  Hz), 4.94 (s, 2H), 3.40 (s, 2H), 1.18 (s, 9H);  $^{13}\text{C}$  NMR ( $\text{DMSO-d}_6$ , 125 MHz)  $\delta$  173.7, 138.9, 131.0, 128.5, 127.5, 127.3, 121.4, 116.8, 113.2, 52.1, 32.9, 31.1, 30.9; IR (thin film) 2959, 1708, 1150  $\text{cm}^{-1}$ ; HRMS (ESI) calculated for  $\text{C}_{17}\text{H}_{21}\text{NO}_2$  (M+Na) 294.1470, observed 294.1478.

---

14. See page 19 for full assignment.

**X-ray structure of 7<sup>15</sup>**

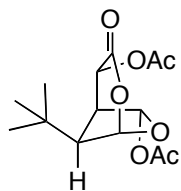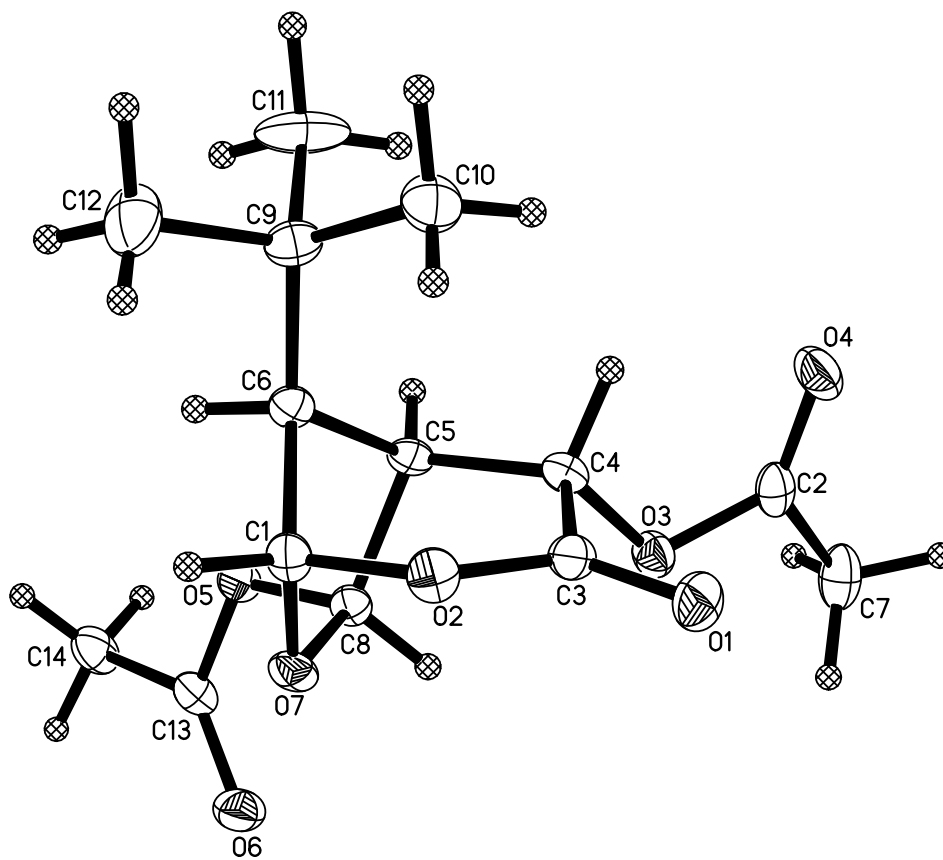

<sup>15</sup> The thermal ellipsoid plot is shown at the 50% probability level.



**X-ray structure of 17<sup>16</sup>**

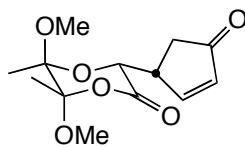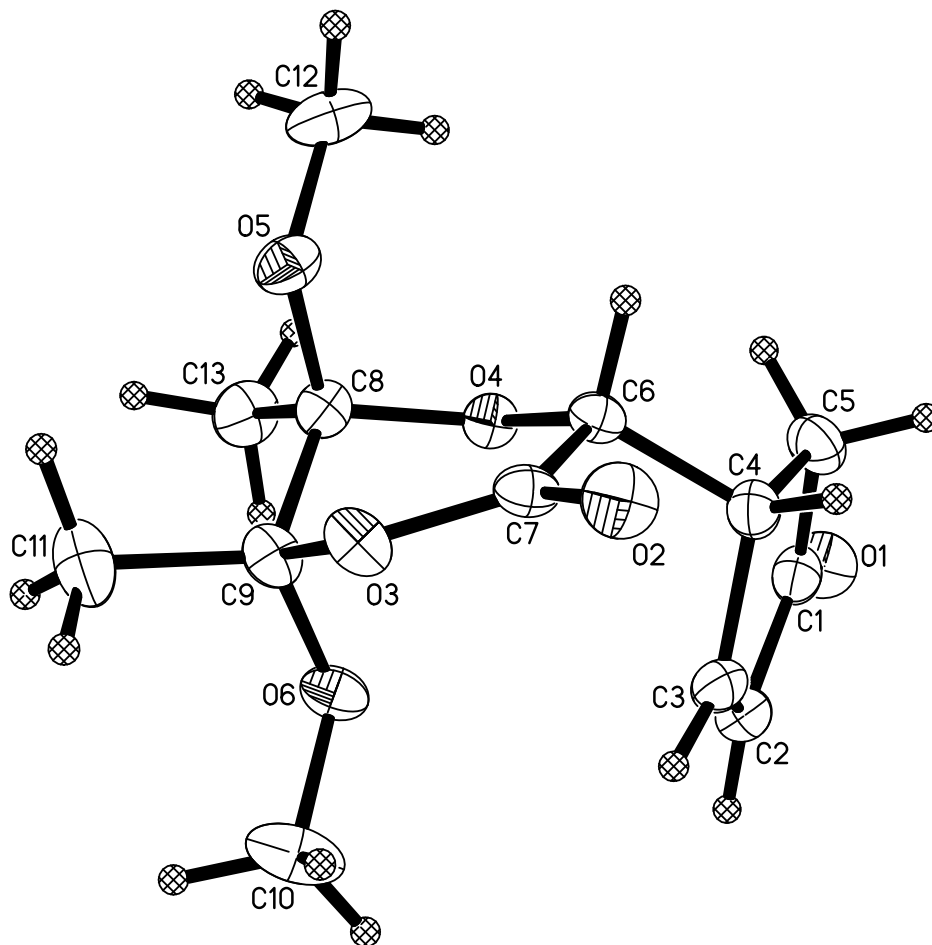

<sup>16</sup> The thermal ellipsoid plot is shown at the 50% probability level.

### NMR Assignment of 26, 27, and 28

#### Assignment of 26

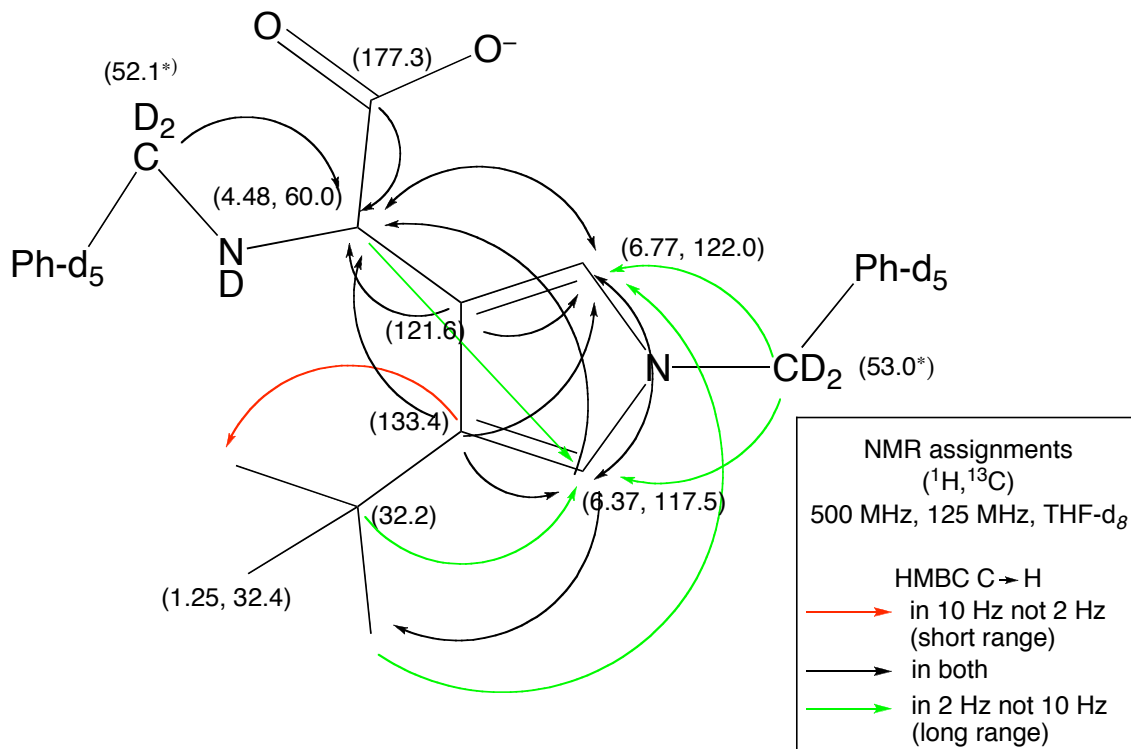

\* CD<sub>2</sub> not observed in C<sub>13</sub> spectra because of C-D splitting, only observed in HMBC

#### Assignment of 27

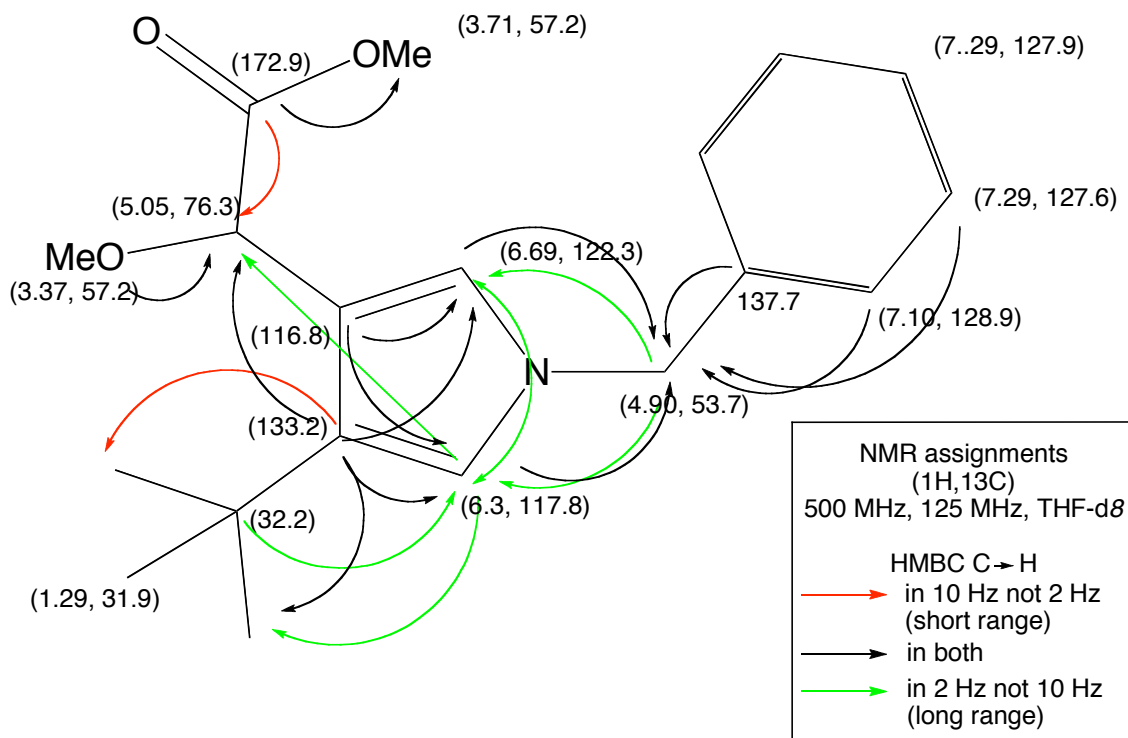

Assignment of **28**

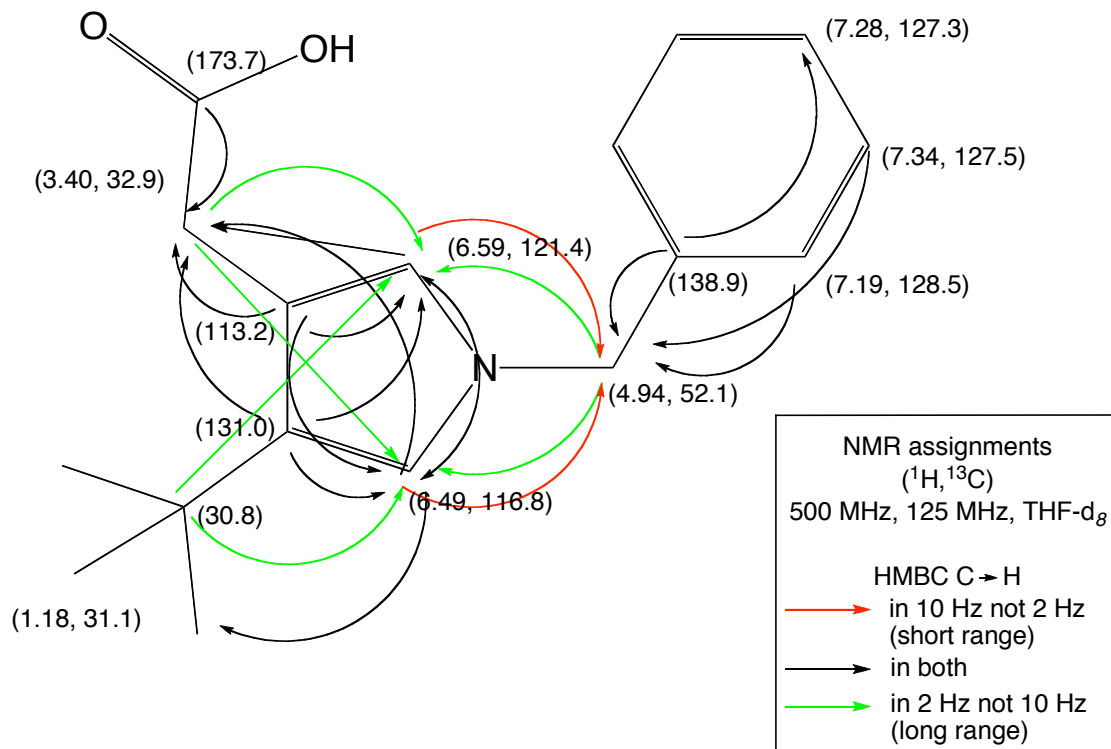

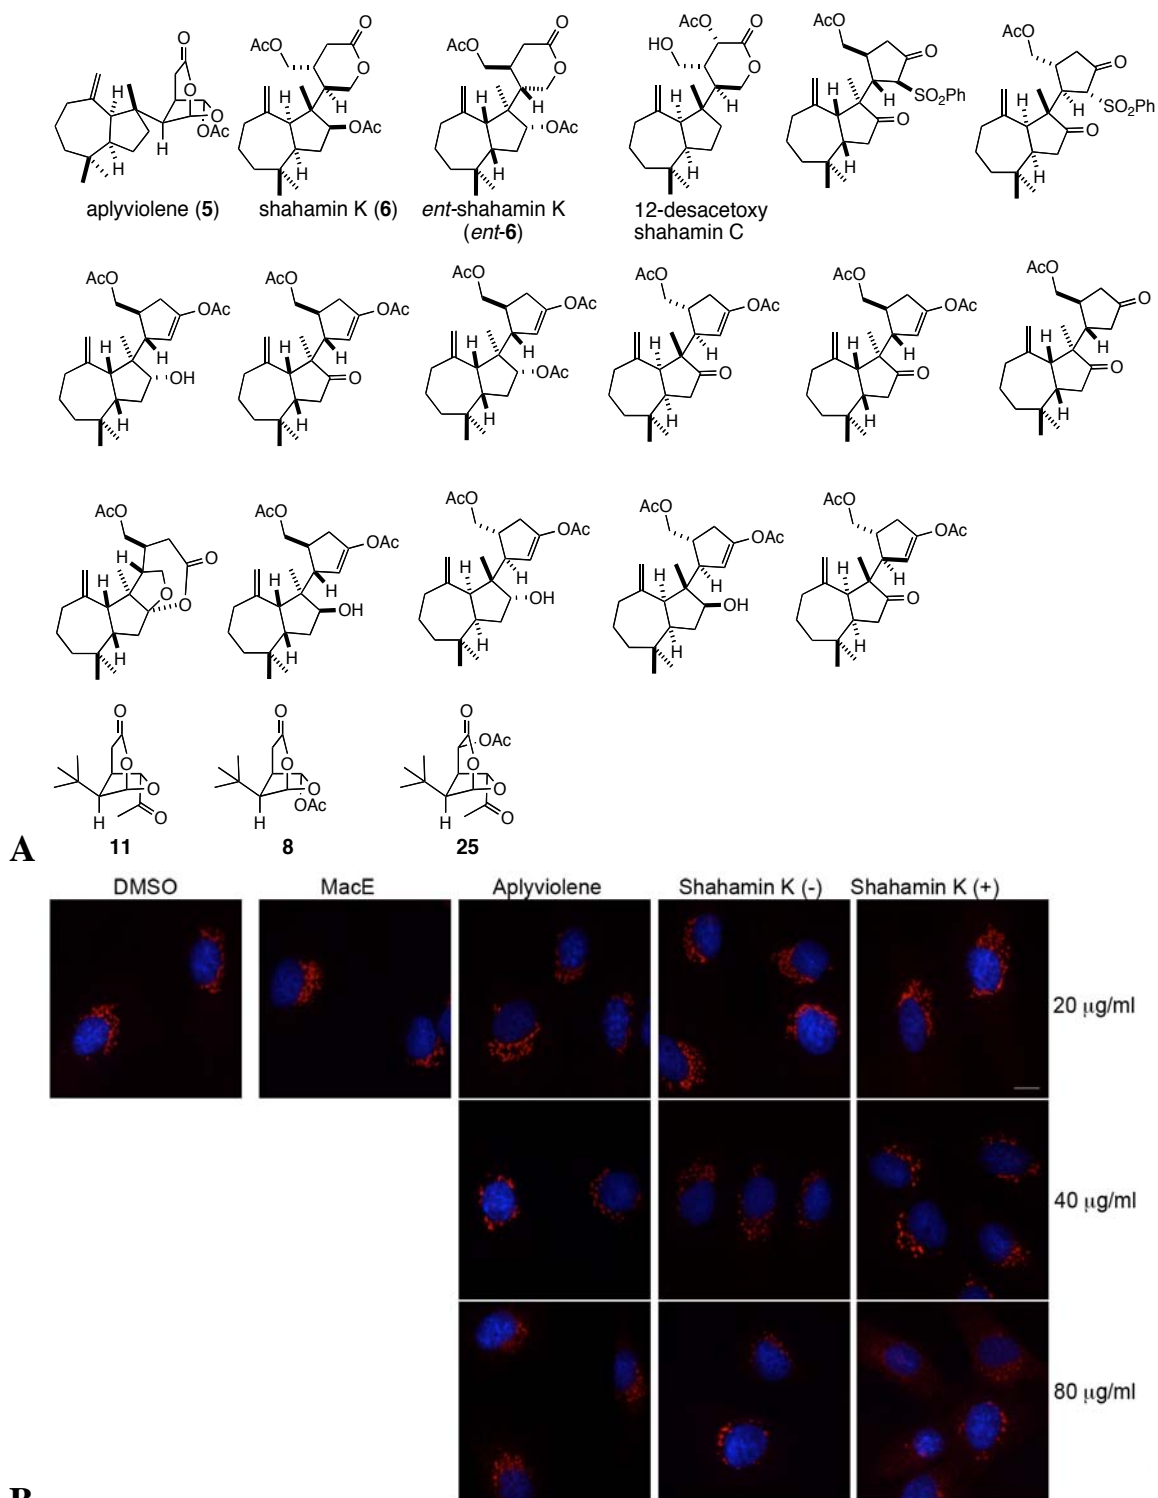

**Fig. S1. Structurally related compounds screened for macfarlandin E-type Golgi activity**  
 NRK cells on coverslips were treated with compounds (A) for 60 min at 37 °C, fixed and processed for immunofluorescence analysis with an antibody to the Golgi protein, giantin, and the DNA dye Hoechst 33342. Representative images for aplyviolene (5), *ent*-(-)-shahamin K (*ent*-6), and (+)-shahamin K (6), is shown (B).

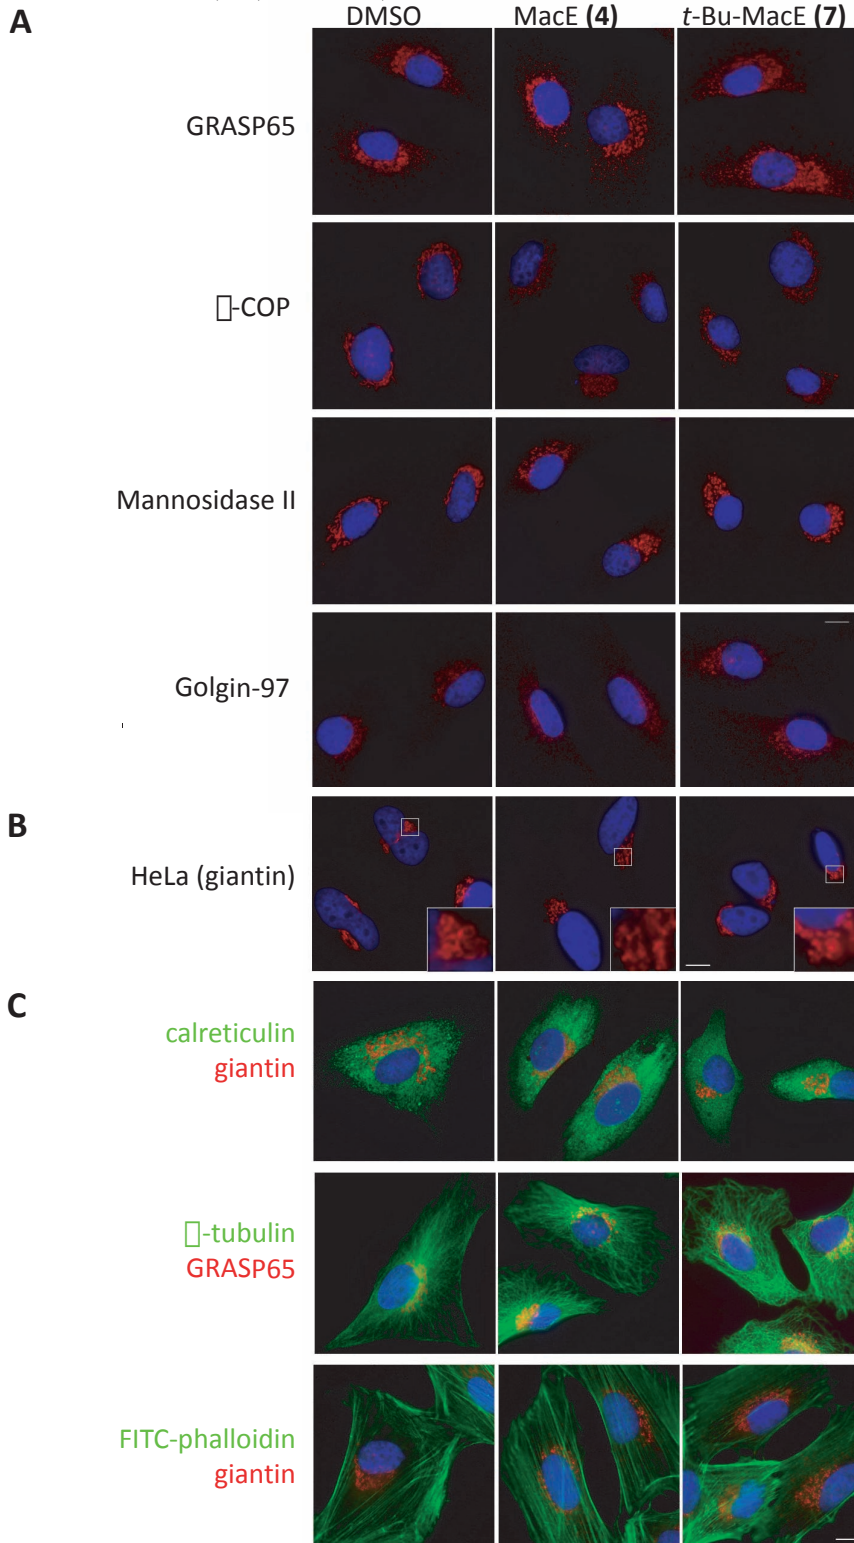

**Fig. S2: The effect of MacE and *t*-Bu-MacE on other Golgi markers, HeLa cells, and other cellular structures**  
 (A) NRK cells on coverslips were treated with DMSO, 20  $\mu$ g/mL MacE and 40  $\mu$ g/mL *t*-Bu-MacE for 60 min, fixed and analyzed by immunofluorescence using antibodies to GRASP65,  $\beta$ -COP, mannosidase-II, and golgin-97 and the DNA dye Hoechst 33342. (B) HeLa cells on coverslips were treated with DMSO, 20  $\mu$ g/mL MacE and 40  $\mu$ g/mL *t*-Bu-MacE for 60 min, fixed and analyzed by immunofluorescence using an antibody to giantin and the DNA dye Hoechst 33342. (C) NRK cells on coverslips were treated with DMSO, 20  $\mu$ g/mL MacE and 40  $\mu$ g/mL *t*-Bu-MacE for 60 min. The cells were fixed and processed for immunofluorescence with antibodies to calreticulin and giantin to visualize the ER or the Golgi, respectively (top panel). Cells were also stained with antibodies to  $\pm$ -tubulin and the Golgi protein, GRASP65, to reveal the organization of the microtubule cytoskeleton and the Golgi (middle panel). FITC-coupled phalloidin was used to visualize the organization of the actin cytoskeleton (bottom panel).

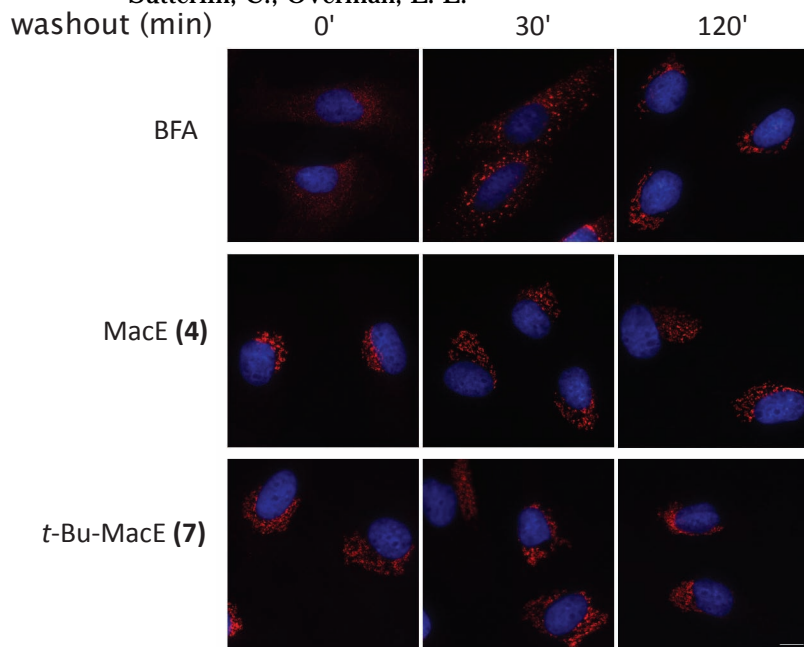

**Fig S3. The effect of MacE and *t*-Bu-MacE on the Golgi is irreversible**

NRK cells were treated with 3  $\mu$ g/mL BFA, 20  $\mu$ g/mL MacE and *t*-Bu-MacE 40  $\mu$ g/mL, followed by washout of the compounds and incubation in fresh medium for 30 or 120 minutes. Cells were then fixed and stained with an antibody to giantin and the DNA dye Hoechst 33342.

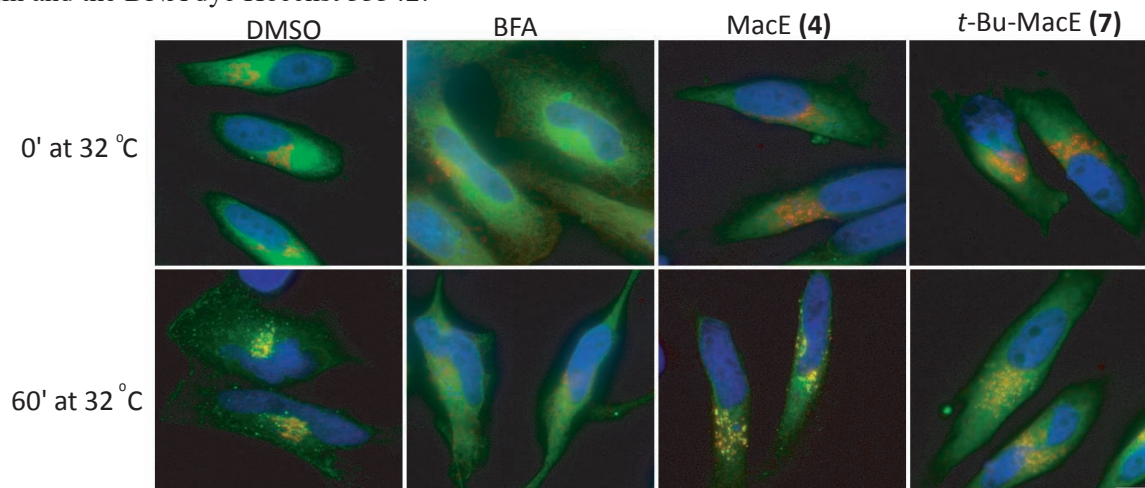

**Fig. S4. MacE and *t*-Bu-MacE block transport between the Golgi and the plasma membrane**

HeLa cells expressing GFP-tagged VSV-G<sup>ts045</sup> were shifted to the non-permissive temperature of 40 °C for 6 hrs, of which the last 1 hr was in the presence of DMSO, 3  $\mu$ g/mL BFA, 20  $\mu$ g/mL MacE or 40  $\mu$ g/mL *t*-Bu-MacE. Cells were then shifted to 32 °C to allow transport from the ER to the Golgi to the plasma membrane. Cells were fixed and stained with an antibody to giantin and the DNA dye Hoechst 33342. Representative images are shown for each experimental condition.

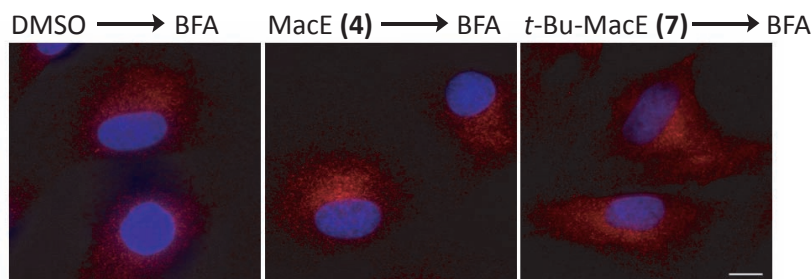

**Fig S5. MacE and *t*-Bu-MacE does not block BFA induced relocalization of Golgi proteins to the ER**

NRK cells were treated with DMSO, 20  $\mu$ g/mL MacE and *t*-Bu-MacE 40  $\mu$ g/mL for 1 hour, followed by replacement with media containing the same agent and 3  $\mu$ g/mL BFA for 45 minutes. Cells were fixed and stained with an antibody to giantin and the DNA dye Hoechst 33342.

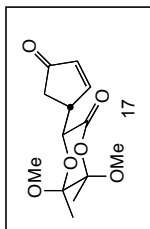

Current Data Parameters  
 USER schmer  
 NAME msi-1191i--rec2  
 EXPNO 1  
 PROCNO 1

F2 - Acquisition Parameters  
 Date\_ 20/09/2023  
 Time 12.51  
 INSTRUM av600  
 PROBED 5 mm TBI 1H/13  
 PULPROG zg30  
 D0 9.936  
 SOLVENT CDCl3  
 NS 17  
 DS 2  
 SWH 9615.385 Hz  
 FIDRES 0.098178 Hz  
 AQ 5.0928259 sec  
 RG 2050  
 DW 52.000 usec  
 DE 6.00 usec  
 TE 298.0 K  
 D1 0.1000000 sec  
 TDO 1

==== CHANNEL f1 =====  
 NUC1 1H  
 P1 8.00 usec  
 PL1 -1.00 dB  
 SFO1 600.1342019 MHz

F2 - Processing Parameters  
 SI 65536  
 SF 600.1300470 MHz  
 WDW EM  
 SSB 0  
 LB 0.30 Hz  
 GB 0  
 PC 1.00

ID NMR plot parameters  
 CX 22.80 cm  
 CY 49.07 cm  
 F1P 9.000 ppm  
 F1 5401.17 Hz  
 F2P -1.089 ppm  
 F2 -653.78 Hz  
 PPMXCH 0.44252 ppm/cm  
 HZCH 265.56808 Hz/cm

1H spectrum

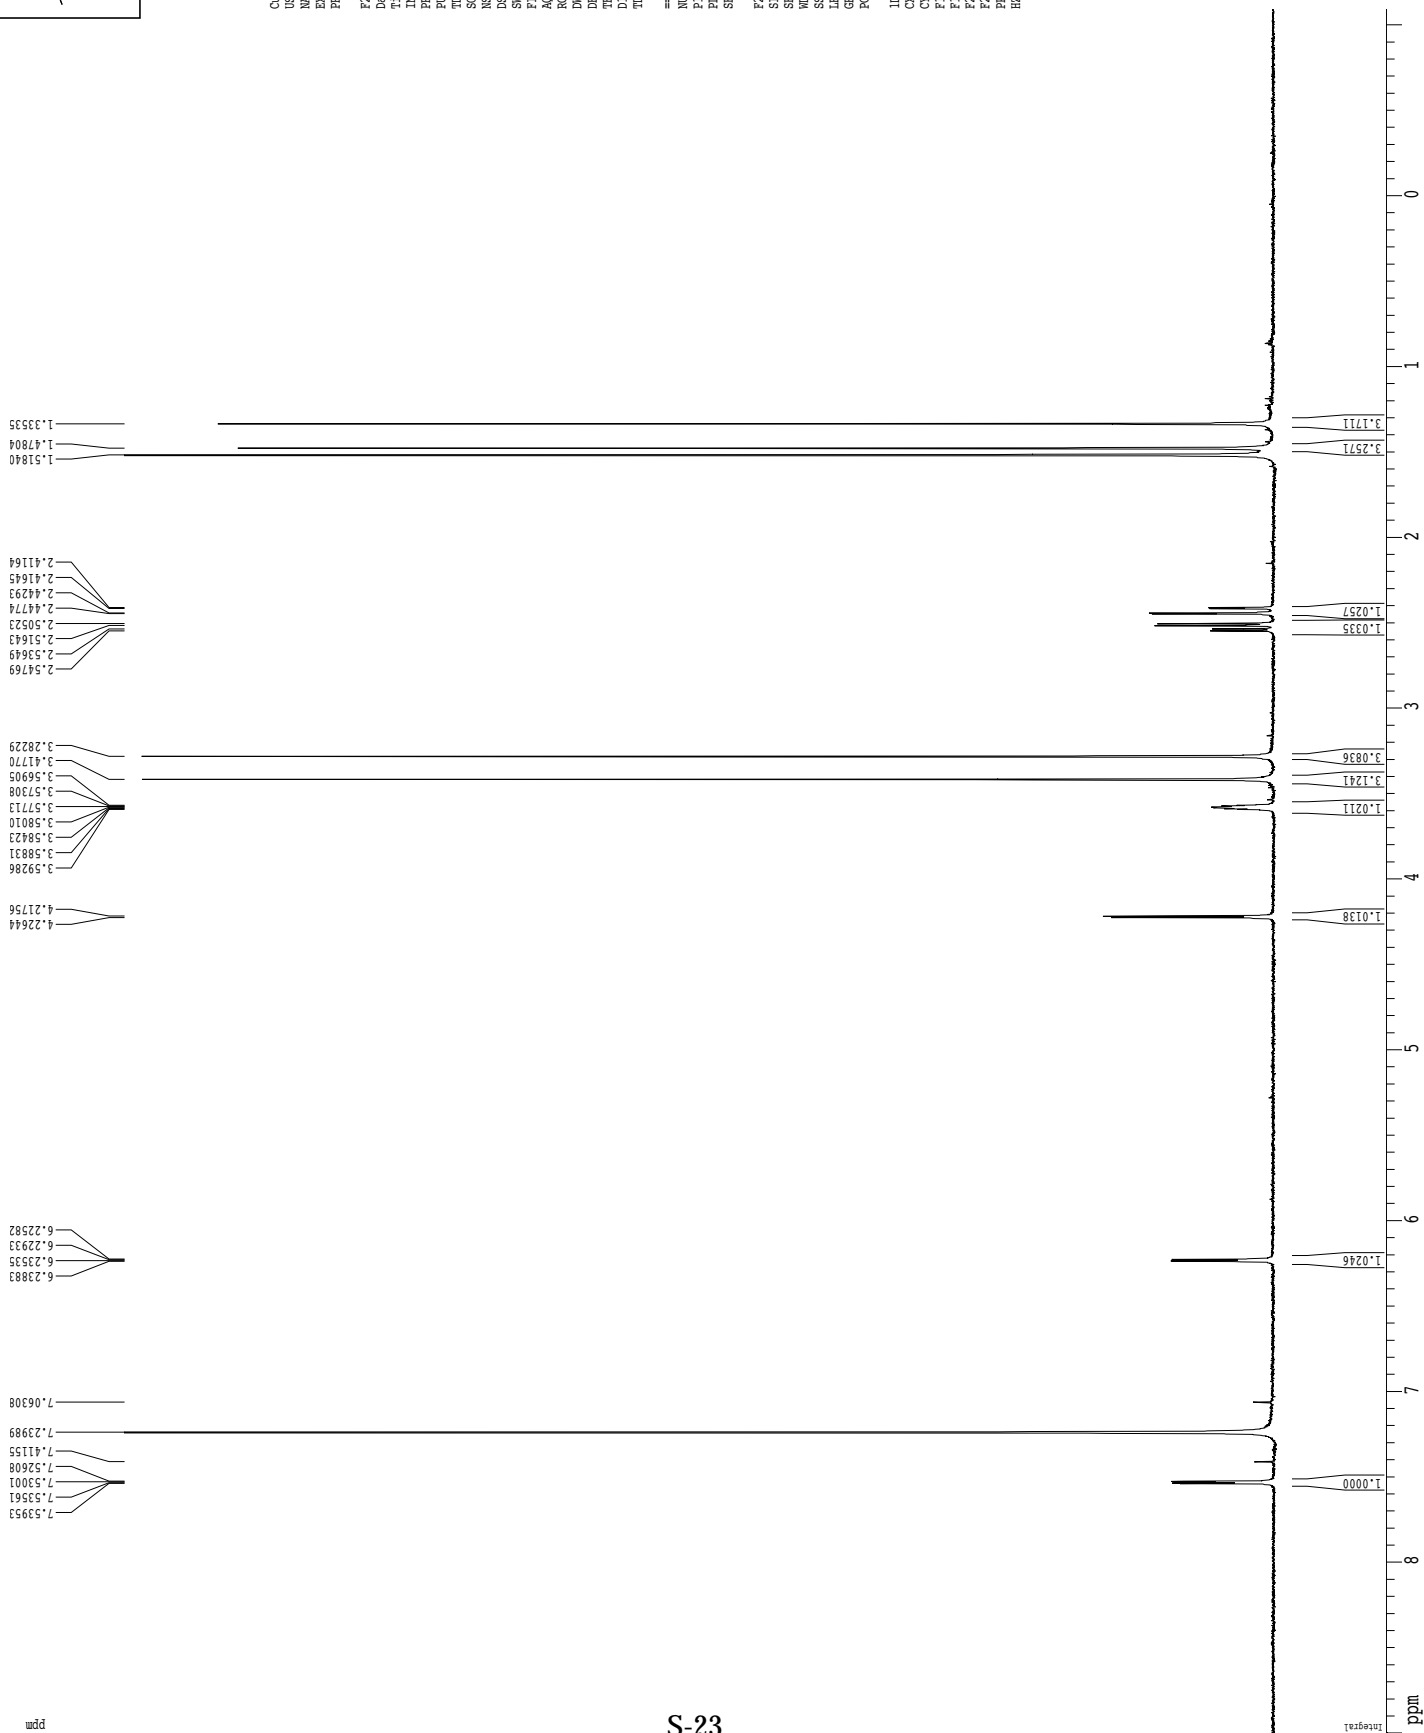

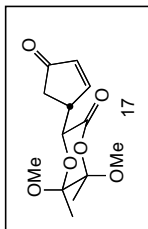

<sup>13</sup>C spectrum with <sup>1</sup>H decoupling

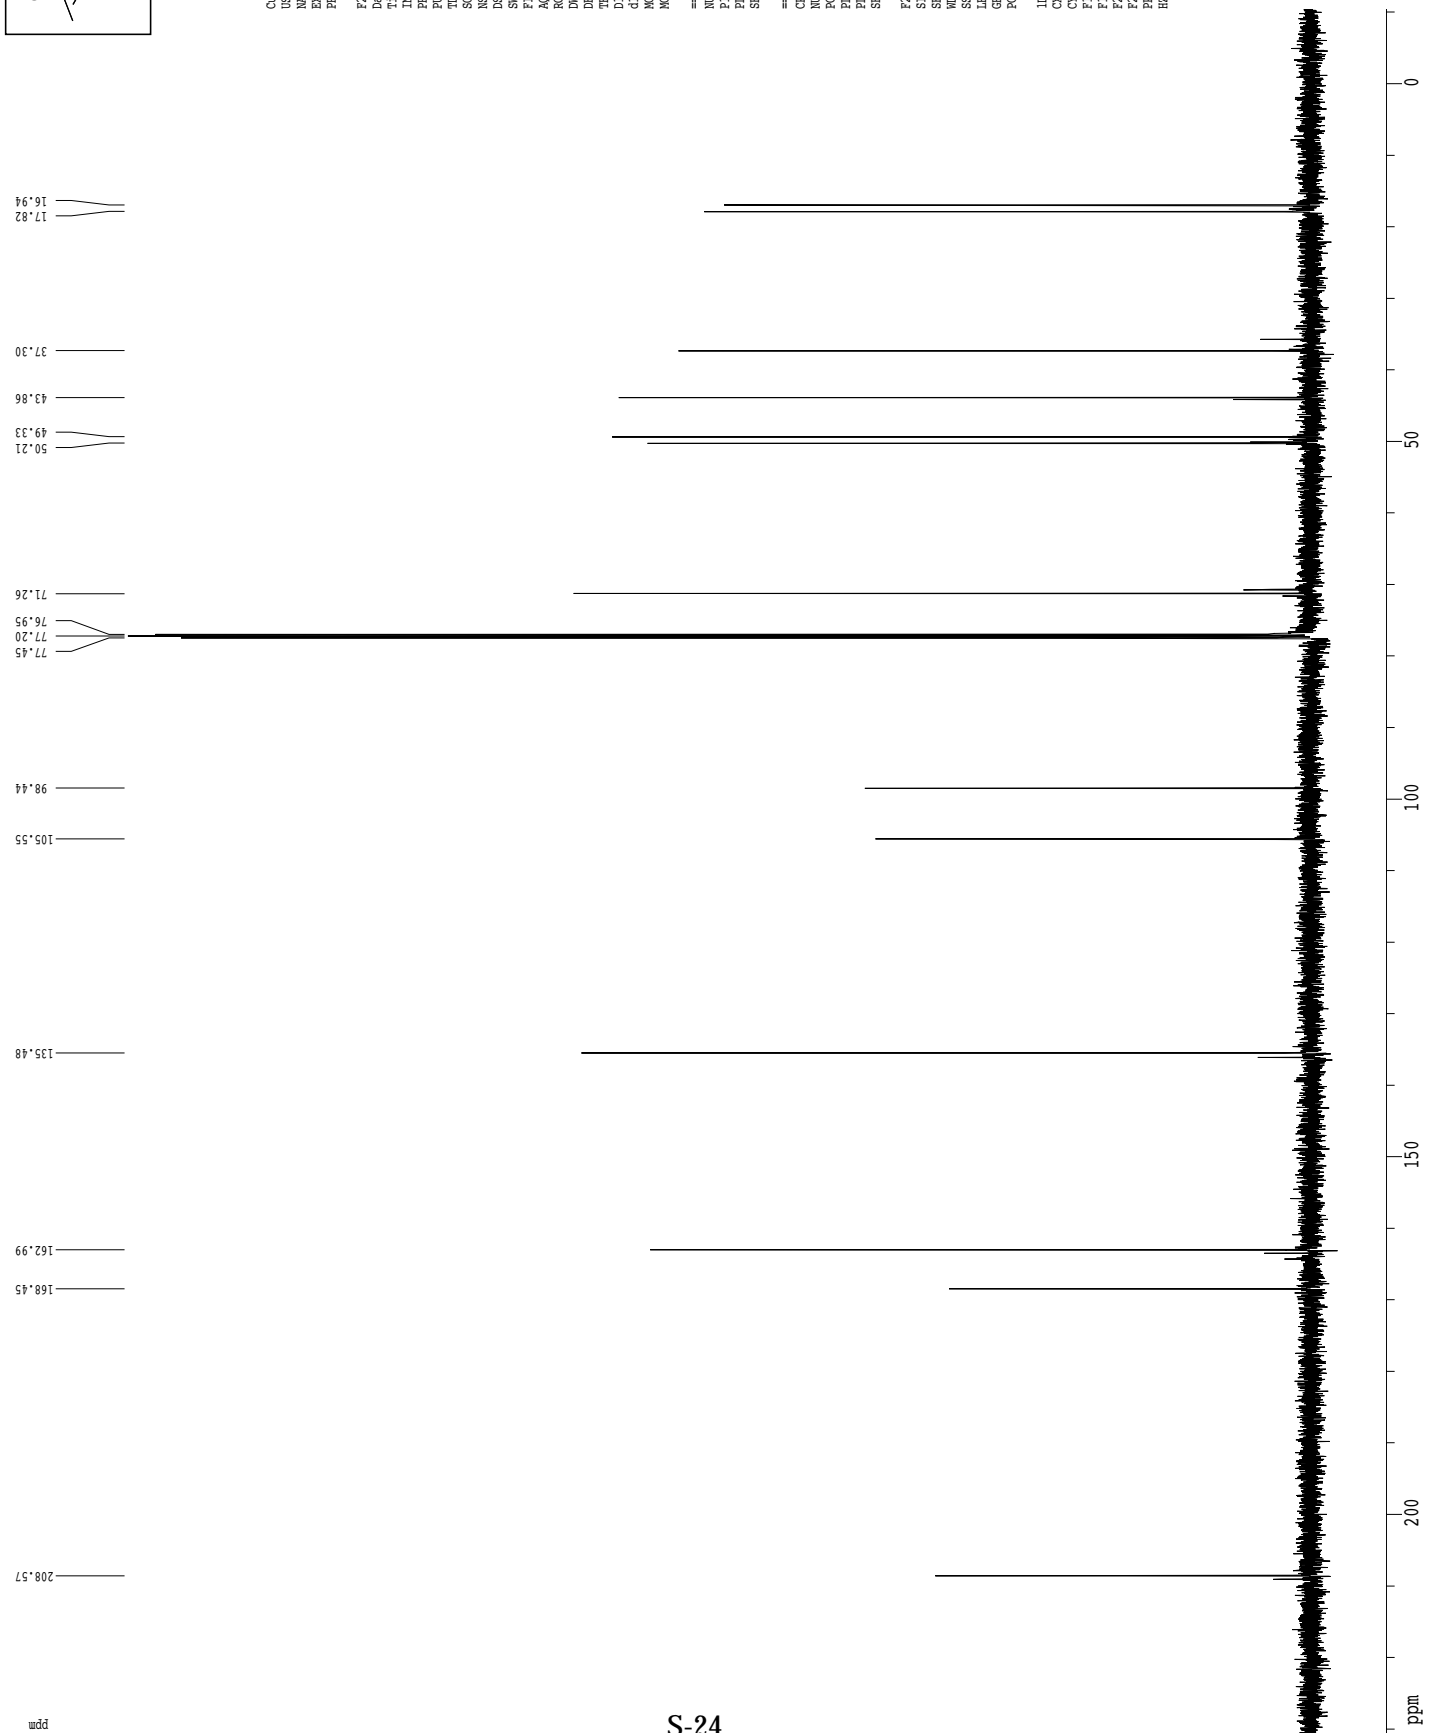

Current Data Parameters  
 USER chrisab  
 NAME cmb1253z  
 EXPNO 13  
 PROCNO 1

F2 - Acquisition Parameters  
 Date\_ 20161219  
 Time 17:43  
 INSTRUM cryo-2  
 PROBRD 5 mm CPDQX 1H-  
 PULPROG zgpg30  
 TD 65536  
 SOLVENT CDCl3  
 NS 16  
 DS 4  
 SWH 30303.031 Hz  
 FIDRES 0.462388 Hz  
 AQ 1.0813940 sec  
 RG 13004  
 DW 16.500 usec  
 DE 6.00 usec  
 TE 298.0 K  
 d1 3.0000000 sec  
 d11 0.0300000 sec  
 ACRESF 0.0000000 sec  
 ACPRK 0.0130000 sec

===== CHANNEL f1 =====  
 NUC1 <sup>13</sup>C  
 P1 15.00 usec  
 PL1 -1.00 dB  
 SFO1 125.7942548 MHz

===== CHANNEL f2 =====  
 CPDPRG2 waltz16  
 NUC2 <sup>1</sup>H  
 PCPD2 100.00 usec  
 PL2 1.60 dB  
 PL12 23.54 dB  
 SFO2 500.2225011 MHz

F2 - Processing parameters  
 SI 65536  
 SF 125.7804099 MHz  
 EQ  
 SSB 0  
 LB 1.00 Hz  
 GB 0  
 PC 2.00

ID NMR plot parameters  
 CX 22.80 cm  
 CY 15.65 cm  
 F1P 230.532 ppm  
 F1 28996.44 Hz  
 F2P -10.388 ppm  
 F2 -1306.60 Hz  
 PPMCH 10.56667 ppm/cm  
 HZCH 1329.08044 Hz/cm



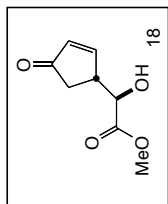

Current Data Parameters  
 USER schner  
 NAME ms02-86-11-3  
 EXPNO 1  
 PROCNO 1

F2 - Acquisition Parameters  
 Date\_ 20100902  
 Time 16.49  
 INSTRUM cryo500  
 PROBHD 5 mm CPXI 1H-  
 PULPROG zg30  
 TD 81728  
 SOLVENT CDCl3  
 NS 18  
 DS 2  
 SWH 8012.820 Hz  
 FIDRES 0.098043 Hz  
 AQ 5.099774 sec  
 RG 327  
 DE 62.60 usec  
 TE 298.0 K  
 D1 0.10000000 sec  
 MCREST 0.00000000 sec  
 MCWRR 0.01500000 sec

==== CHANNEL f1 =====  
 NUC1 1H  
 P1 7.50 usec  
 PL1 1.60 dB  
 SFO1 500.2235015 MHz

F2 - Processing parameters  
 SI 65535  
 SF 500.2200432 MHz  
 WDW EM  
 SSB 0  
 LB 0.30 Hz  
 GB 0  
 PC 4.00

1D NMR plot parameters  
 CX 22.80 cm  
 CY 15.00 cm  
 FIP 10.850 ppm  
 F2 5427.40 Hz  
 F3 -353.99 ppm  
 PPM0 0.50686 ppm/cm  
 HZCM 253.54352 Hz/cm

1.58714  
 2.35630  
 2.36165  
 2.39377  
 2.39910  
 2.45848  
 2.47174  
 2.49588  
 2.50917  
 2.77597  
 2.78834  
 3.33235  
 3.33761  
 3.34966  
 3.35595  
 3.36106  
 3.83051  
 3.83101  
 4.23423  
 4.24596  
 4.25743  
 6.26405  
 6.26805  
 6.27548  
 6.27948  
 7.23996  
 7.47544  
 7.48022  
 7.48686  
 7.49166

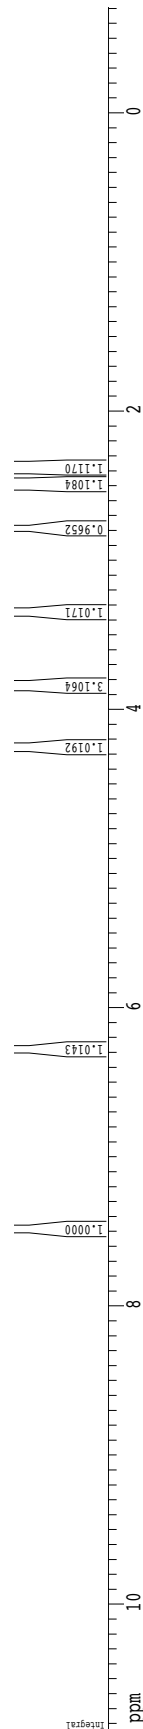

1H spectrum

ppm

Integration

ppm

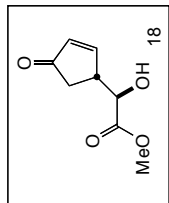

```

Current Data Parameters
USER      chrisb
NAME      cmb2024
EXPNO     14
PROCNO    1

F2 - Acquisition Parameters
Date_     20061221
Time      22:11
INSTRUM   cryo
PROBHD    5 mm CPDQCT 1H-
PULPROG   zgpg30
TD         65418
SOLVENT   CDCl3
NS         16
DS         4
SWH        30303.031 Hz
FIDRES     0.463222 Hz
AQ         1.0794470 sec
RG         13004
DE         6.00 usec
TE         298.0 K
d1         5.0000000 sec
d11        0.0300000 sec
d12        0.0000000 sec
d13        0.0100000 sec
===== CHANNEL f1 =====
NUC1       13C
P1         15.00 usec
PL1        -1.00 dB
SFO1       125.7942548 MHz

===== CHANNEL f2 =====
CPDPRG2   waltz16
NUC2       1H
PCPD2     100.00 usec
PL2        1.60 dB
PL12       23.54 dB
SFO2       500.2225011 MHz

F2 - Processing parameters
SI         65536
SF         125.780440 MHz
AQ         5.00
SFO        125.780440 MHz
GB         0
PC         2.00

ID NMR plot parameters
CX         22.80 cm
CY         15.65 cm
F1P        230.573 ppm
F1         29001.52 Hz
F2P        -10.348 ppm
F2         -1301.51 Hz
PPMCHN    10.56667 ppm/cm
HZCHN     1329.08044 Hz/cm
    
```

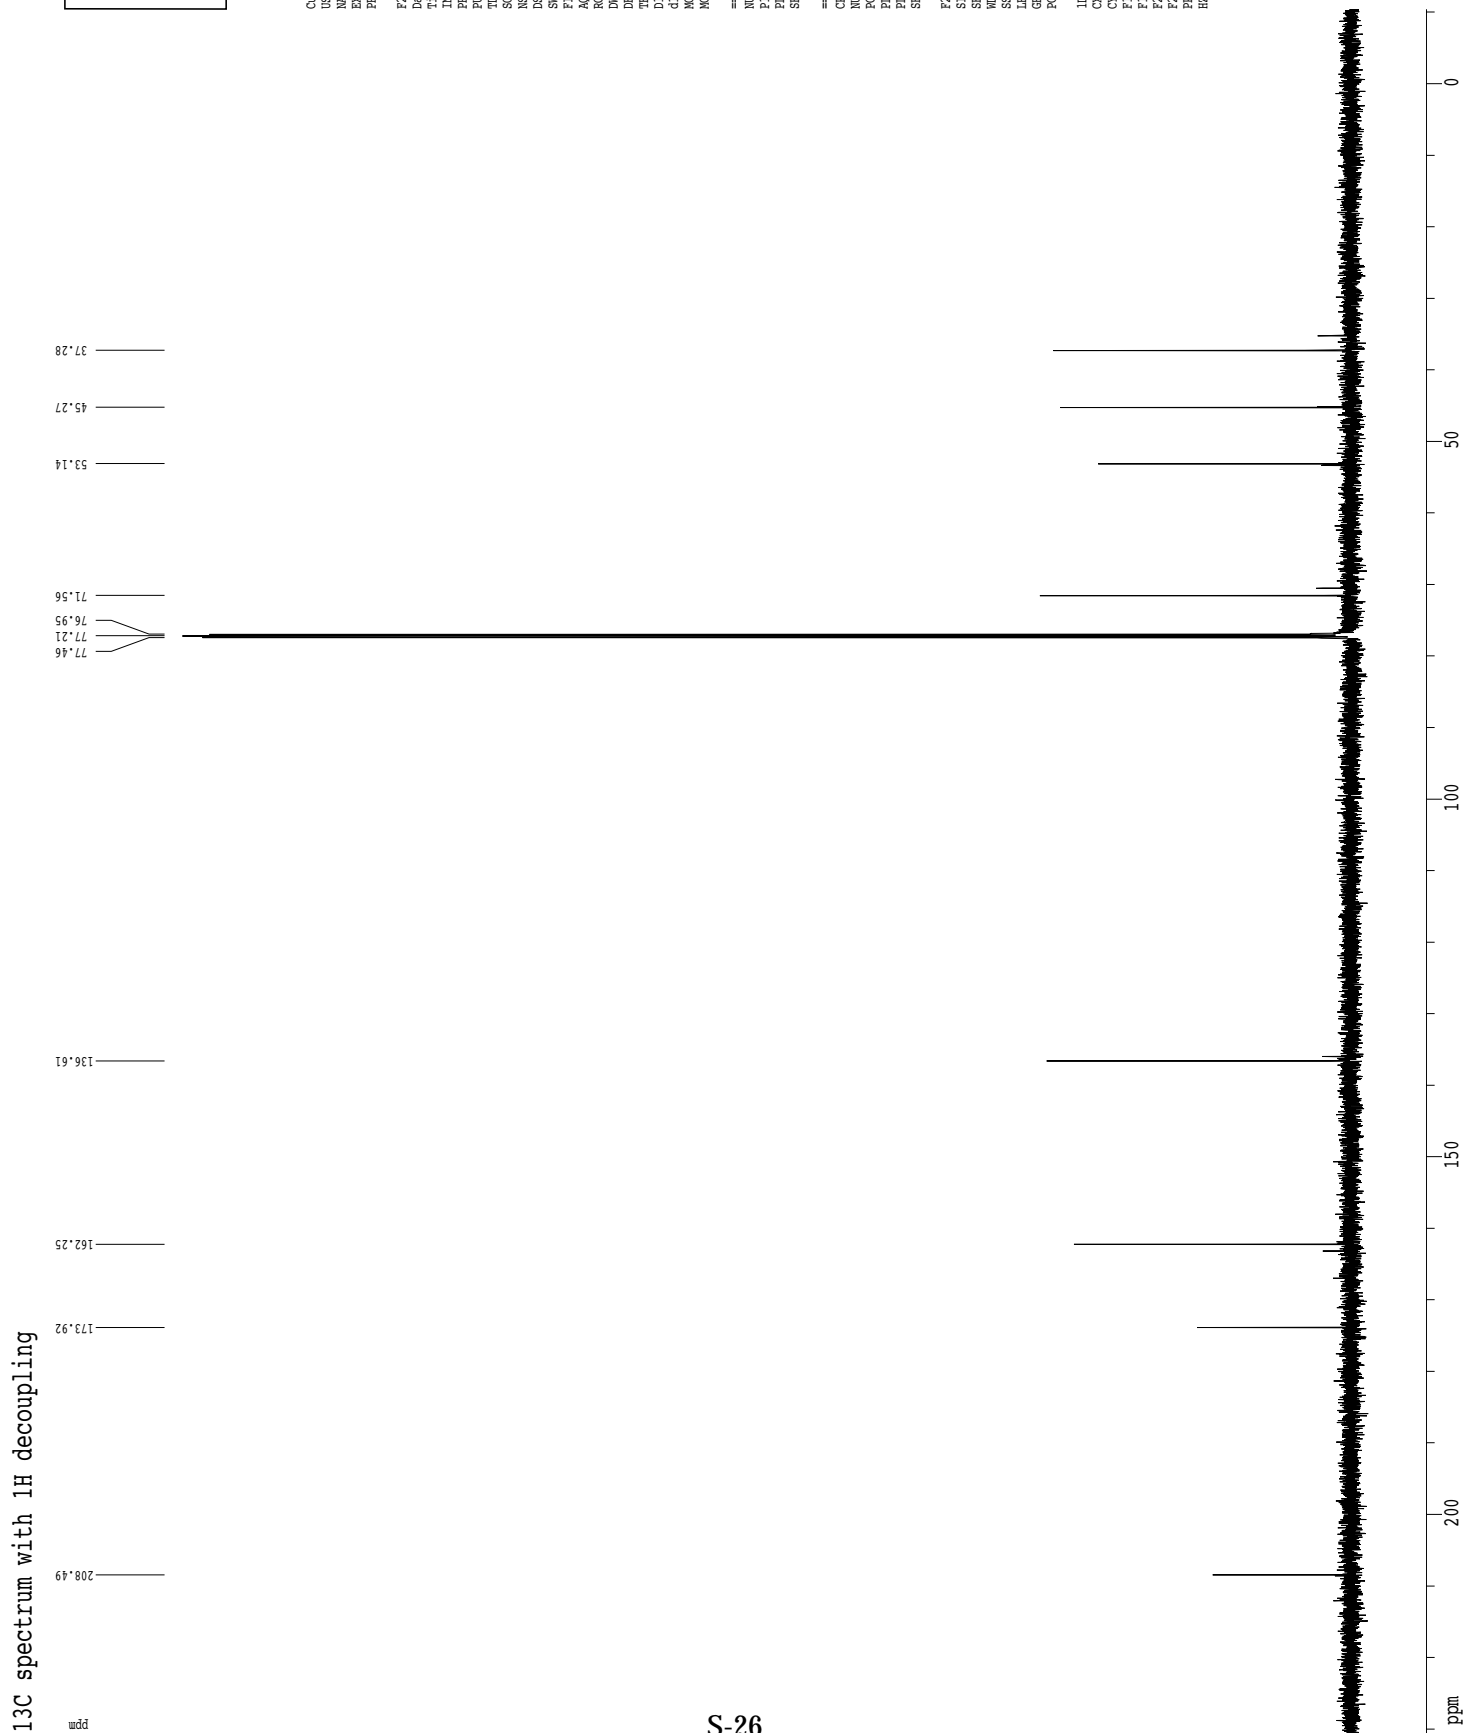

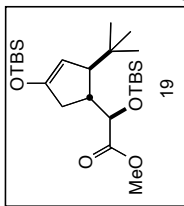

Current Data Parameters  
 USER chrisb  
 NAME cmb206  
 EXPNO 2  
 PROCNO 1

F2 - Acquisition Parameters  
 Date\_ 20070309  
 Time 15.09  
 INSTRUM cryo500  
 PROBHD 5 mm CPXI 1H-  
 PULPROG zg30  
 TD 81728  
 SOLVENT CDCl3  
 NS 8  
 DS 2  
 SWH 8012.820 Hz  
 FIDRES 0.098043 Hz  
 AQ 5.099774 sec  
 RG 71  
 DW 6.00 usec  
 DE 6.00 usec  
 TE 298.0 K  
 D1 0.10000000 sec  
 MCREST 0.00000000 sec  
 MCPRK 0.01500000 sec

==== CHANNEL f1 =====  
 NUC1 1H  
 P1 8.00 usec  
 PL1 1.00 dB  
 SFO1 500.2235015 MHz

F2 - Processing parameters  
 SI 32768  
 SF 500.220415 MHz  
 DS 4  
 WDW EM  
 SSB 0  
 LB 0.30 Hz  
 GB 0  
 PC 1.00

1D NMR plot parameters  
 CX 22.80 cm  
 CY 15.00 cm  
 FIP 10.000 ppm  
 F2 500.220 Hz  
 F3 10.000 ppm  
 F4 -500.32 ppm  
 PPMCM 0.48246 ppm/cm  
 HZCM 241.33423 Hz/cm

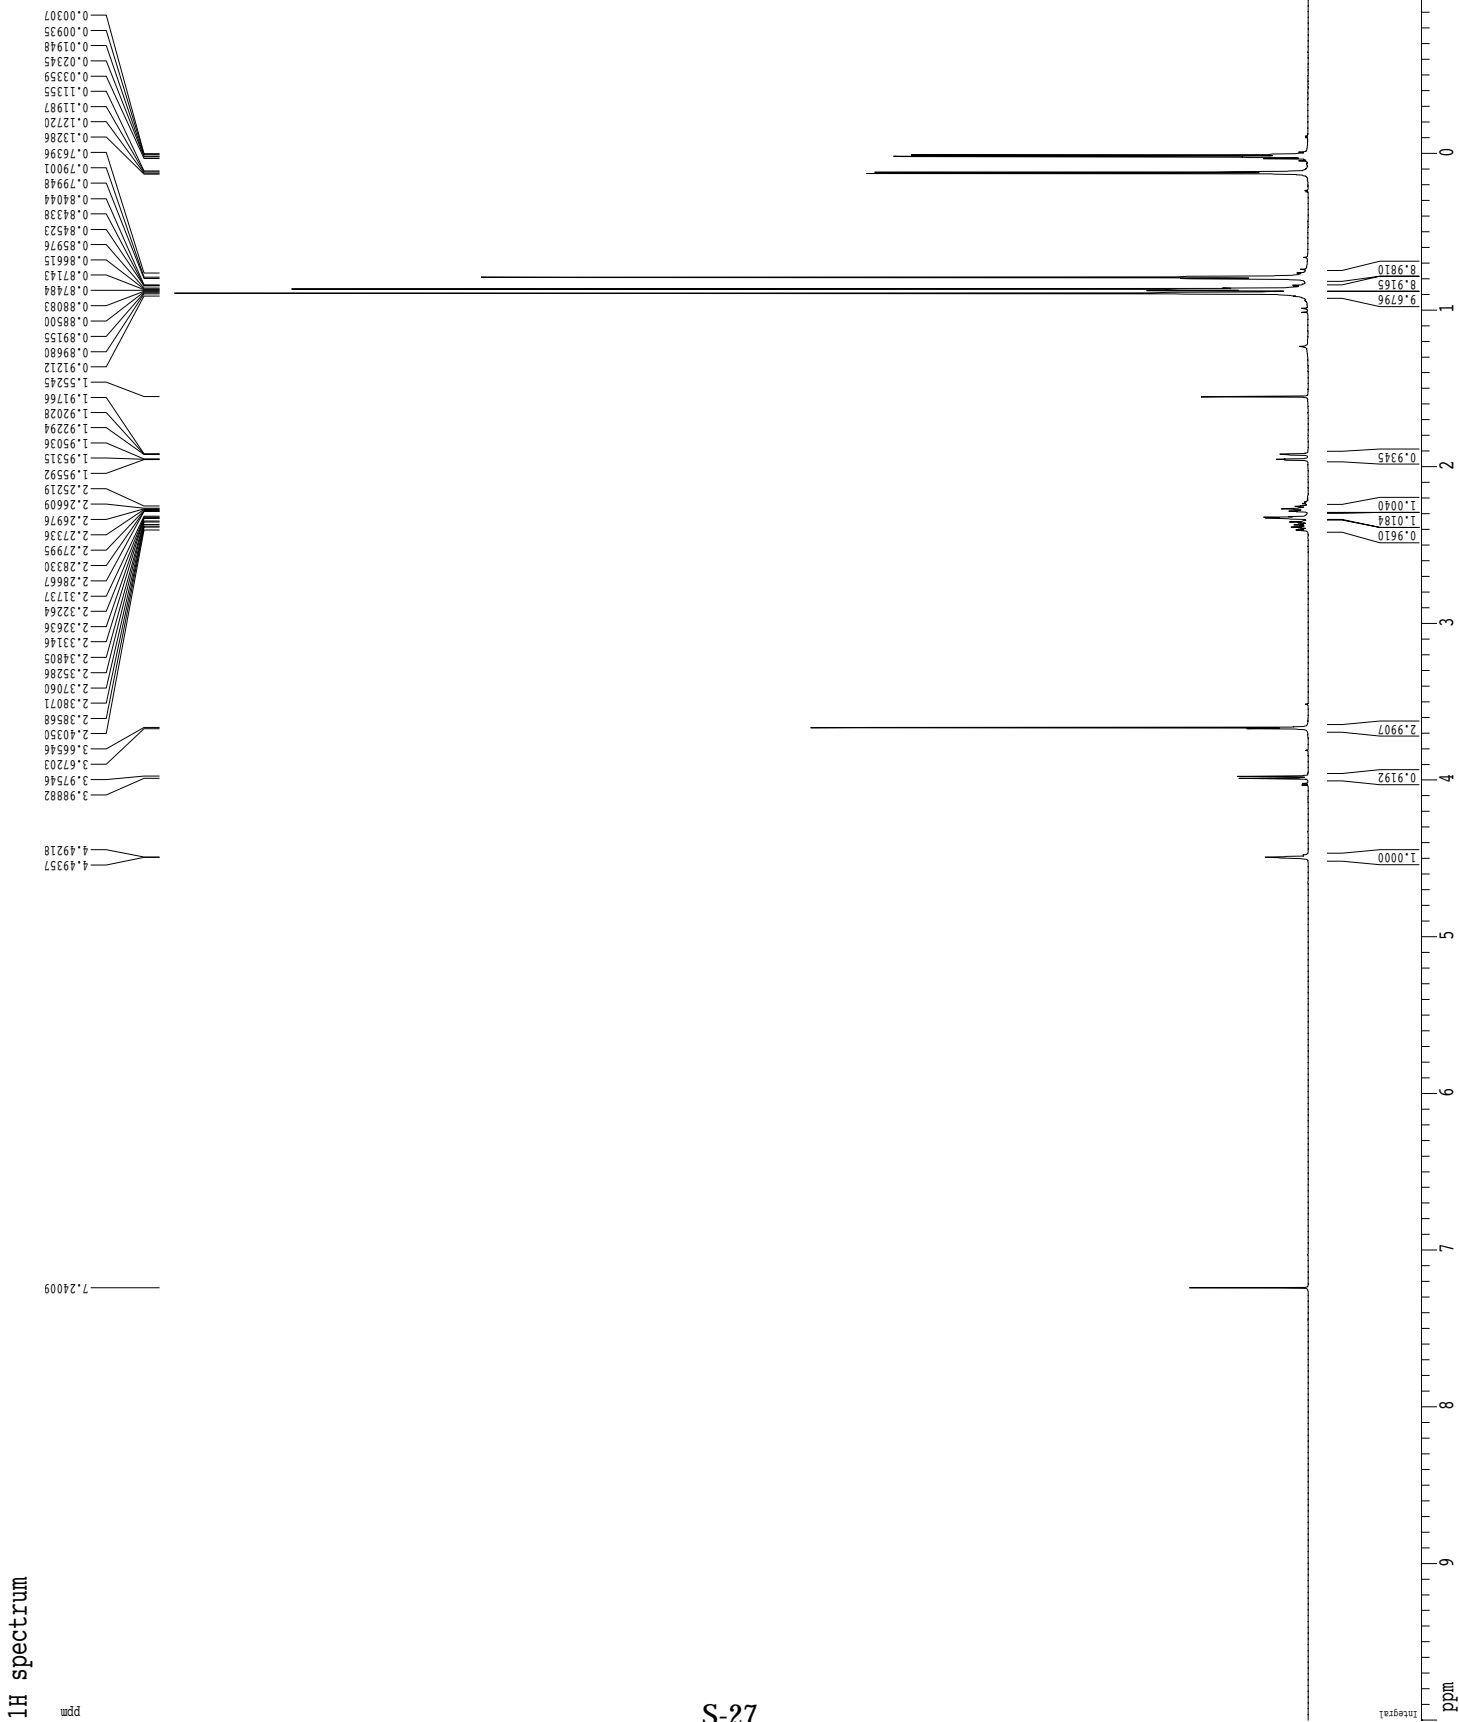

<sup>1</sup>H spectrum

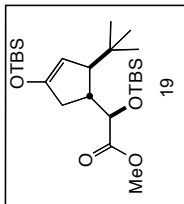

Current Data Parameters  
 USER chrisab  
 NAME cmb2086  
 EXPNO 14  
 PROCNO 1

F2 - Acquisition Parameters  
 Date\_ 20070309  
 Time 15:11  
 INSTRUM spect  
 PROBRD 5 mm CPDCT 1H-  
 PULPROG zgpg30  
 TD 65418  
 SOLVENT CDCl3  
 NS 27  
 DS 4  
 SWH 30303.031 Hz  
 FIDRES 0.463222 Hz  
 AQ 1.0794470 sec  
 RG 91195.2  
 DW 16.500 usec  
 DE 6.00 usec  
 TE 298.0 K  
 d1 5.0000000 sec  
 d11 0.0300000 sec  
 ACQSF 0.0000000 sec  
 ACPRK 0.0100000 sec

==== CHANNEL f1 =====  
 NUC1 13C  
 P1 15.00 usec  
 PL1 -1.00 dB  
 SFO1 125.7942548 MHz

==== CHANNEL f2 =====  
 CPDPRG2 waltz16  
 NUC2 1H  
 PCPD2 100.00 usec  
 PL2 1.60 dB  
 PL12 23.54 dB  
 SFO2 500.2225011 MHz

F2 - Processing parameters  
 SI 6536  
 SF 125.7804021 MHz  
 EQ  
 SSB 0  
 LB 1.00 Hz  
 GB 0  
 PC 2.00

ID NMR plot parameters  
 CX 22.80 cm  
 CY 40.00 cm  
 F1P 230.395 ppm  
 F1 28979.13 Hz  
 F2P -10.525 ppm  
 F2 -1323.90 Hz  
 PPMCH 10.56667 ppm/cm  
 HZCH 1329.08008 Hz/cm

13C spectrum with 1H decoupling

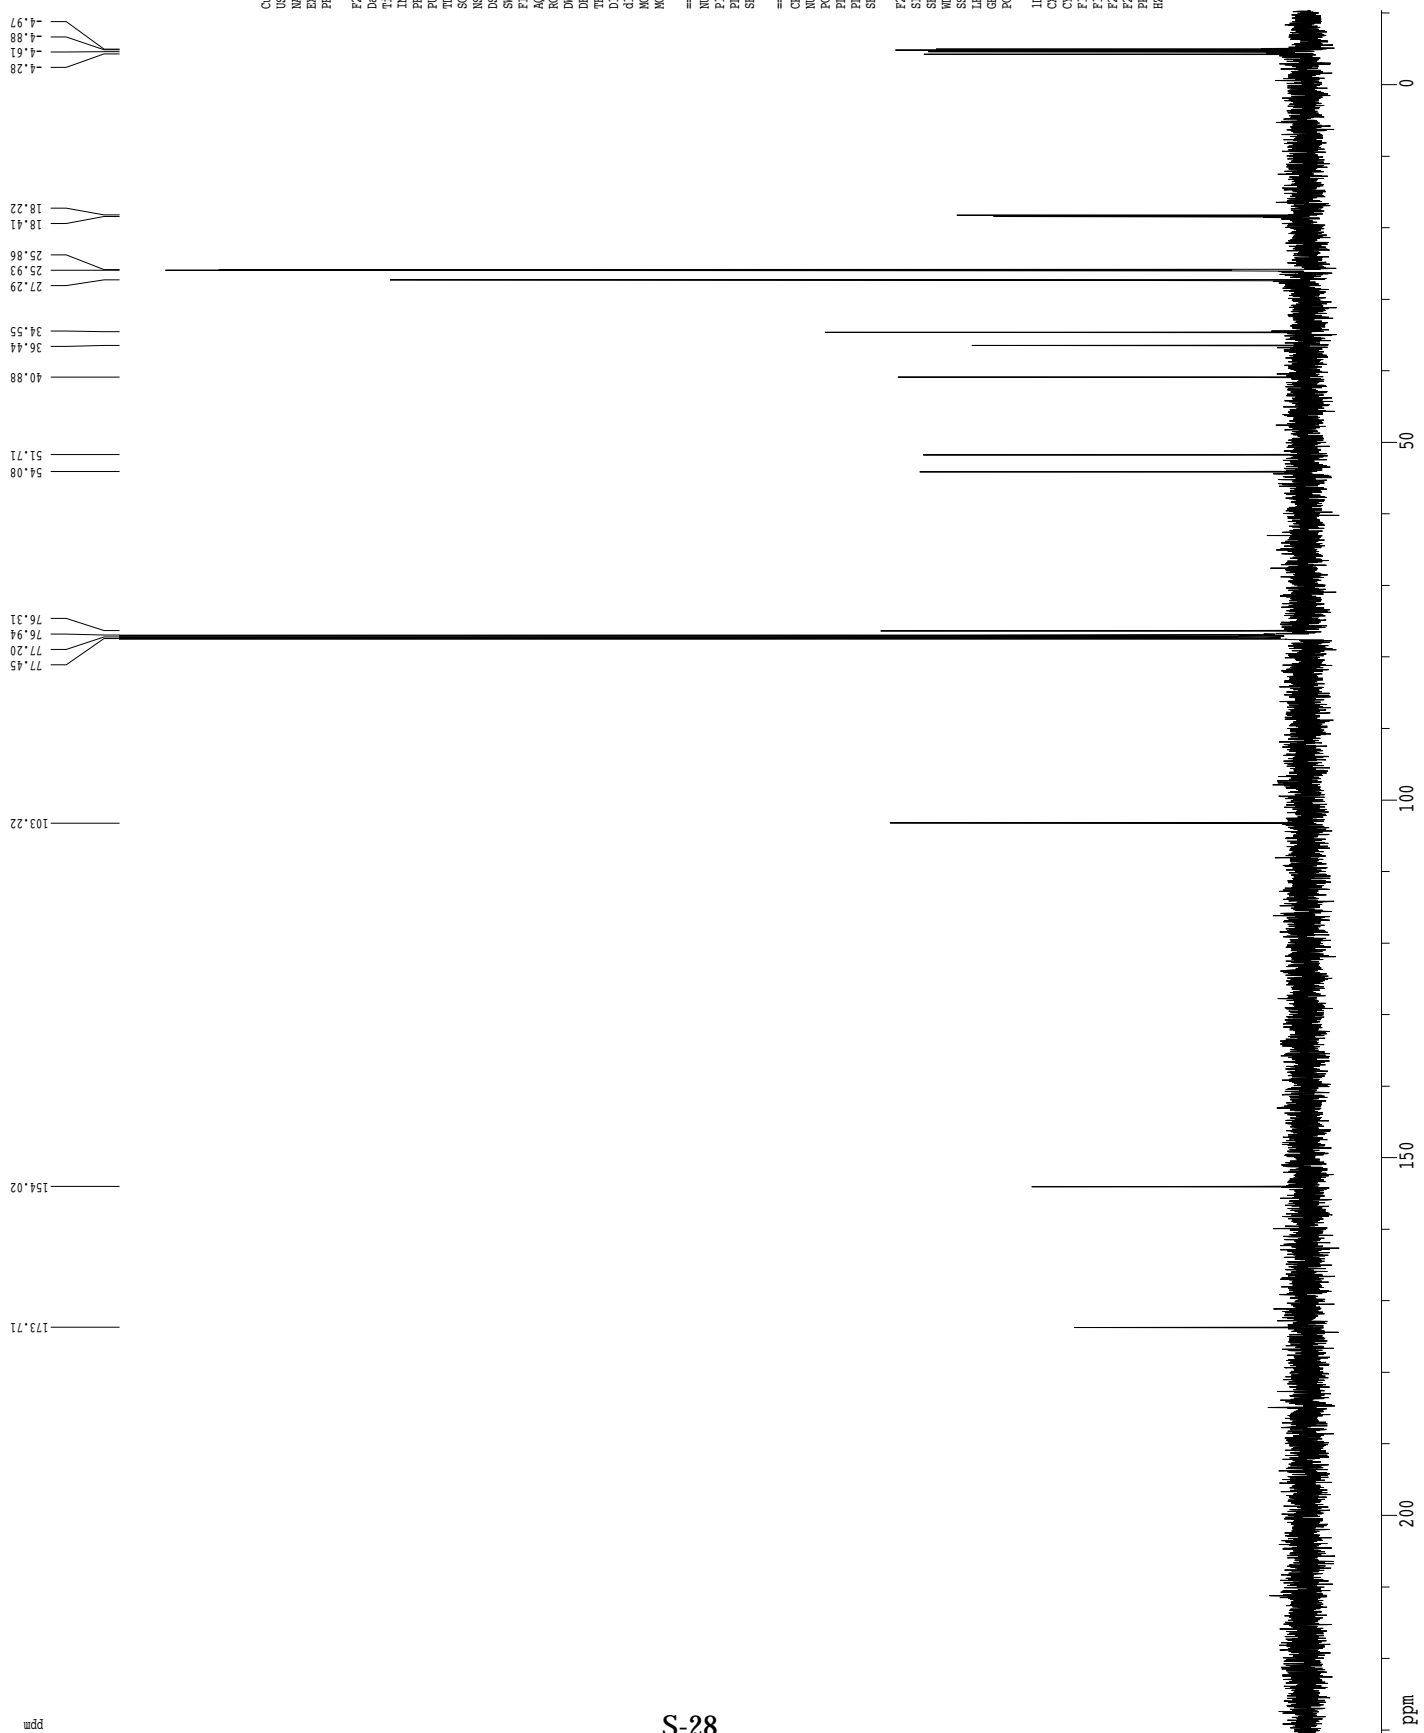

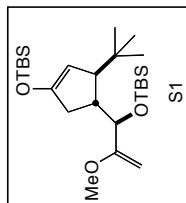

Current Data Parameters  
 USER chrisb  
 NAME cmb1122-2d  
 EXPNO 1  
 PROCNO 1

F2 - Acquisition Parameters  
 Date\_ 20080516  
 Time 14.68  
 INSTRUM cryo500  
 PROBHD 5 mm CPXI 1H-  
 PULPROG zg30  
 TD 81728  
 SOLVENT CDCl3  
 NS 8  
 DS 2  
 SWH 8012.820 Hz  
 FIDRES 0.098043 Hz  
 AQ 5.099874 sec  
 RG 3.6  
 DR 62.60 usec  
 DE 6.00 usec  
 TE 298.0 K  
 D1 0.1000000 sec  
 MCREST 0.0000000 sec  
 MCWRK 0.0150000 sec

==== CHANNEL f1 =====  
 NUC1 1H  
 P1 7.38 usec  
 PL1 1.00 dB  
 SFO1 500.2235015 MHz

F2 - Processing parameters  
 SI 65536  
 SF 500.220408 MHz  
 WDW EM  
 SSB 0  
 LB 0.30 Hz  
 GB 0  
 PC 4.00

1D NMR plot parameters  
 CX 22.80 cm  
 CY 15.00 cm  
 FIP 8.955 ppm  
 F2 4479.51 Hz  
 F2 4479.51 Hz  
 F2 -15.62 ppm  
 FPCMN 0.40632 ppm/cm  
 HZCN 203.25117 Hz/cm

<sup>1</sup>H spectrum

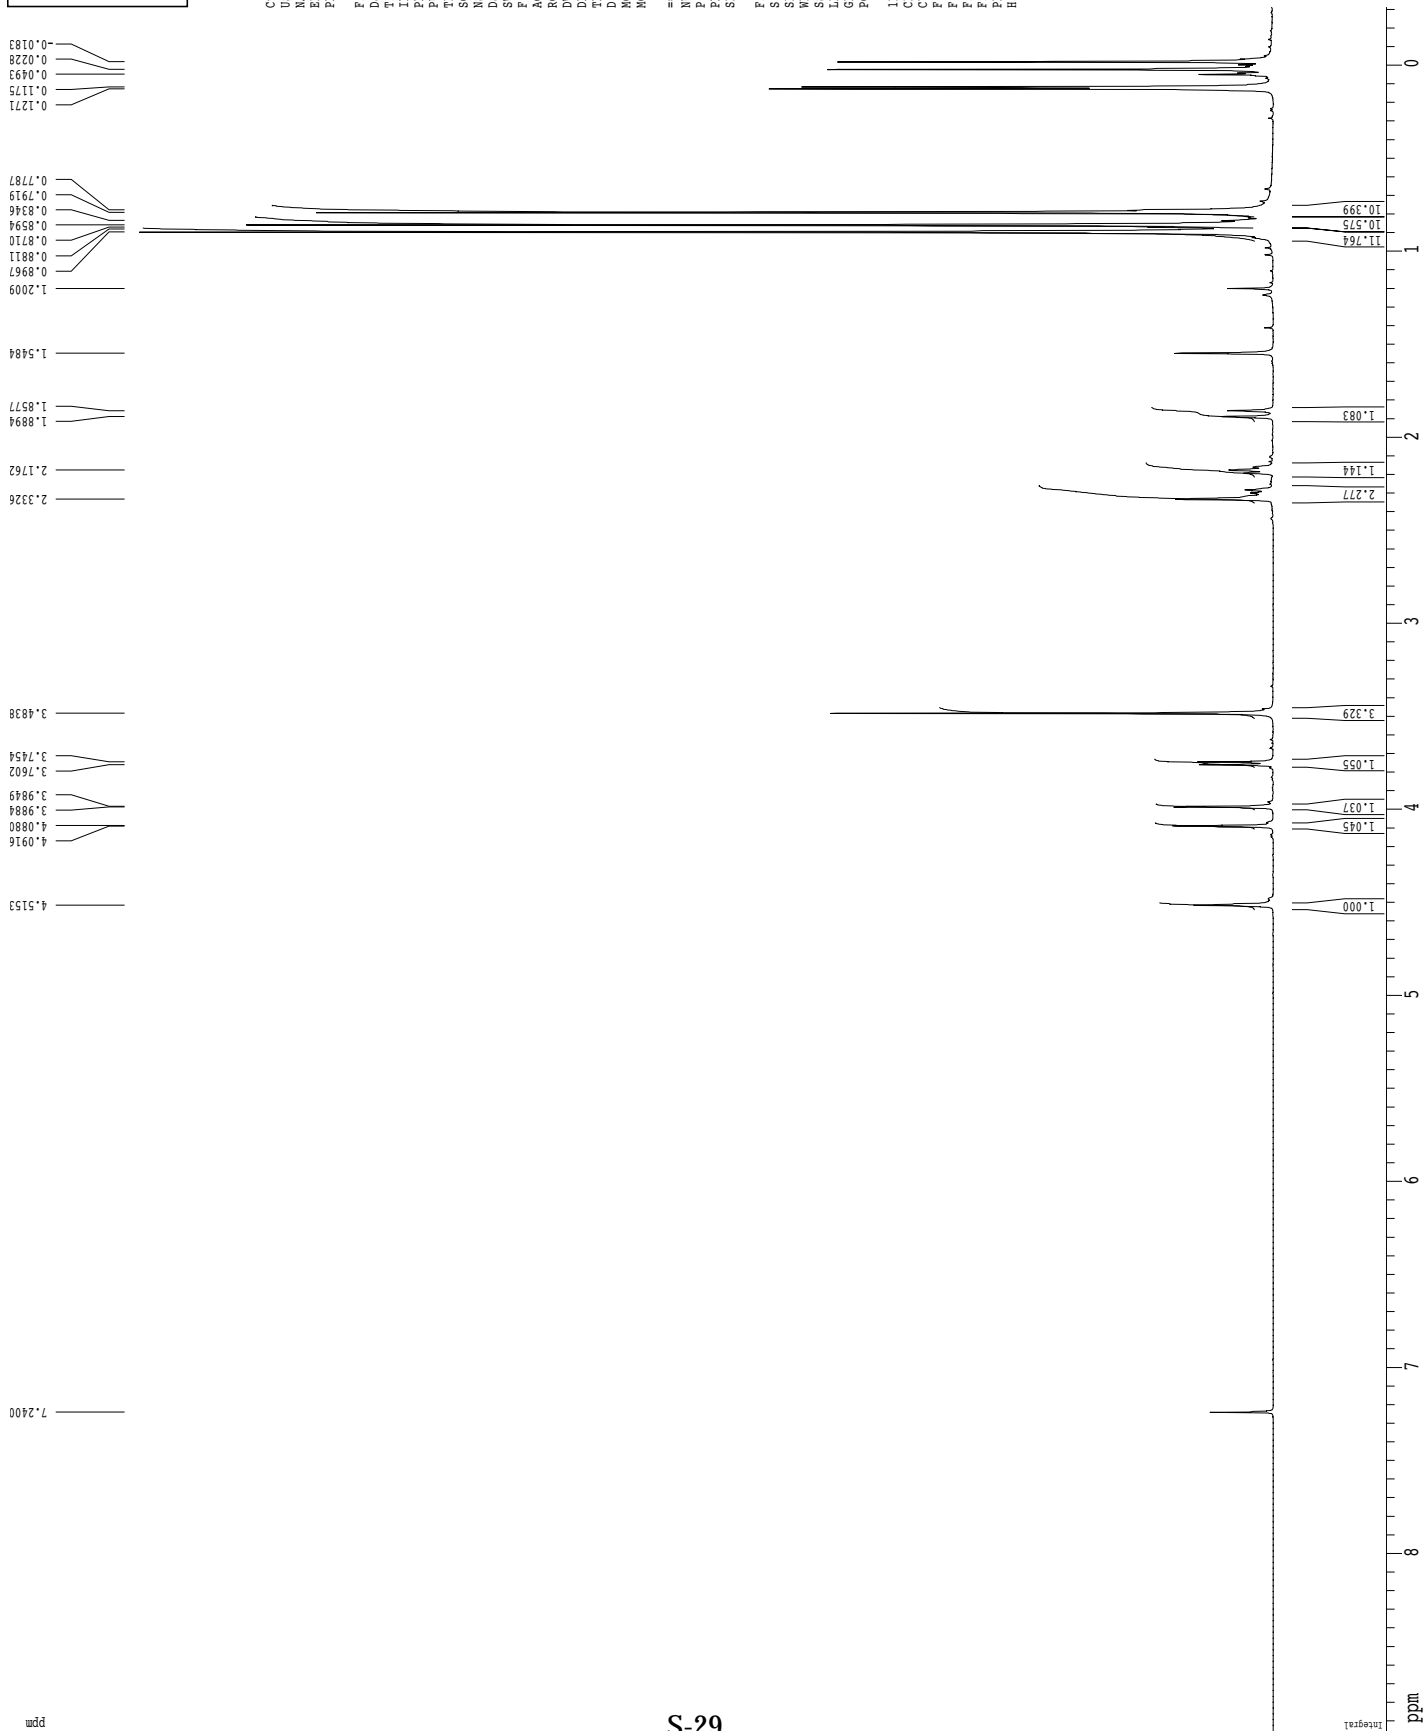

<sup>13</sup>C spectrum with <sup>1</sup>H decoupling

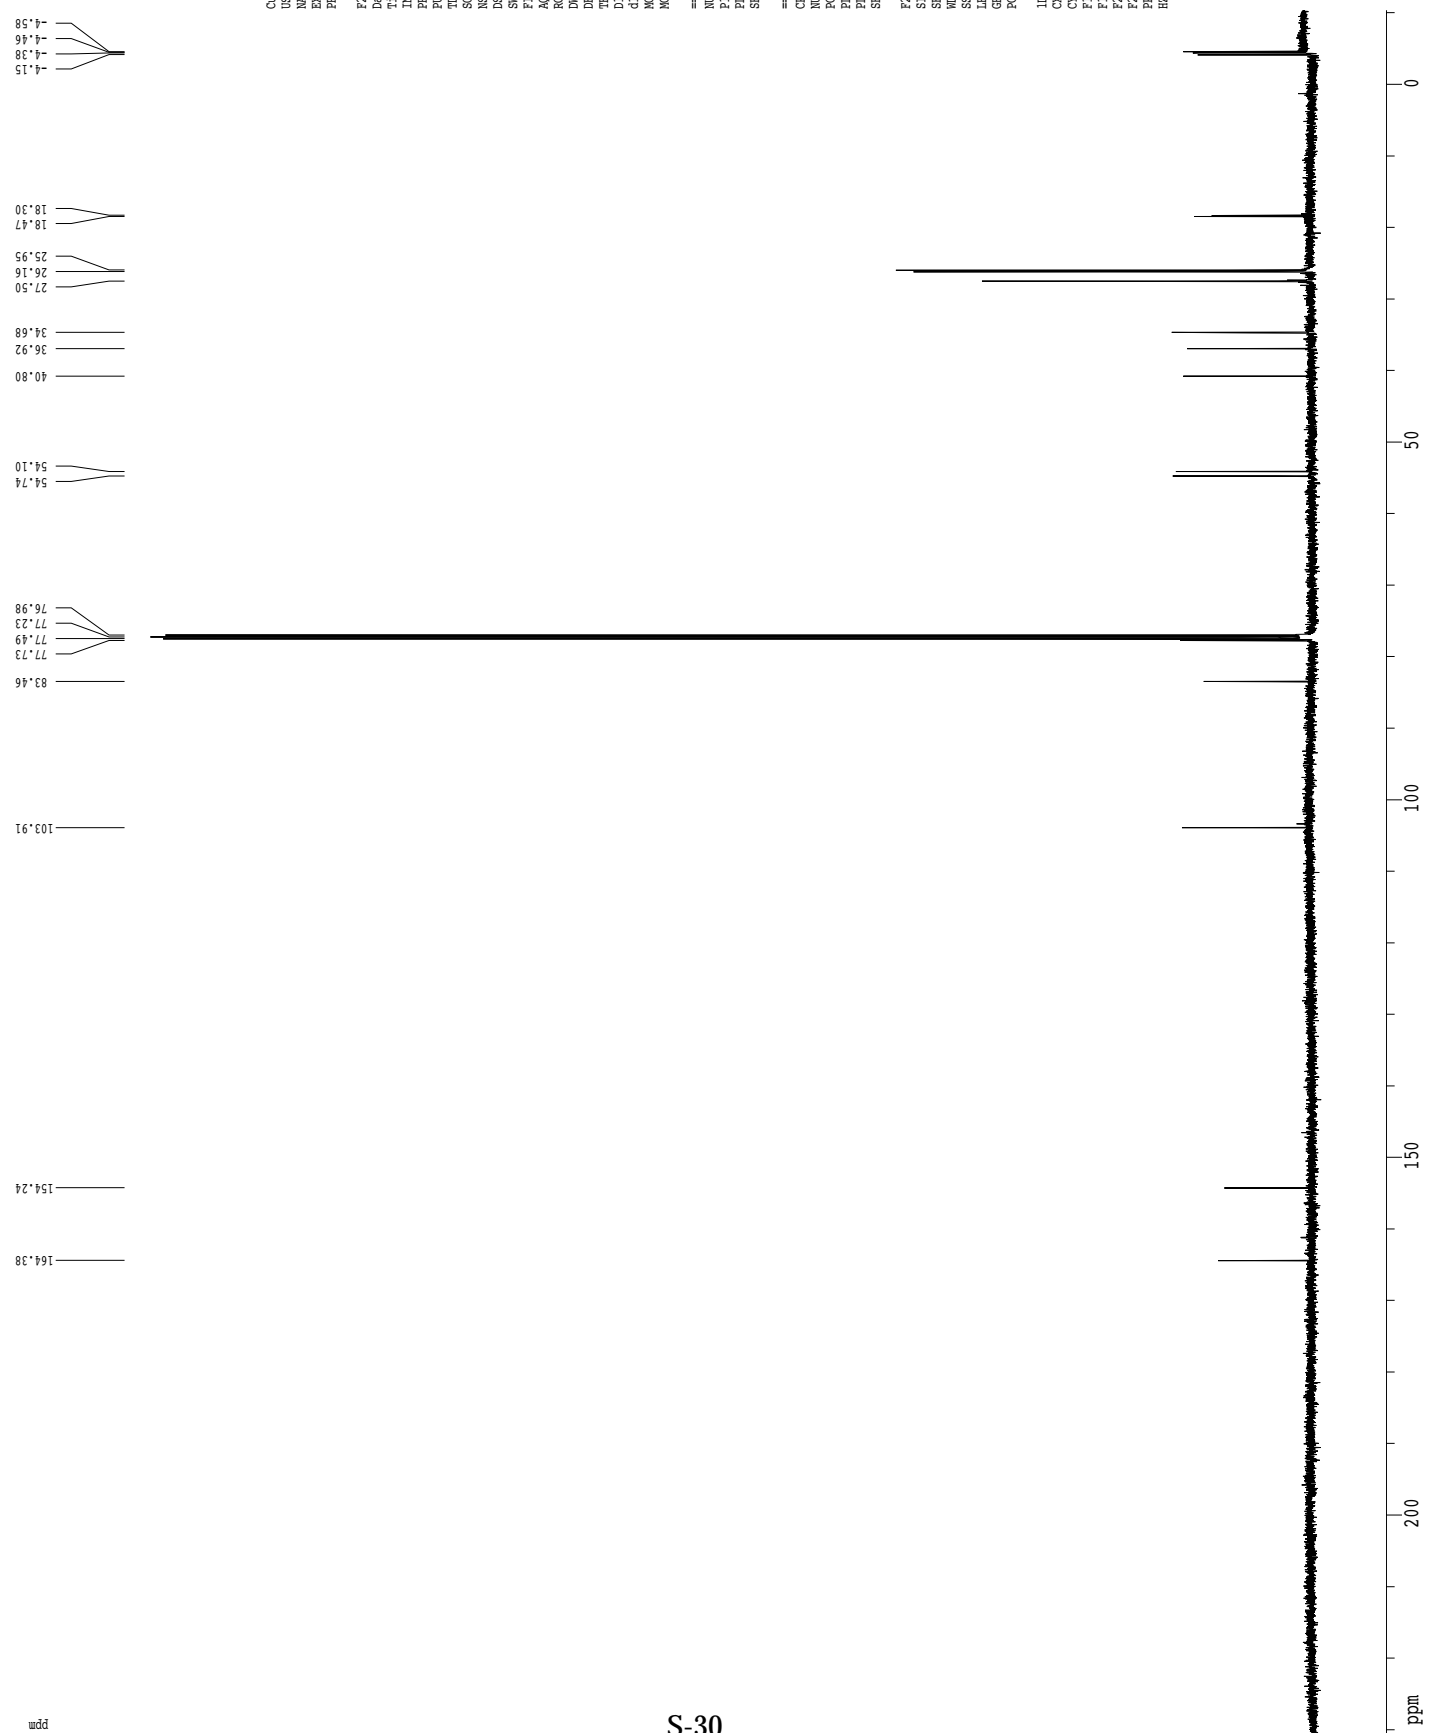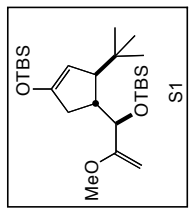

Current Data Parameters  
 USER chrisab  
 NAME cmb3122-2d  
 EXPNO 13  
 PROCNO 1

F2 - Acquisition Parameters  
 Date\_ 20100516  
 Time 14:11  
 INSTRUM cryo1  
 PROBRD 5 mm CPDCT 1P-  
 PULPROG zgpg30  
 TD 65536  
 SOLVENT CDCl3  
 NS 44  
 DS 0  
 SWH 30303.031 Hz  
 FIDRES 0.462388 Hz  
 AQ 1.0813940 sec  
 RG 13004  
 DW 16.500 usec  
 DE 6.00 usec  
 TE 298.0 K  
 D1 4.0000000 sec  
 d11 0.0300000 sec  
 ACRESF 0.0000000 sec  
 ACRESK 0.0150000 sec

==== CHANNEL f1 =====  
 NUC1 <sup>13</sup>C  
 P1 14.75 usec  
 PL1 -1.00 dB  
 SFO1 125.7942548 MHz

==== CHANNEL f2 =====  
 CPDPRG2 waltz16  
 NUC2 <sup>1</sup>H  
 PCPD2 100.00 usec  
 PL2 1.60 dB  
 PL12 24.80 dB  
 SFO2 500.2225011 MHz

F2 - Processing parameters  
 SI 65536  
 SF 125.7803974 MHz  
 GAMMA 1H  
 SSB 0  
 LB 1.00 Hz  
 GB 0  
 PC 2.00

ID NMR plot parameters  
 CX 22.80 cm  
 CY 15.65 cm  
 F1P 230.460 ppm  
 F1 28987.36 Hz  
 F2P -10.460 ppm  
 F2 -1315.66 Hz  
 PPMCH 10.56667 ppm/cm  
 HZCH 1329.08008 Hz/cm

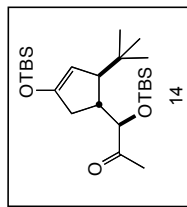

Current Data Parameters  
 USER chrisb  
 NAME cmb3150s  
 EXPNO 1  
 PROCNO 1

F2 - Acquisition Parameters  
 Date\_ 20080612  
 Time 20:44  
 INSTRUM cryo500  
 PULPROG zgpg30  
 PRGNAME 5 mm CPFG30  
 FIDRES 0.098043 Hz  
 TD 81728  
 SOLVENT CDCl3  
 NS 1  
 DS 0  
 SWH 8012.820 Hz  
 FIDRES 0.098043 Hz  
 AQ 5.0998774 sec  
 RG 3.6  
 DW 62.400 usec  
 DE 6.00 usec  
 TE 298.0 K  
 MCFREQ 0.1000000 sec  
 MCHRG 0.0000000 sec  
 MCHRG 0.01500000 sec

==== CHANNEL f1 =====  
 NUCL1 1H  
 P1 7.38 usec  
 PL1 1.60 dB  
 SFO1 500.2235015 MHz

F2 - Processing parameters  
 SI 65536  
 SE 500.2230410 MHz  
 WDW EM  
 SS 0  
 GB 0  
 PC 0.01

1D NMR plot parameters  
 CX 22.80 cm  
 CY 15.00 cm  
 F1P 8.871 ppm  
 F1 4437.26 Hz  
 F2P -0.836 ppm  
 F2 -418.27 Hz  
 PRCH 0.42574 ppm/cm  
 HZCX 212.96188 Hz/cm

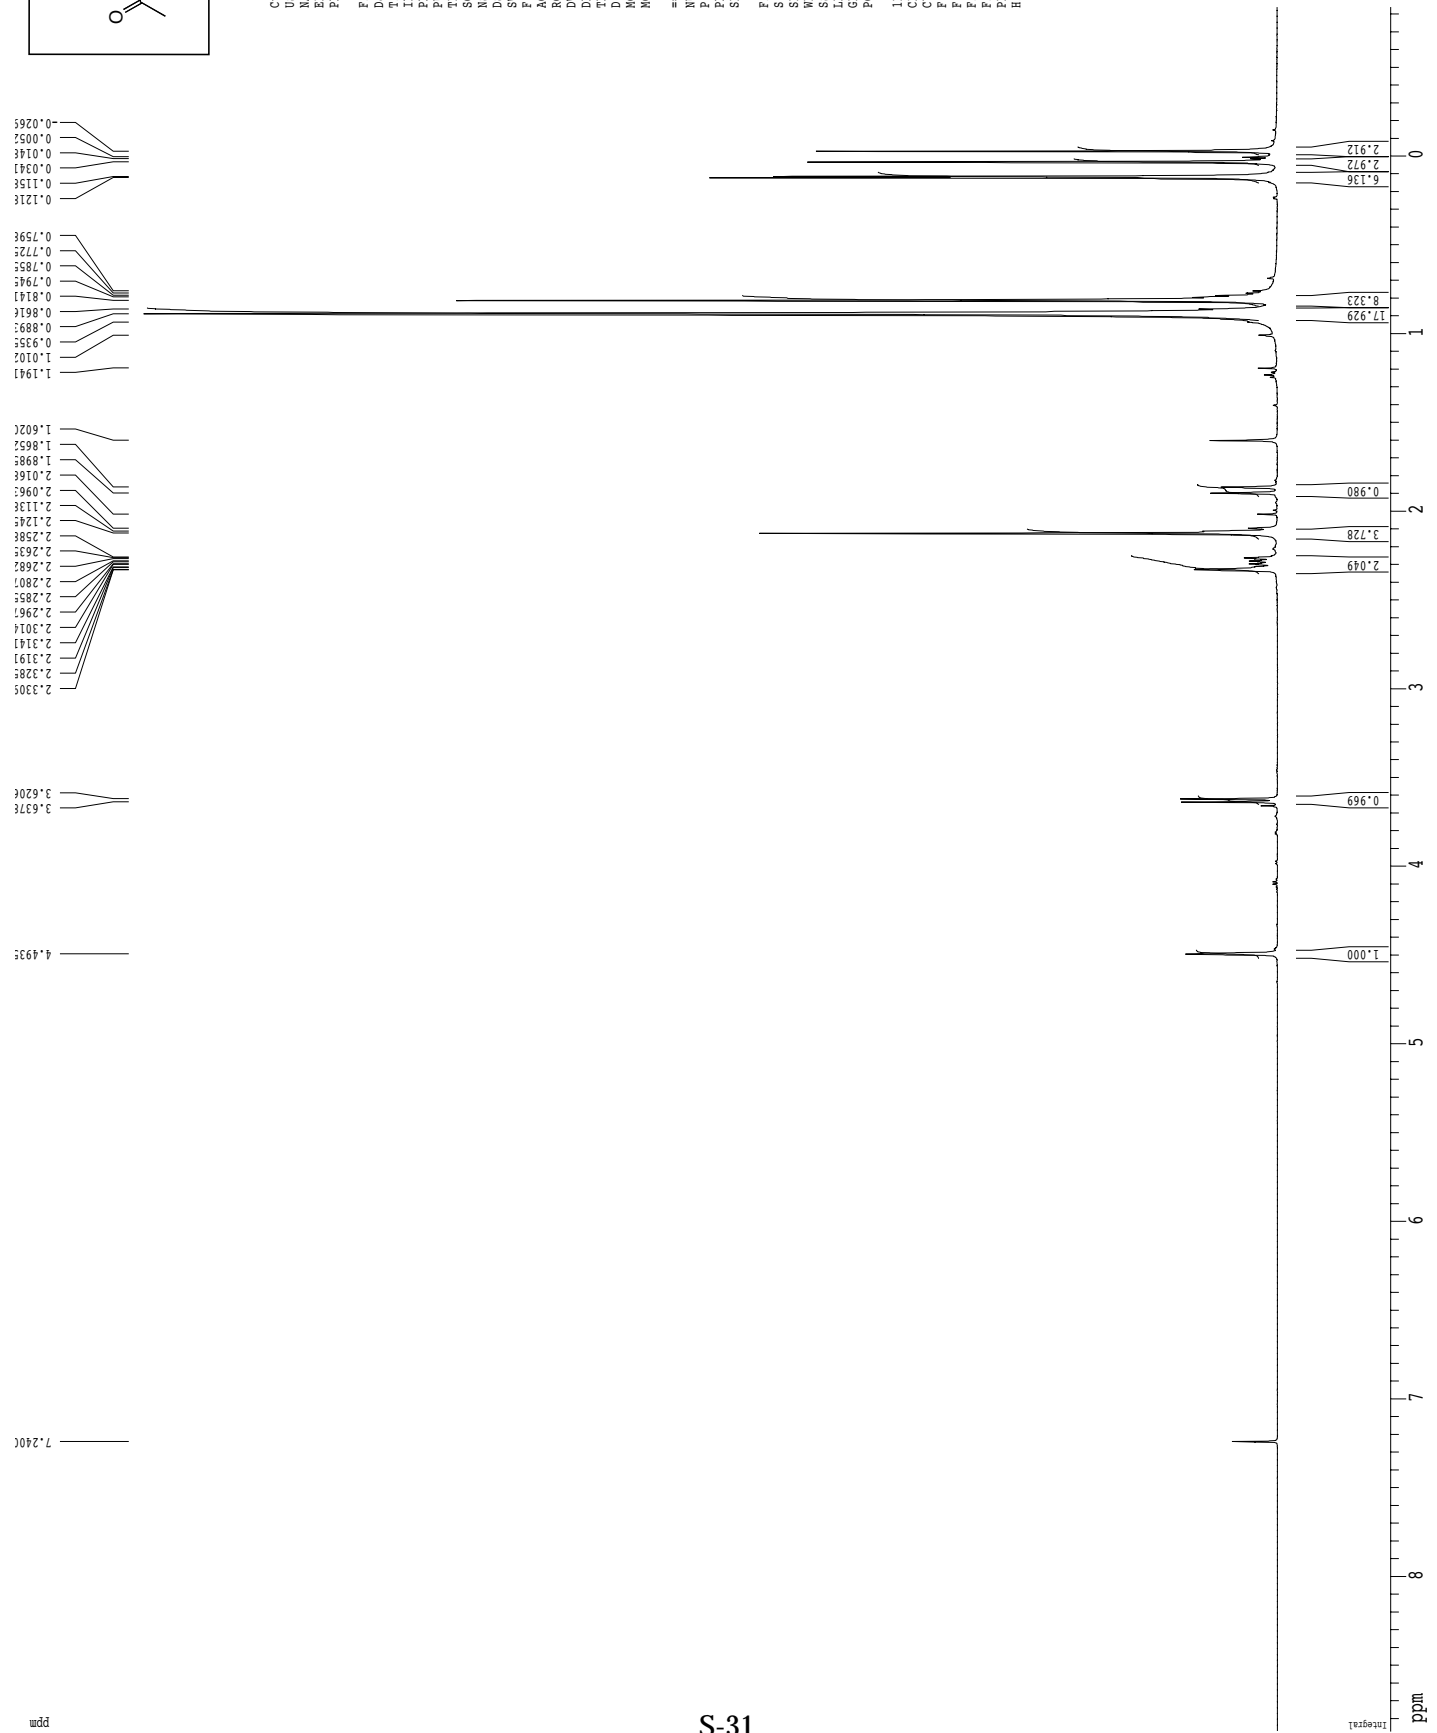

**<sup>13</sup>C spectrum with <sup>1</sup>H decoupling**

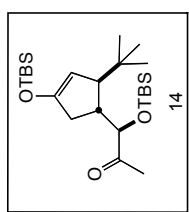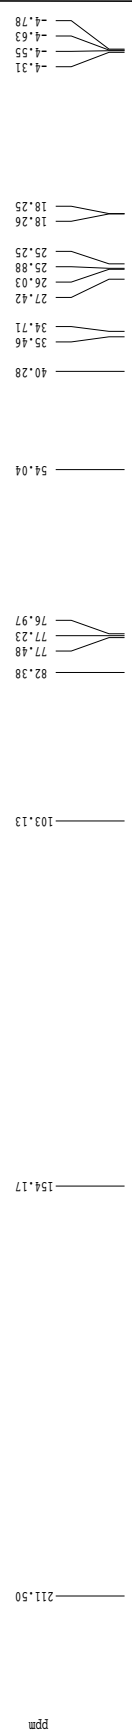

```

Current Data Parameters
USER      chrisab
NAME      cmb3150s
EXPNO     2
PROCNO    1

F2 - Acquisition Parameters
Date_     20100612
Time      20:45
INSTRUM   cryo
PROBHD    5 mm CPDCT 1H-
PULPROG   zgpg30
TD         65536
SOLVENT   CDCl3
NS         8
DS         0
SWH        30303.031 Hz
FIDRES     0.462388 Hz
AQ         1.0813940 sec
RG         13004
DW         16.500 usec
DE         6.00 usec
TE         298.0 K
d1         0.25000000 sec
d11        0.03000000 sec
ACQRESF    0.00000000 sec
ACQRESK    0.01500000 sec

===== CHANNEL f1 =====
NUC1       13C
P1         14.75 usec
PL1        -1.00 dB
SFO1       125.7942548 MHz

===== CHANNEL f2 =====
CPDPRG2    waltz16
NUC2        1H
PCPD2      100.00 usec
PL2         1.60 dB
PL12       24.80 dB
SFO2       500.2225011 MHz

F2 - Processing parameters
SI         65536
SF         125.7803963 MHz
WDW        EM
SSB        0
GB         0
PC         2.00

ID NMR plot parameters
CX         22.80 cm
CY         15.65 cm
F1P        230.637 ppm
F1         29009.67 Hz
F2P        -10.287 ppm
F2         -1293.96 Hz
PPMCON     10.56688 ppm/cm
HZCON      1329.10681 Hz/cm
    
```





**<sup>13</sup>C spectrum with <sup>1</sup>H decoupling**

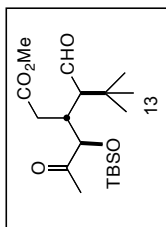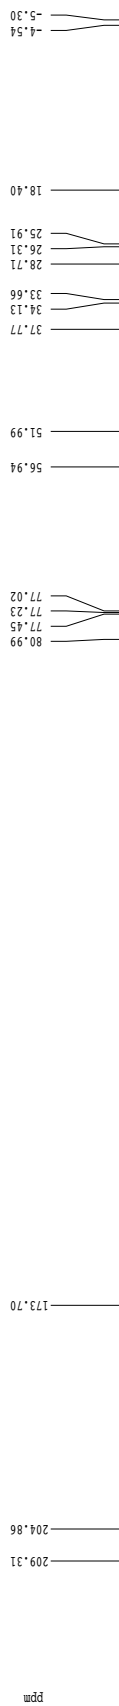

```

Current Data Parameters
USER      chrisab
NAME      cmb2222-cut
EXPNO     113
PROCNO    1

F2 - Acquisition Parameters
Date_     20070917
Time      16.24
INSTRUM   av600
PROBHD    5 mm TBI 1H/13
PULPROG   zgpg30
TD        65400
AQ         0.9400
RG         512
DS         0
SWH        36231.883 Hz
FIDRES     0.554004 Hz
AQ         0.9025700 sec
RG         512
DW         13.800 usec
DE         6.00 usec
TE         298.0 K
D1         5.0000000 sec
d11        0.0300000 sec
TD0        1

===== CHANNEL f1 =====
NUC1       13C
P1         15.00 usec
PL1        0.00 dB
SFO1       150.9194080 MHz

===== CHANNEL f2 =====
CPDPRG2   waltz16
NUC2       1H
PCPD2      80.00 usec
PL2        120.00 dB
PL12       18.80 dB
SFO2       600.1330010 MHz

F2 - Processing parameters
SI         65536
SF         150.9194080 MHz
WDW        EM
SSB        0
LB         0.50 Hz
GB         0
PC         1.00

ID_NMR parameters
CX         22.80 cm
CY         15.65 cm
FLP        209.520 ppm
F1         34635.16 Hz
F2P        -10.507 ppm
F2         -1.985.47 Hz
PPMCMH    10.52747 ppm/cm
HZCM      1888.62439 Hz/cm
    
```

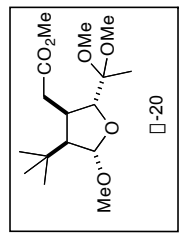

Current Data Parameters  
 USER: schner  
 NAME: ms02-31-3-2ben  
 EXPNO: 1  
 PROCNO: 1

F2 - Acquisition Parameters  
 Date\_: 20090630  
 Time: 12.42  
 INSTRUM: cryo500  
 PROBHD: 5 mm CPCLP1H-1  
 PULPROG: zgpg30  
 TD: 65536  
 SOLVENT: CDCl<sub>3</sub>  
 NS: 6  
 DS: 2  
 SWH: 8012.820 Hz  
 FIDRES: 0.098043 Hz  
 AQ: 5.0998774 sec  
 RG: 5  
 DW: 62.400 usec  
 DE: 6.00 usec  
 TE: 298.0 K  
 D1: 0.10000000 sec  
 ACRESF: 0.00000000 sec  
 ACWRK: 0.01000000 sec

==== CHANNEL f1 =====  
 NUC1: <sup>1</sup>H  
 P1: 7.50 usec  
 PL1: 1.60 dB  
 SFO1: 500.2235015 MHz

F2 - Processing parameters  
 SI: 65536  
 SF: 500.2199998 MHz  
 WDW: EM  
 SSB: 0  
 B: 0.70 Hz  
 GB: 0  
 PC: 4.00

1D NMR plot parameters  
 CX: 22.80 cm  
 CY: 15.00 cm  
 FIP: 7.502 ppm  
 F1: 3752.88 Hz  
 F2P: -0.850 ppm  
 F2: -424.94 Hz  
 PPMCH: 0.36632 ppm/cm  
 HZCM: 183.23811 Hz/cm

<sup>1</sup>H spectrum

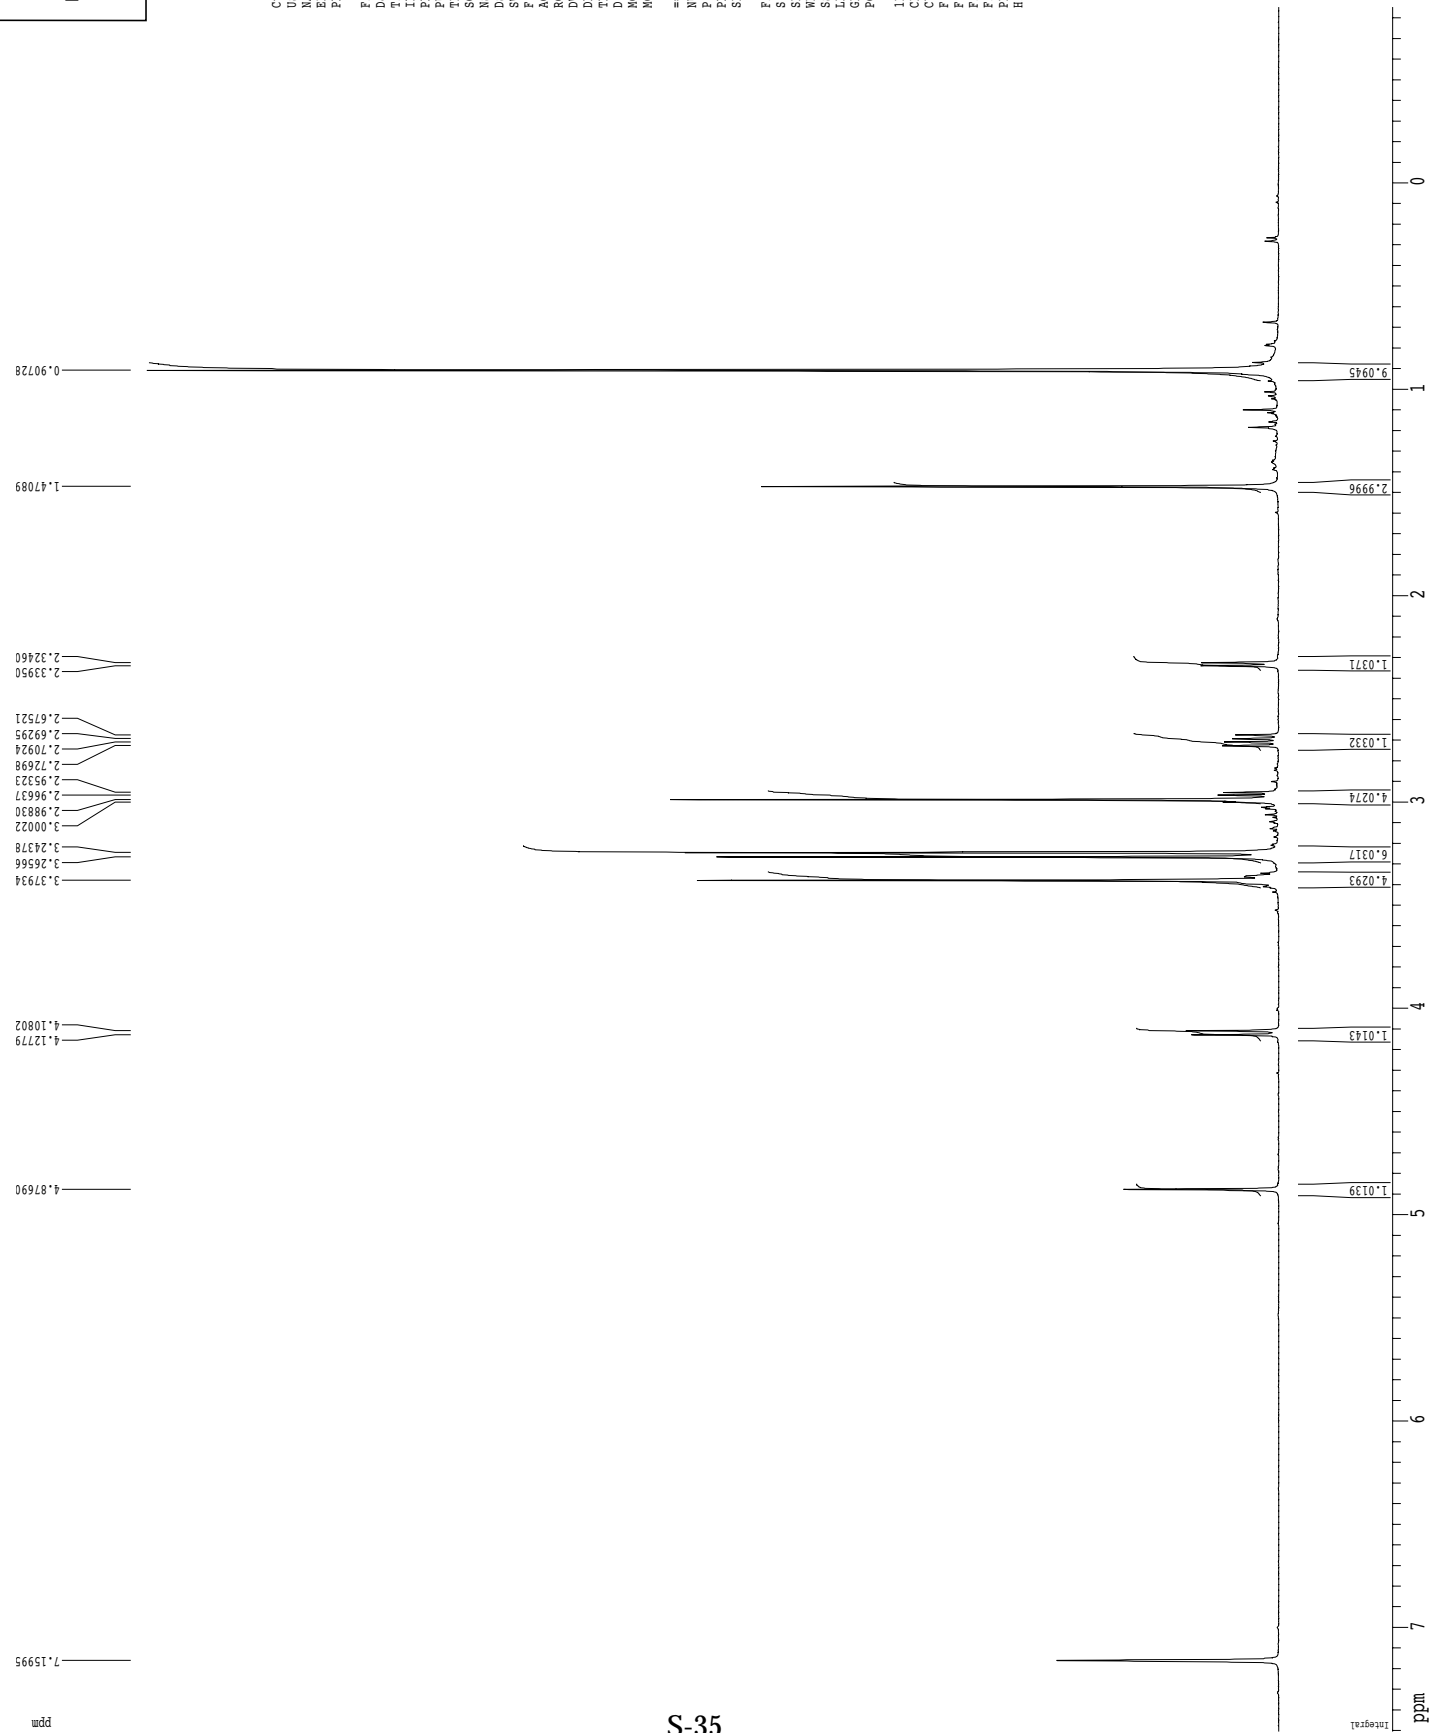

Z-restored spin-echo <sup>13</sup>C spectrum with <sup>1</sup>H decoupling

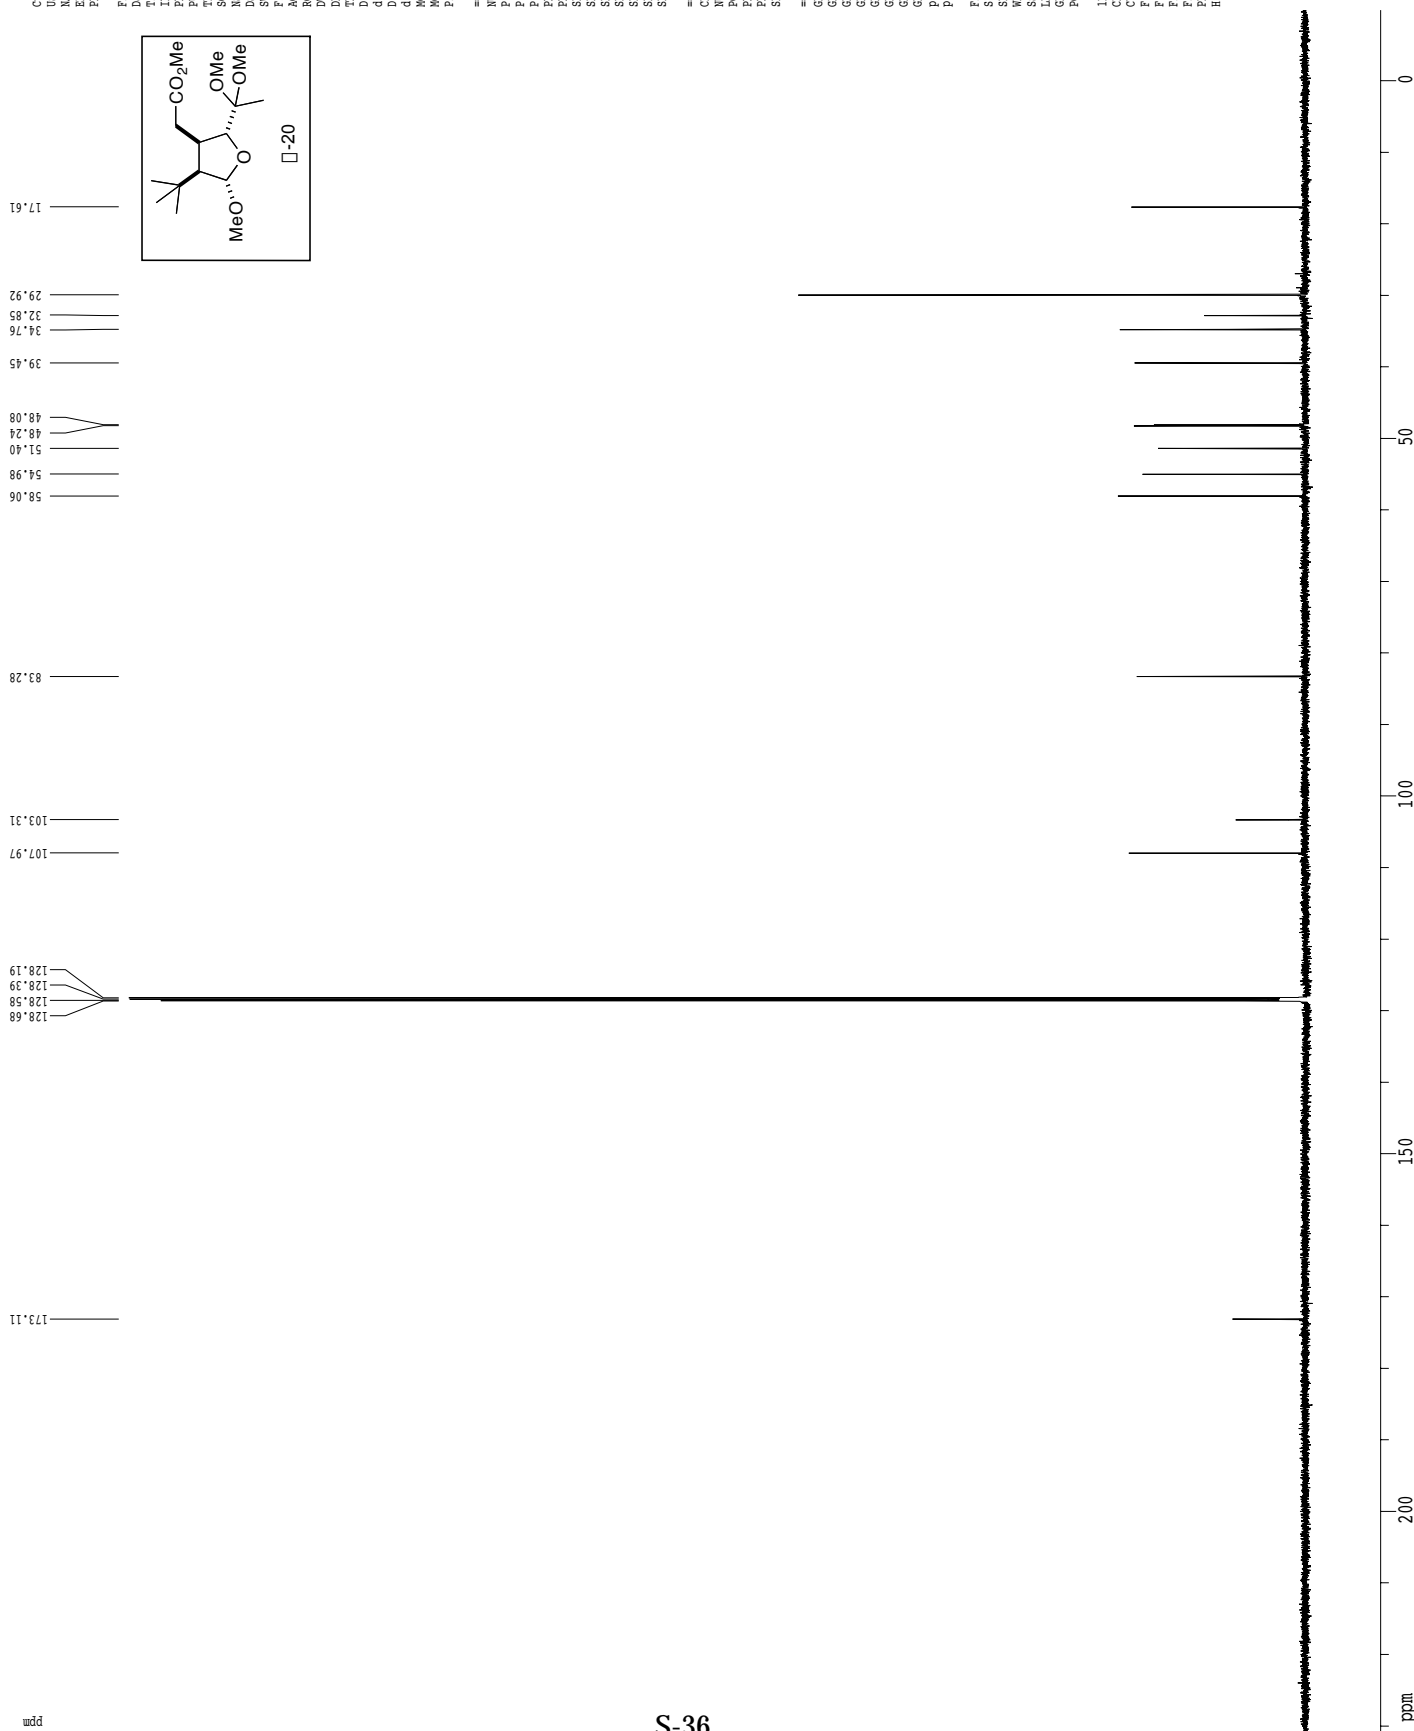

Current Data Parameters  
 USER schuer  
 NAME ms02-31-3-2ben  
 EXPNO 2  
 PROCNO 1

F2 - Acquisition Parameters  
 Date\_ 20090630  
 Time 12.43  
 INSTRUM cryo500  
 PROBHID 5 mm CPYCI IH-  
 PULPROG spinEchoeg30pp-prd  
 TD 6536  
 SOLVENT CCl3  
 NS 2  
 DS 2  
 SWH 30303.033 Hz  
 FIDRES 0.462388 Hz  
 AQ 1.0813940 sec  
 RG 3649.1  
 DN 16.500 usec  
 DE 6.00 usec  
 TE 298.2 K  
 F1 100.626150 MHz  
 d11 0.4380000 sec  
 d16 0.0002000 sec  
 d17 0.00019600 sec  
 MCREST 0.0000000 sec  
 MCNRR 0.0150000 sec  
 P2 29.70 usec

===== CHANNEL f1 =====  
 NUCL1 13C  
 P1 14.85 usec  
 P11 500.00 usec  
 P12 2000.00 usec  
 PL0 120.00 dB  
 PL1 -1.00 dB  
 SF01 125.7942548 MHz  
 SF2 50.00 dB  
 SF3 50.00 dB  
 SP0A1 Cp60.0.5.20.4  
 SP0A2 Cp600000.4  
 SP0FF1 0.00 Hz  
 SP0FF2 0.00 Hz

===== CHANNEL f2 =====  
 CPDPRG2 waltz16  
 NUCL2 1H  
 P2P02 100.00 usec  
 PL2 0.00 dB  
 PL3 2.40 dB  
 SF02 500.2225011 MHz

===== GRADIENT CHANNEL =====  
 GPM01 SINE.100  
 GPM02 SINE.100  
 GEX1 0.00 %  
 GEX2 0.00 %  
 GEX3 0.00 %  
 GEX4 0.00 %  
 GEX5 0.00 %  
 GEX6 0.00 %  
 GEX7 0.00 %  
 GEX8 0.00 %  
 GEX9 0.00 %  
 GEX10 0.00 %  
 GEX11 30.00 %  
 GEX12 50.00 %  
 p15 500.00 usec  
 p16 1000.00 usec

F2 - Processing parameters  
 SI 6536  
 SF 125.780528 MHz  
 NS 2  
 DS 2  
 SW 30303.033 Hz  
 FWHM 230.633 ppm  
 F1 29009.666 Hz  
 F2P -10.287 ppm  
 F2 -1293.96 Hz  
 PPM0M 10.56688 ppm/cm  
 HZCM 1329.10620 Hz/cm

ID NMR plot parameters  
 CX 22.80 cm  
 CY 22.80 cm  
 FIP 230.633 ppm  
 F1 29009.666 Hz  
 F2P -10.287 ppm  
 F2 -1293.96 Hz  
 PPM0M 10.56688 ppm/cm  
 HZCM 1329.10620 Hz/cm

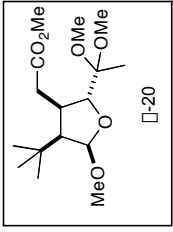

Current Data Parameters  
 USER: schner  
 NAME: ms02-31-3-1ben  
 EXPNO: 1  
 PROCNO: 1

F2 - Acquisition Parameters  
 Date\_: 20090629  
 Time: 14.19  
 INSTRUM: cryo300  
 PULPROG: zgpg30  
 PRGNAME: 5 mm CPYPR1  
 FIDRES: 0.098043 Hz  
 AQ: 5.0998774 sec  
 RG: 5.7  
 DW: 62.400 usec  
 DE: 6.00 usec  
 TE: 298.0 K  
 MCHRESF: 0.1000000 sec  
 MCHRG: 0.0000000 sec  
 MCHRK: 0.01500000 sec

==== CHANNEL f1 =====  
 NUCL: 1H  
 P1: 7.50 usec  
 PL1: 1.60 dB  
 SFO1: 500.2235015 MHz

F2 - Processing parameters  
 SI: 65536  
 SF: 500.2199998 MHz  
 WDW: EM  
 SSB: 0  
 LB: 0.30 Hz  
 GB: 0  
 PC: 4.00

1D NMR plot parameters  
 CX: 22.80 cm  
 CY: 15.00 cm  
 F1P: 7.805 ppm  
 F1: 3904.37 Hz  
 F2P: -0.945 ppm  
 F2: -4772.78 Hz  
 PRCH: 0.38379 ppm/cm  
 HZCX: 191.98038 Hz/cm

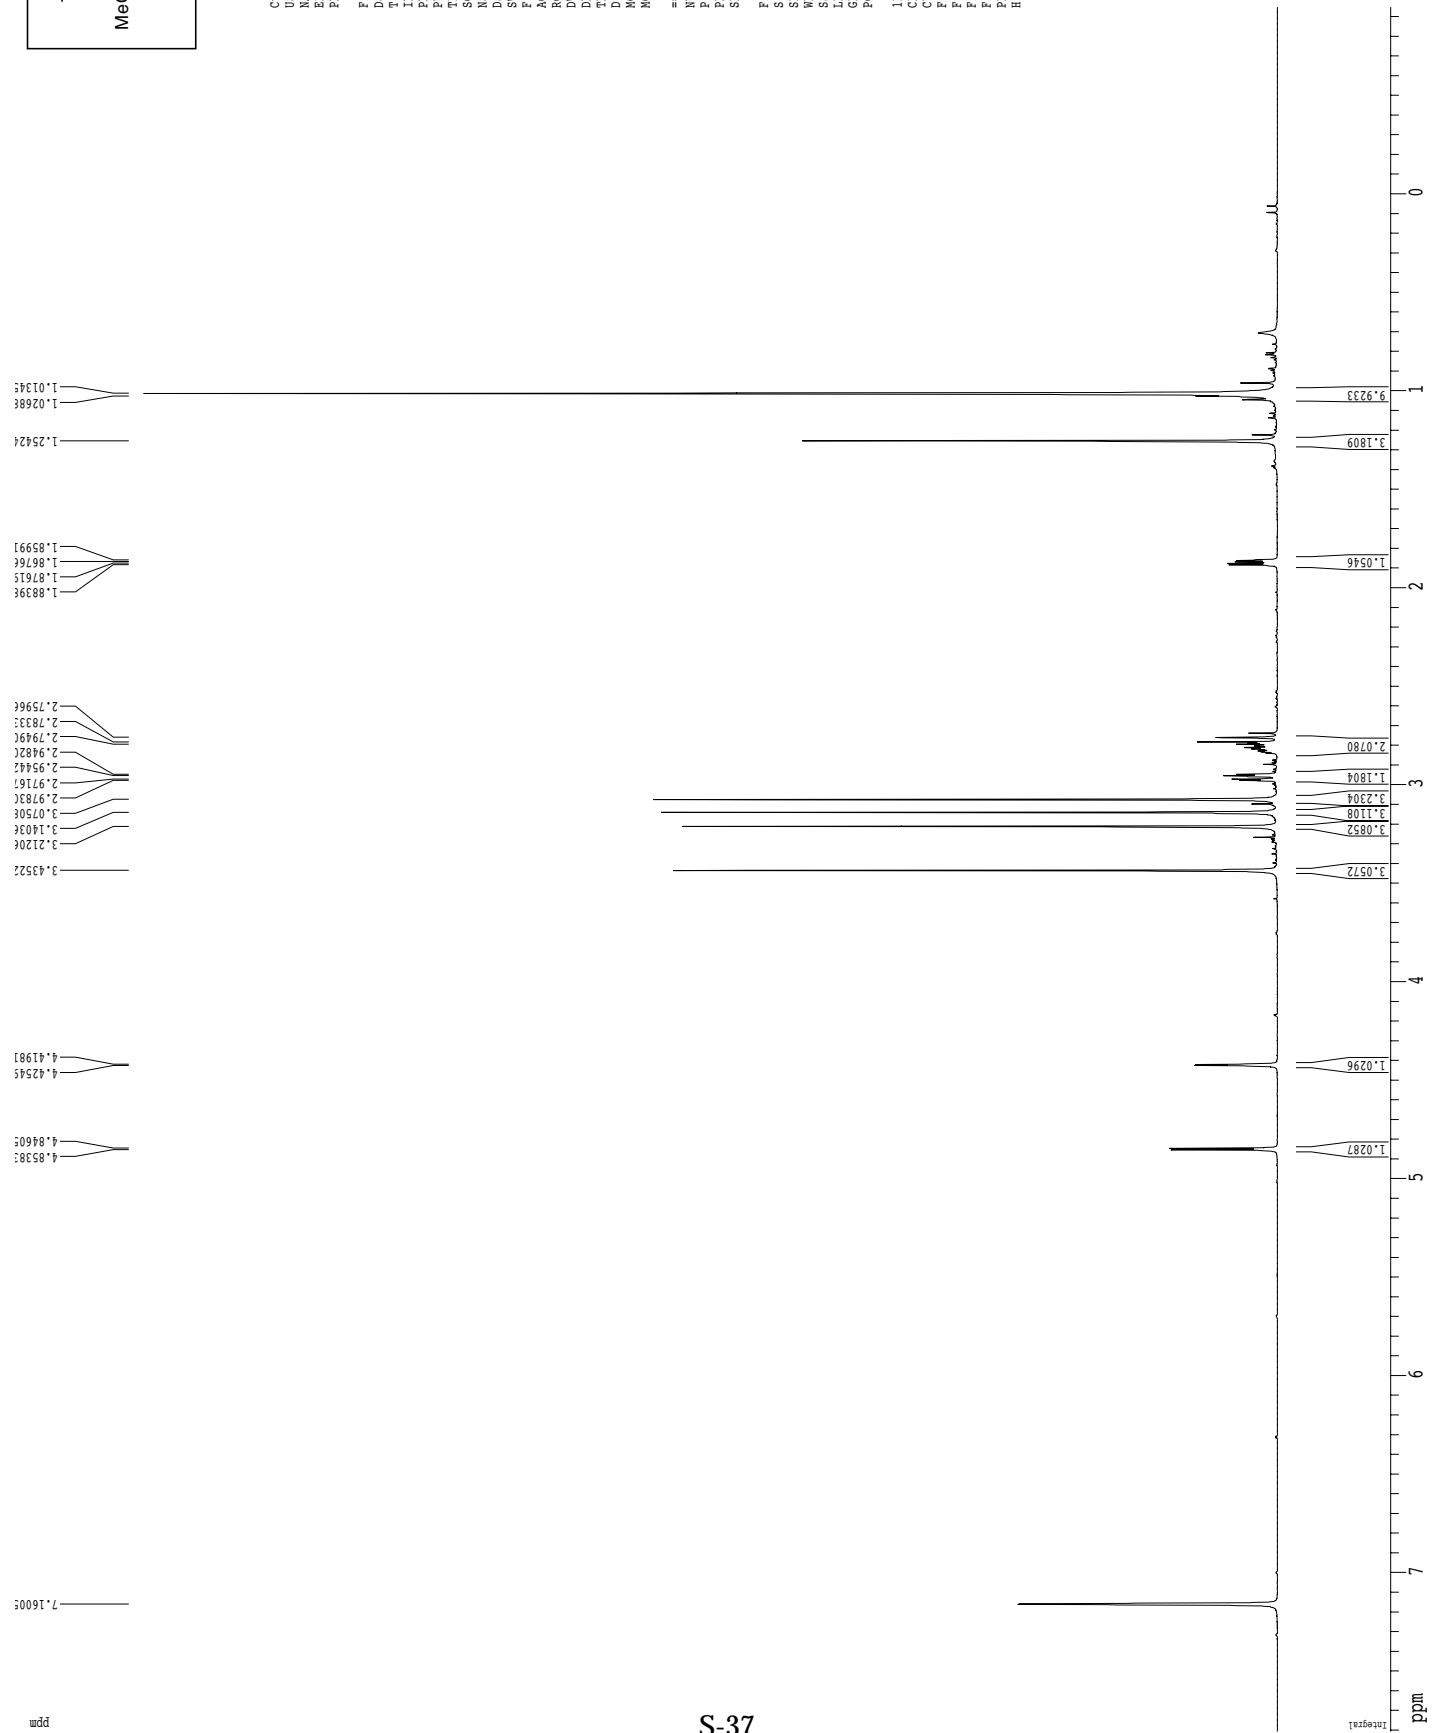

Z-restored spin-echo <sup>13</sup>C spectrum with <sup>1</sup>H decoupling

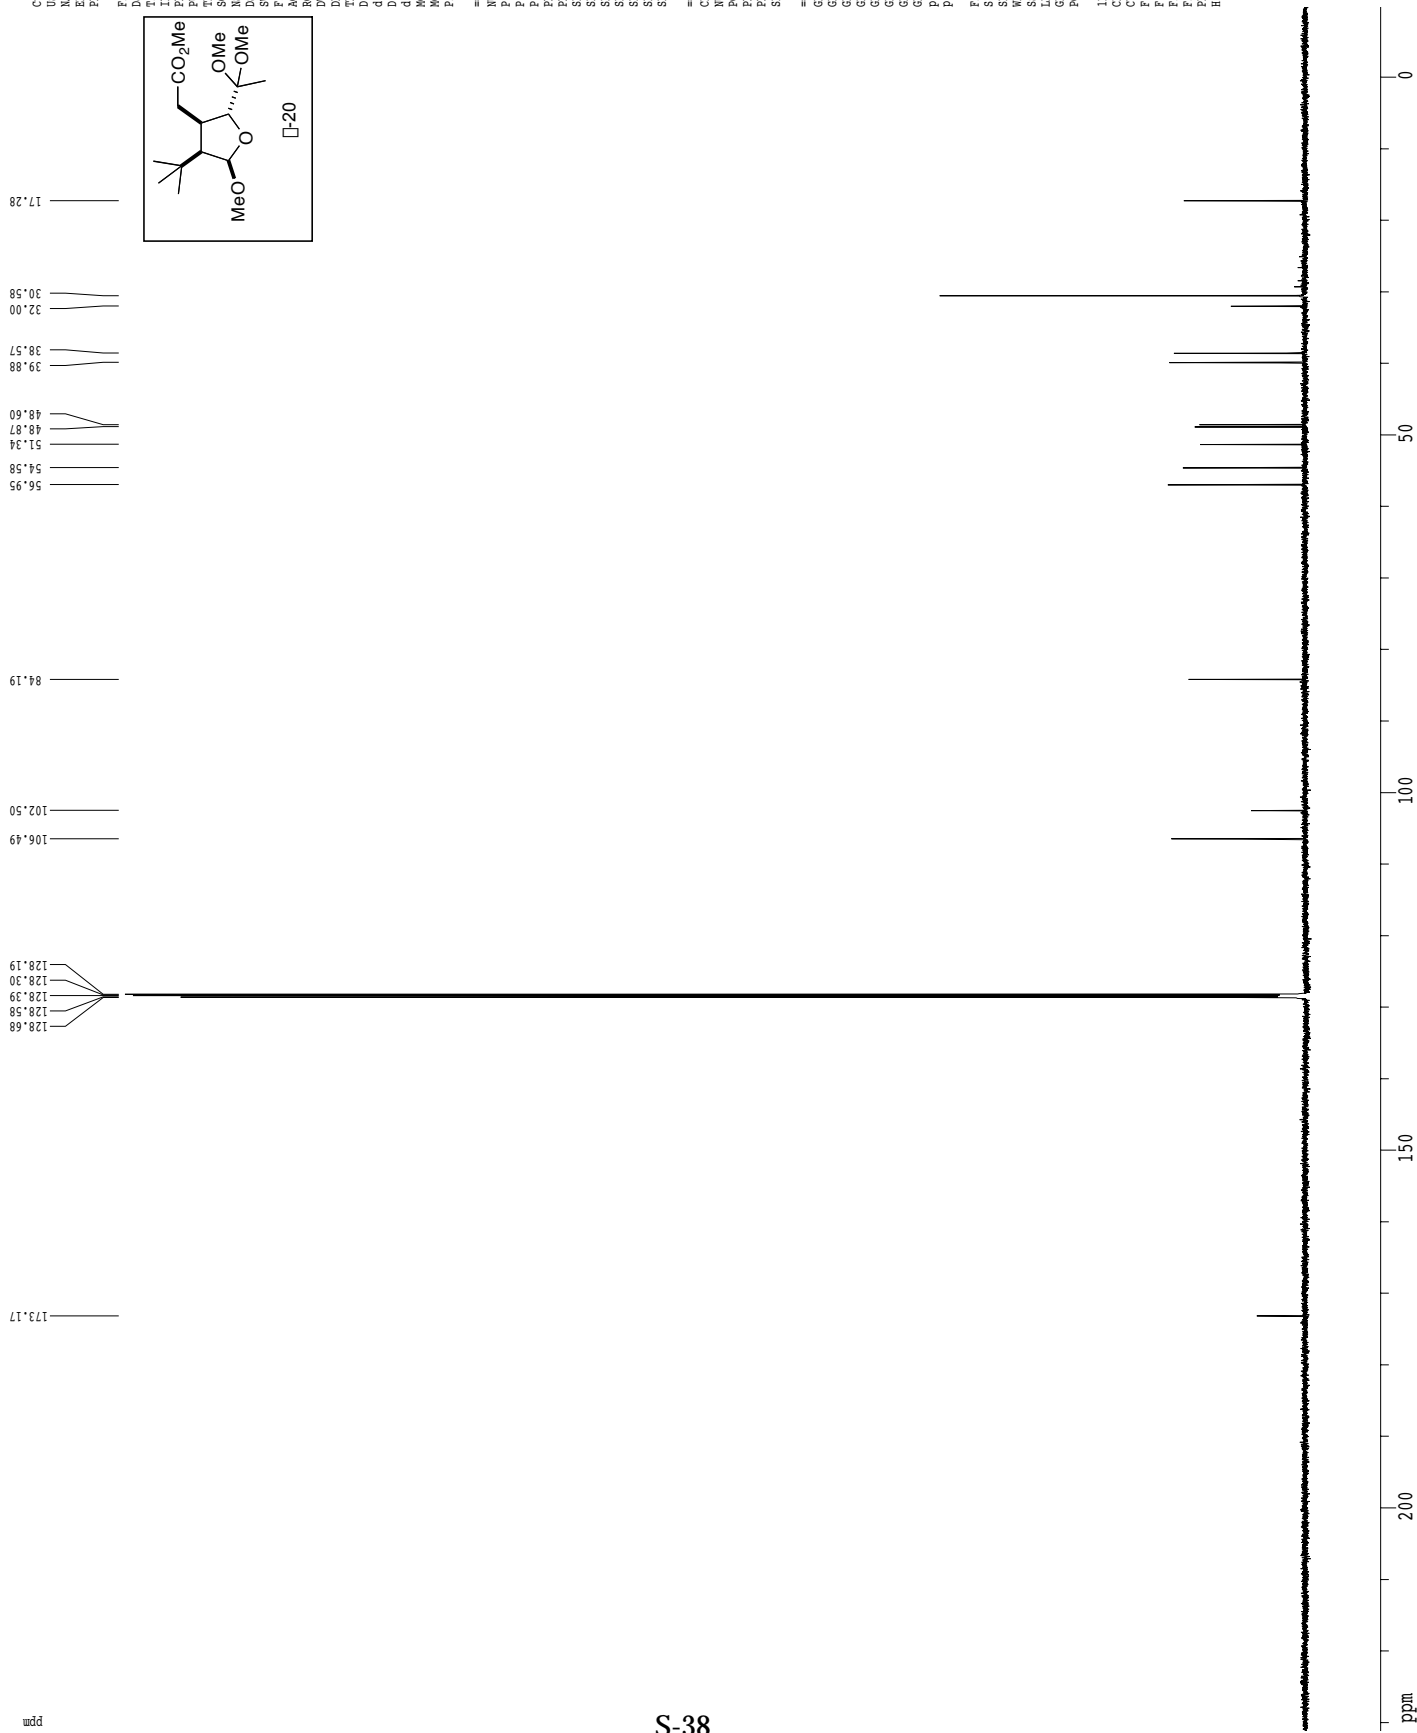

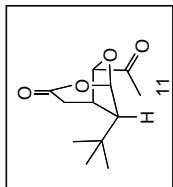

Current Data Parameters  
 USER chrisab  
 NAME cmb2190-top  
 EXPNO 11  
 PROCNO 1

F2 - Acquisition Parameters  
 Date\_ 20070809  
 Time 16.24  
 INSTRUM av600  
 PROBD 5 mm TBI 1H/13  
 PULPROG zg30  
 TD 65536  
 SOLVENT CDCl3  
 NS 2  
 DS 2  
 SWH 9615.385 Hz  
 FIDRES 0.098178 Hz  
 AQ 5.0928259 sec  
 RG 812  
 DW 52.000 usec  
 DE 6.00 usec  
 TE 298.0 K  
 D1 0.1000000 sec  
 TD0 1

==== CHANNEL f1 =====  
 NUC1 1H  
 P1 8.00 usec  
 PL1 -1.00 dB  
 SFO1 600.132009 MHz

F2 - Processing Parameters  
 SF 600.1300468 MHz  
 WDW EM  
 SSB 0  
 LB 0.30 Hz  
 GB 0  
 PC 1.00

ID NMR plot parameters  
 CX 22.80 cm  
 CY 15.00 cm  
 F1P 9.000 ppm  
 F1 5401.17 Hz  
 F2P -1.089 ppm  
 F2 -653.63 Hz  
 PPMXCH 0.44251 ppm/cm  
 HZXCX 265.56149 Hz/cm

1H spectrum

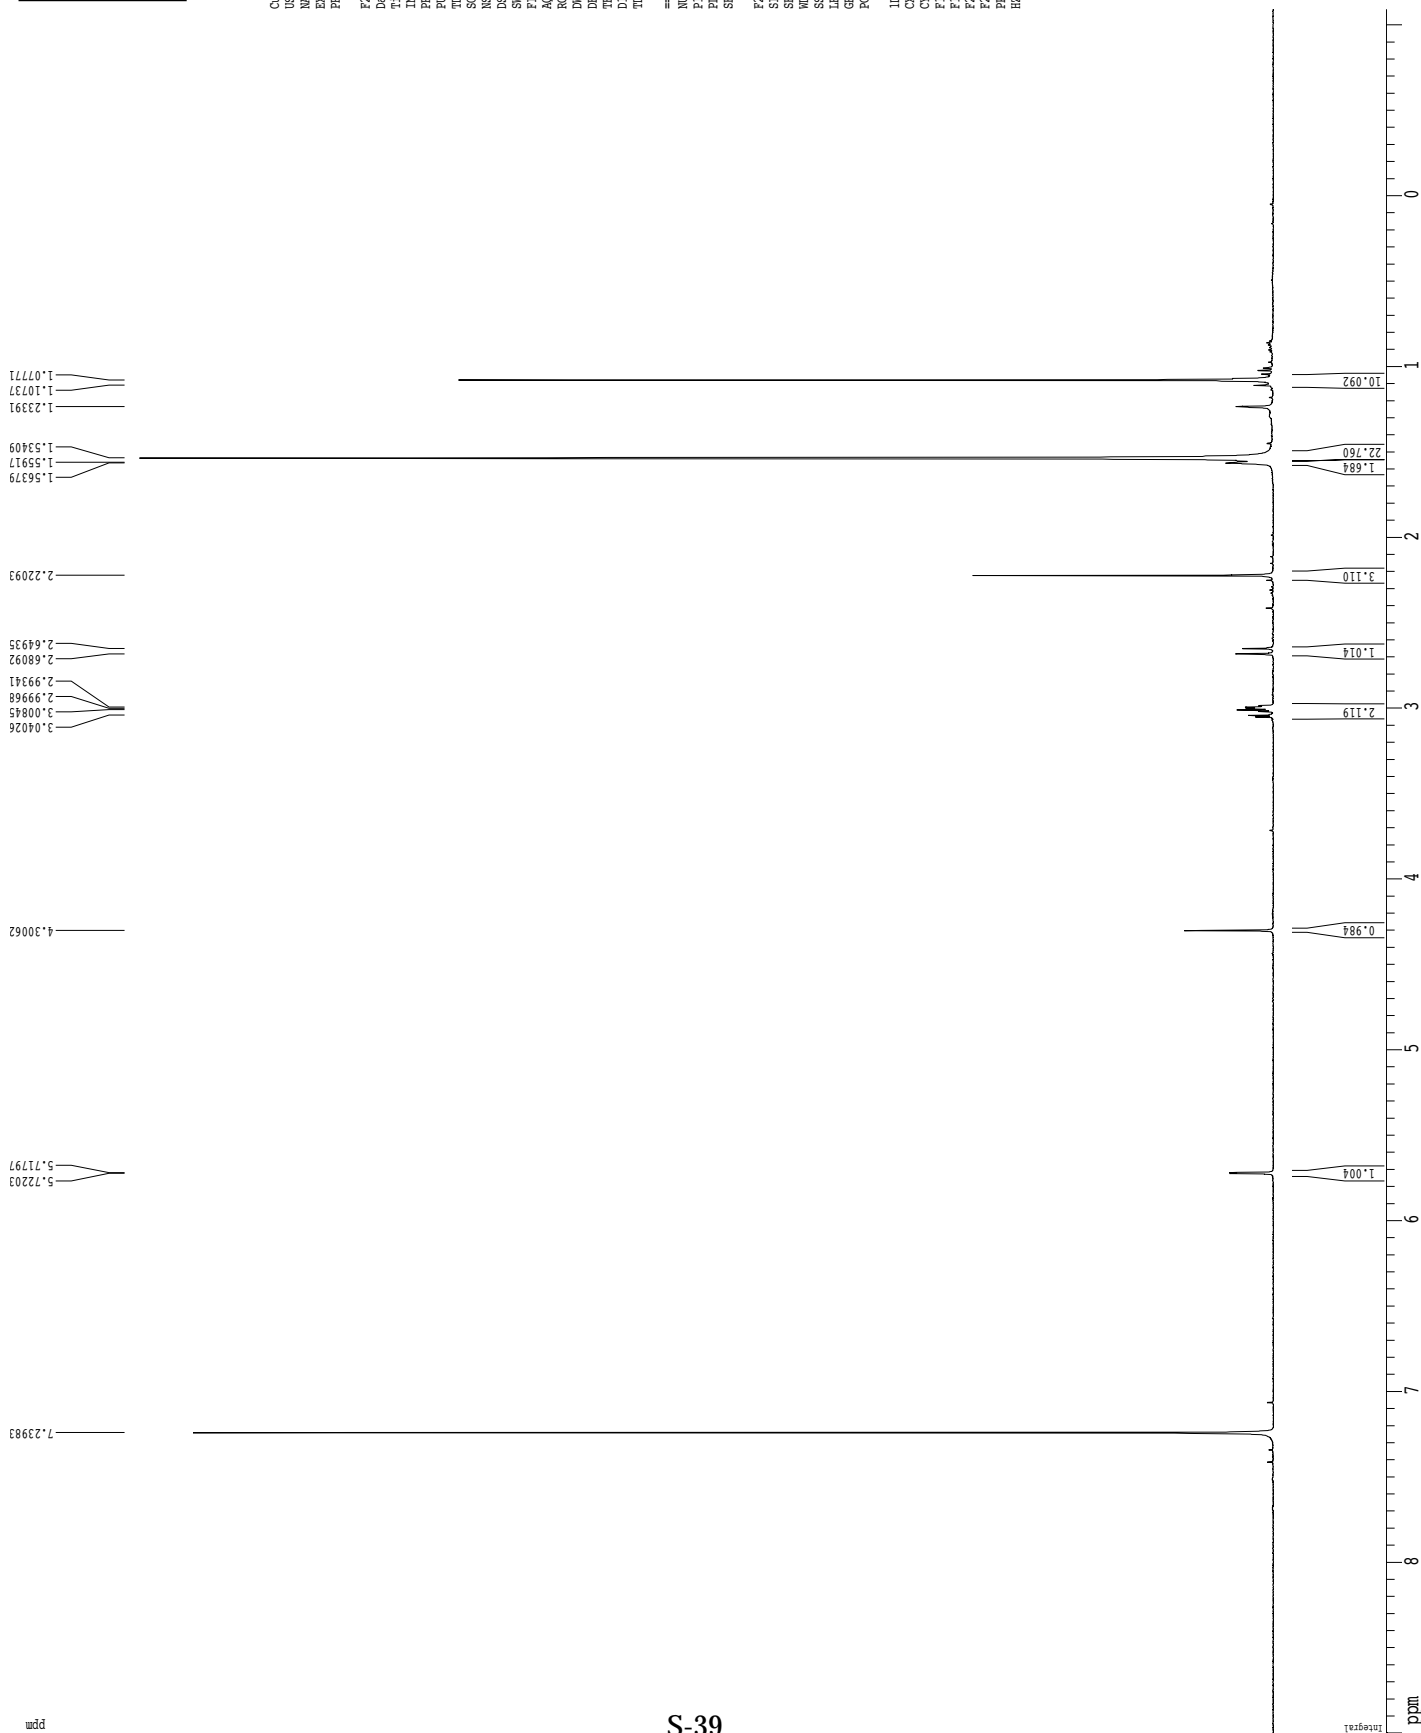

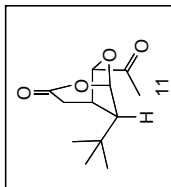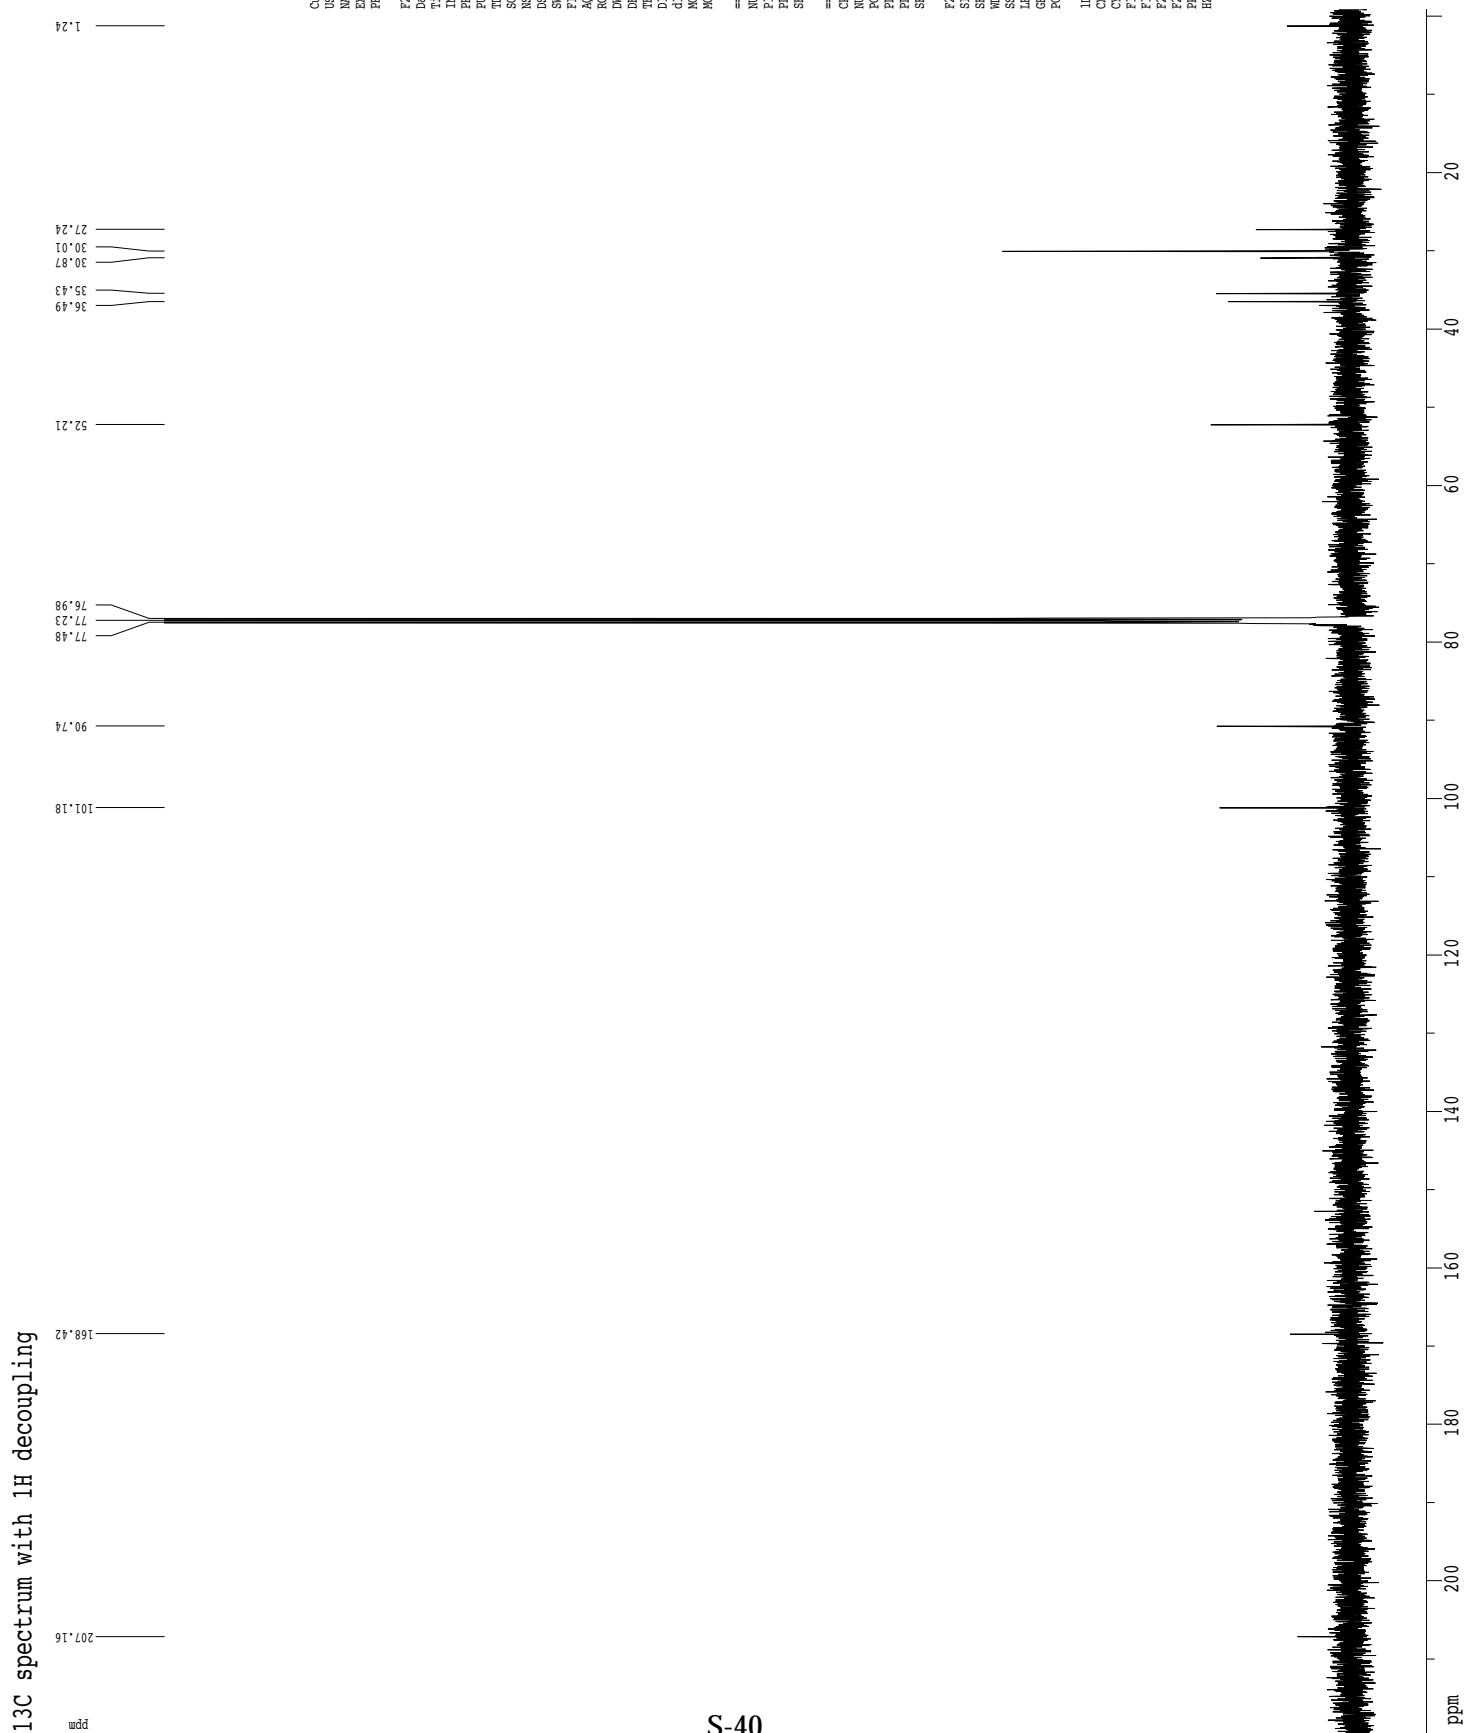

```

Current Data Parameters
USER      chrisab
NAME      cmb2190-top
EXPNO     15
PROCNO    1

F2 - Acquisition Parameters
Date_     20070810
Time      10.46
INSTRUM   cryo00
PROBHD    5 mm CPCL H-
PULPROG   zgpg30
AQ         0.6413
RG         7.31
DS         4
SWH        30303.031 Hz
FIDRES     0.463222 Hz
AQ         1.0794470 sec
RG         91.9572
DW         16.500 usec
DE         6.00 usec
TE         298.0 K
d11        2.0000000 sec
d12        0.0300000 sec
d13        0.0000000 sec
d14        0.0000000 sec
d15        0.0150000 sec
===== CHANNEL f1 =====
NUC1       13C
P1         15.00 usec
PL1        0.00 dB
SFO1       125.7942548 MHz
===== CHANNEL f2 =====
CPDPRG2   waltz16
NUC2       1H
PCPD2     100.00 usec
PL2        1.60 dB
PL12       23.54 dB
SFO2       500.2225011 MHz

F2 - Processing parameters
SI         65536
SF         125.7803988 MHz
WDW        EM
SSB        0
LB         1.00 Hz
GB         0
PC         1.20

ID NMR plot parameters
CY         22.80 cm
CX         100.00 cm
E1P        219.444 ppm
E1         27601.79 Hz
E2P        -0.861 ppm
E2         -108.30 Hz
PFMCM      9.66251 ppm/cm
HZCM       1215.35486 Hz/cm
    
```



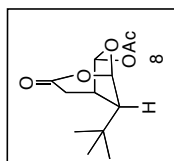

Current Data Parameters  
 USER: schner  
 NAME: chrisaplyylene c13  
 EXPNO: 1  
 PROCNO: 1  
 F2 - Acquisition Parameters  
 Date\_: 20090922  
 Time: 16.05  
 INSTRUM: cryso00  
 PULPROG: 5 mm CPTCL1D  
 PROCNO: 1  
 TD: 65536  
 SFO: 500.1362600 MHz  
 SOLVENT: CDCl3  
 NS: 9  
 DS: 2  
 SWH: 8012.820 Hz  
 FIDRES: 0.097174 Hz  
 AQ: 5.1098774 sec  
 RG: 5  
 DF: 62.400 usec  
 DE: 6.00 usec  
 TE: 298.0 K  
 UZ: 0.100000 sec  
 UZ2: 0.100000 sec  
 UZ3: 0.100000 sec  
 MCORR: 0.4151000 sec  
 ===== CHANNEL f1 =====  
 NUC1: 1H  
 P1: 7.50 usec  
 PL1: 0.00 dB  
 SFO1: 500.1362600 MHz  
 F2 - Processing parameters  
 SI: 65536  
 SF: 500.1362600 MHz  
 WDW: EM  
 SS: 0  
 LB: 0.30 Hz  
 GB: 0  
 PC: 4.00  
 ID NMR plot parameters  
 CX: 7.00 cm  
 CZ: 7.00 cm  
 FIDRES: 0.097174 Hz  
 F1P: 8.000 ppm  
 F1: 4001.76 Hz  
 F2P: -0.500 ppm  
 F2: -250.11 Hz  
 PROCN: 0.37281 ppm/cm  
 RECN: 186.46335 Hz/cm

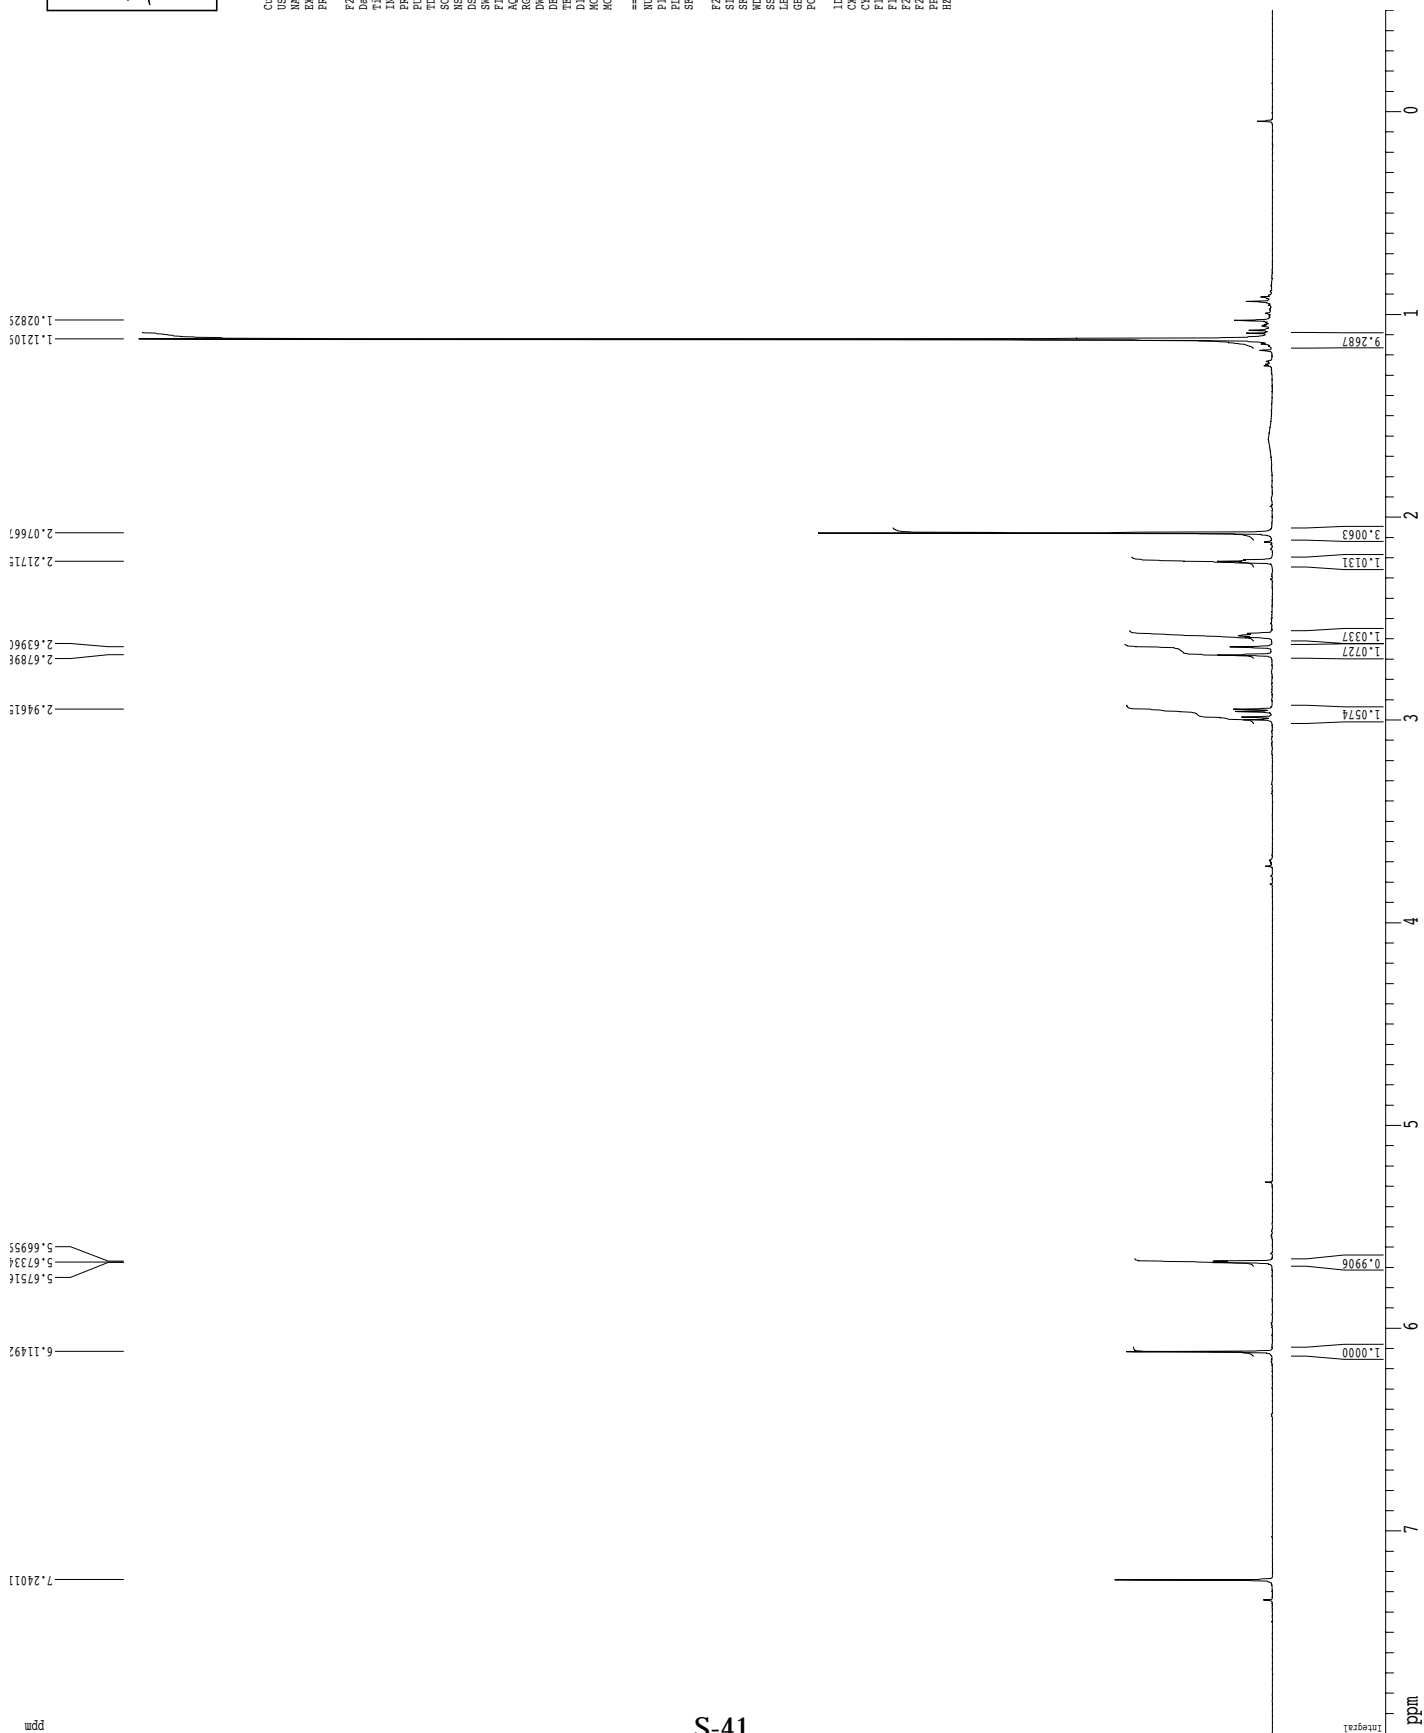

Z-restored spin-echo 13C spectrum with 1H decoupling

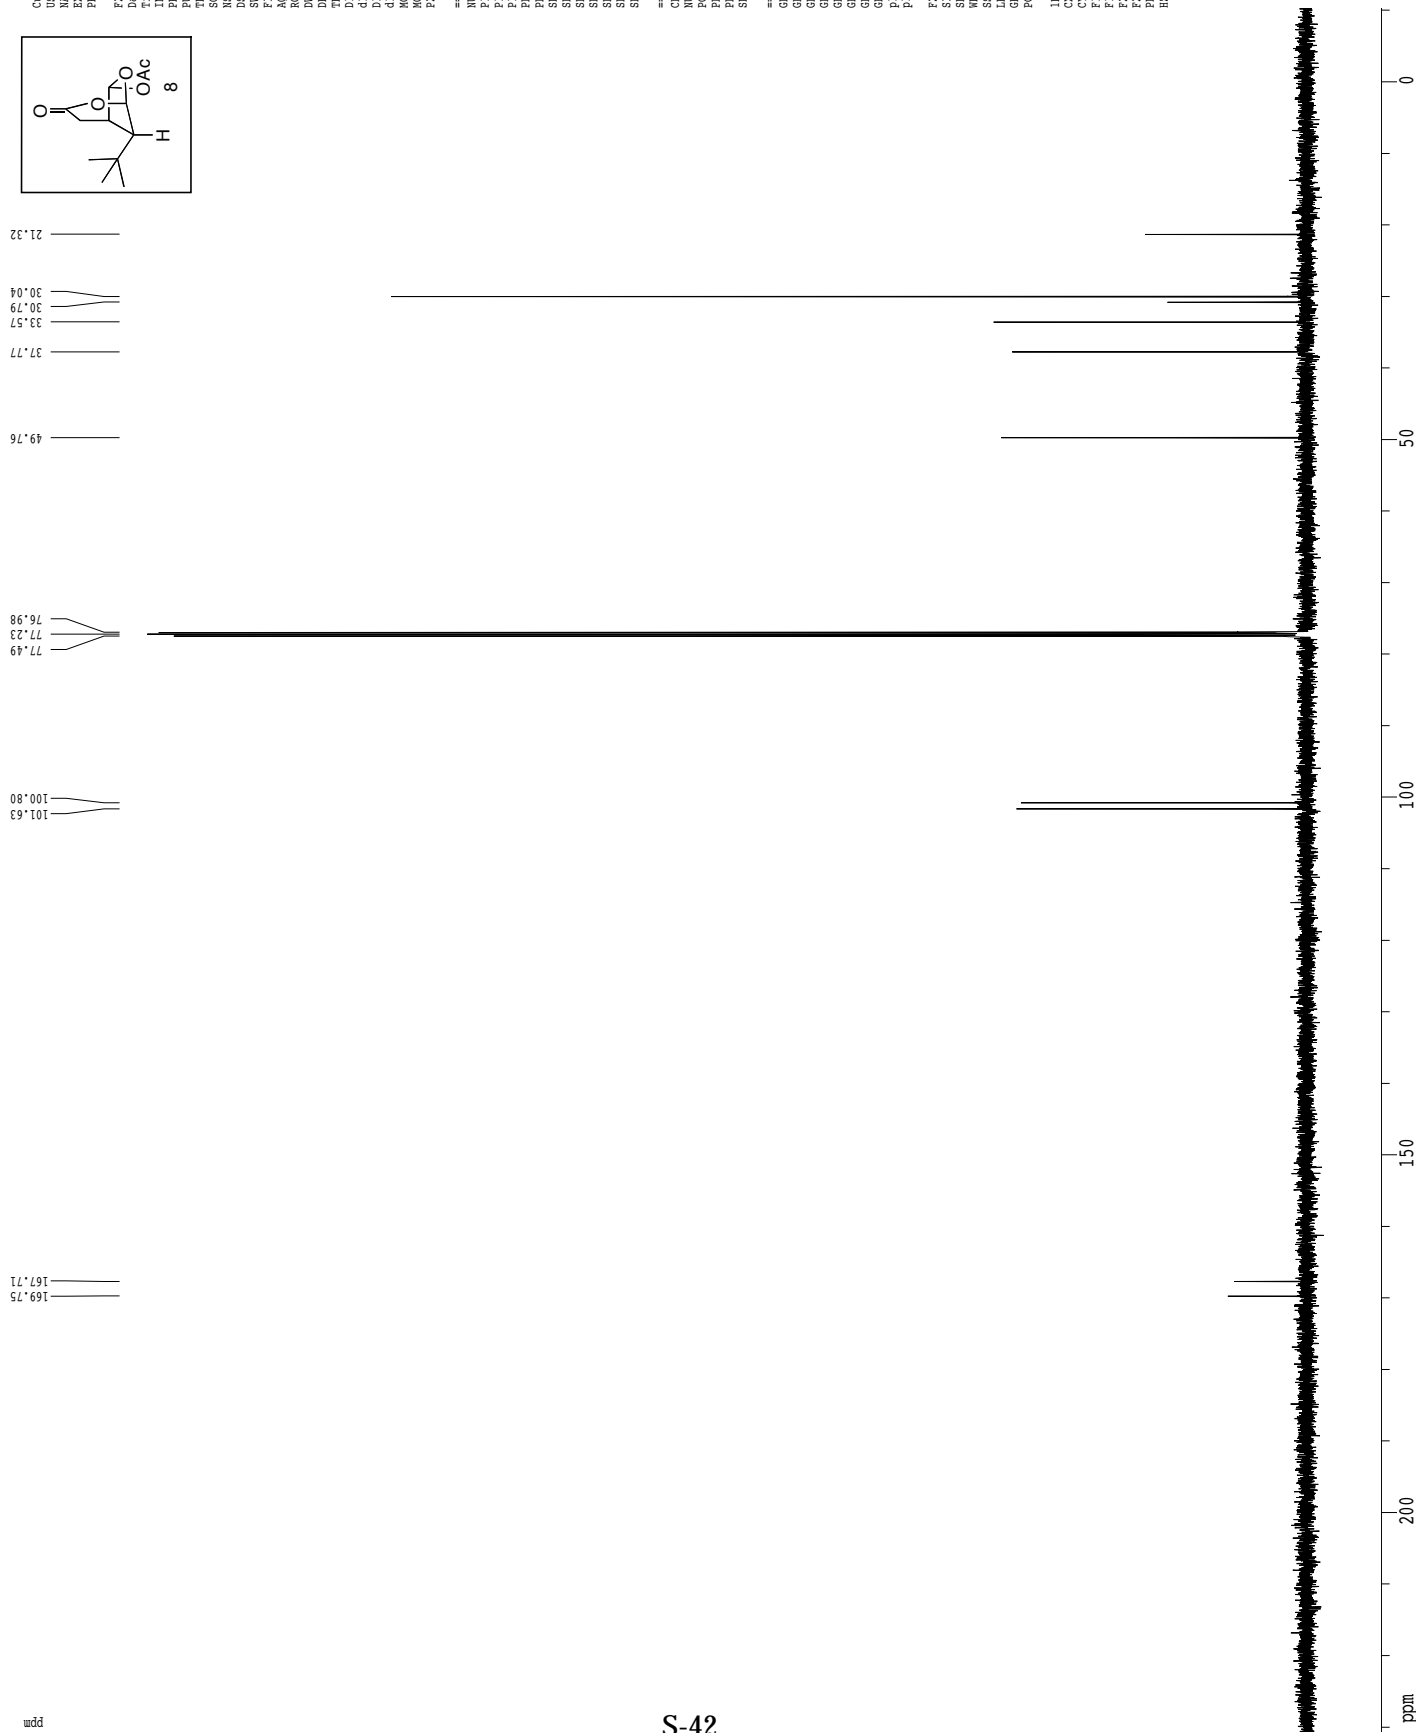

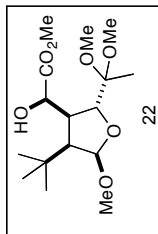

Current Data Parameters  
 USER schner  
 NAME ms1-262-3conc  
 EXPNO 1  
 PROCNO 1

F2 - Acquisition Parameters  
 Date\_ 20090520  
 Time 18.55  
 INSTRUM crys300  
 PULPROG zgpg30  
 PRGNAME 5 mm CPDPR1  
 FIDRES 0.098043 Hz  
 AQ 5.0998774 sec  
 RG 5.7  
 DW 62.400 usec  
 DE 6.00 usec  
 TE 298.0 K  
 MCRBST 0.1000000 sec  
 MCRBK 0.0000000 sec  
 MCRBK 0.01500000 sec

==== CHANNEL f1 =====  
 NUCL 1H  
 P1 7.50 usec  
 PL1 1.60 dB  
 SFO1 500.2235015 MHz

F2 - Processing parameters  
 SI 65536  
 SF 500.2230412 MHz  
 WDW EM  
 SS 0.30 Hz  
 GB 0  
 PC 4.00

1D NMR plot parameters  
 CX 22.80 cm  
 CY 15.00 cm  
 F1P 9.937 ppm  
 F1 49770.53 Hz  
 F2P -0.709 ppm  
 F2 -354.71 Hz  
 PRCH 0.46692 ppm/cm  
 HZCX 231.96311 Hz/cm

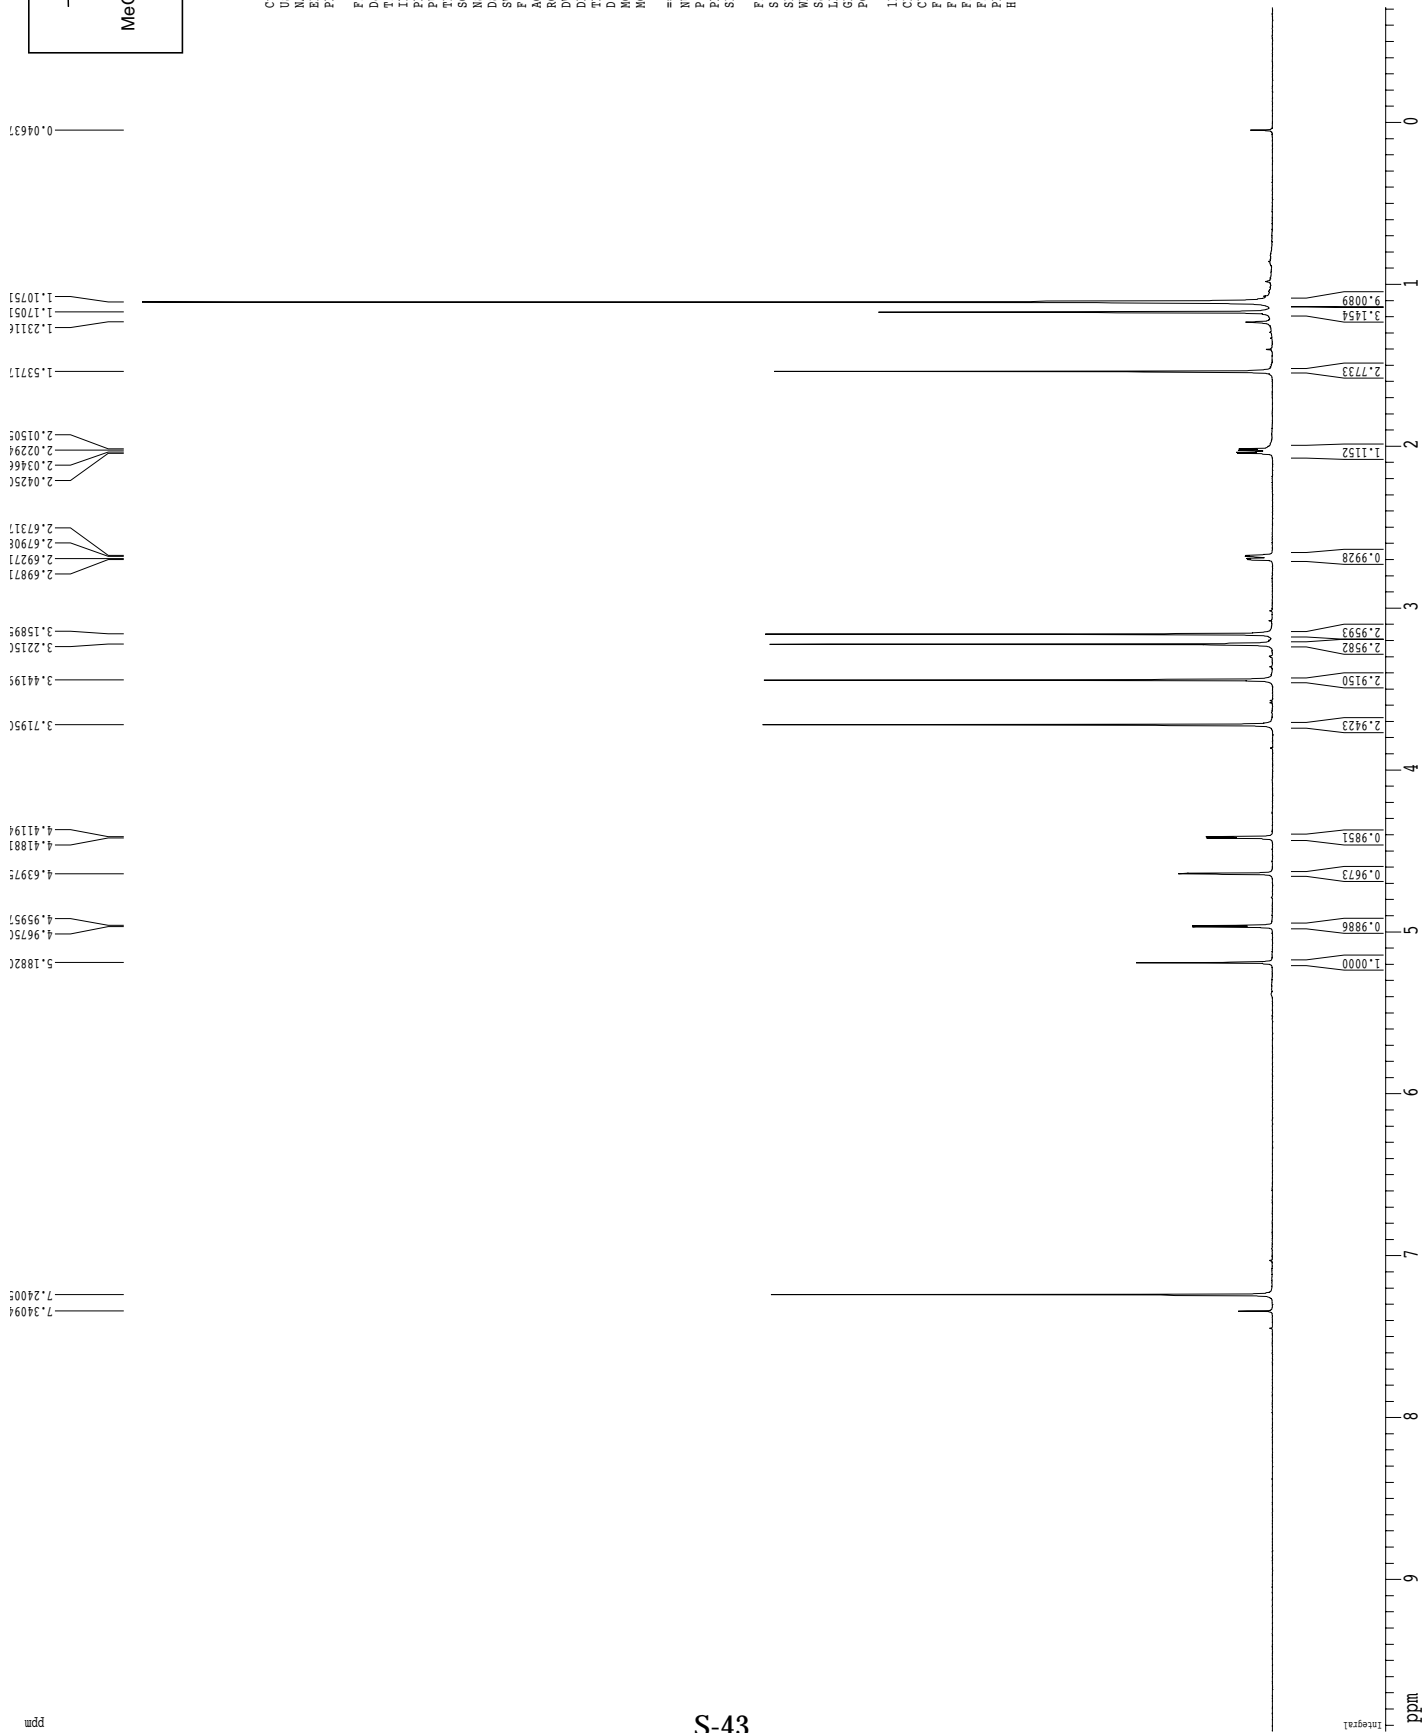



<sup>1</sup>H spectrum

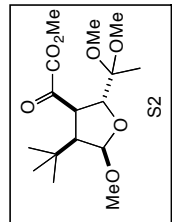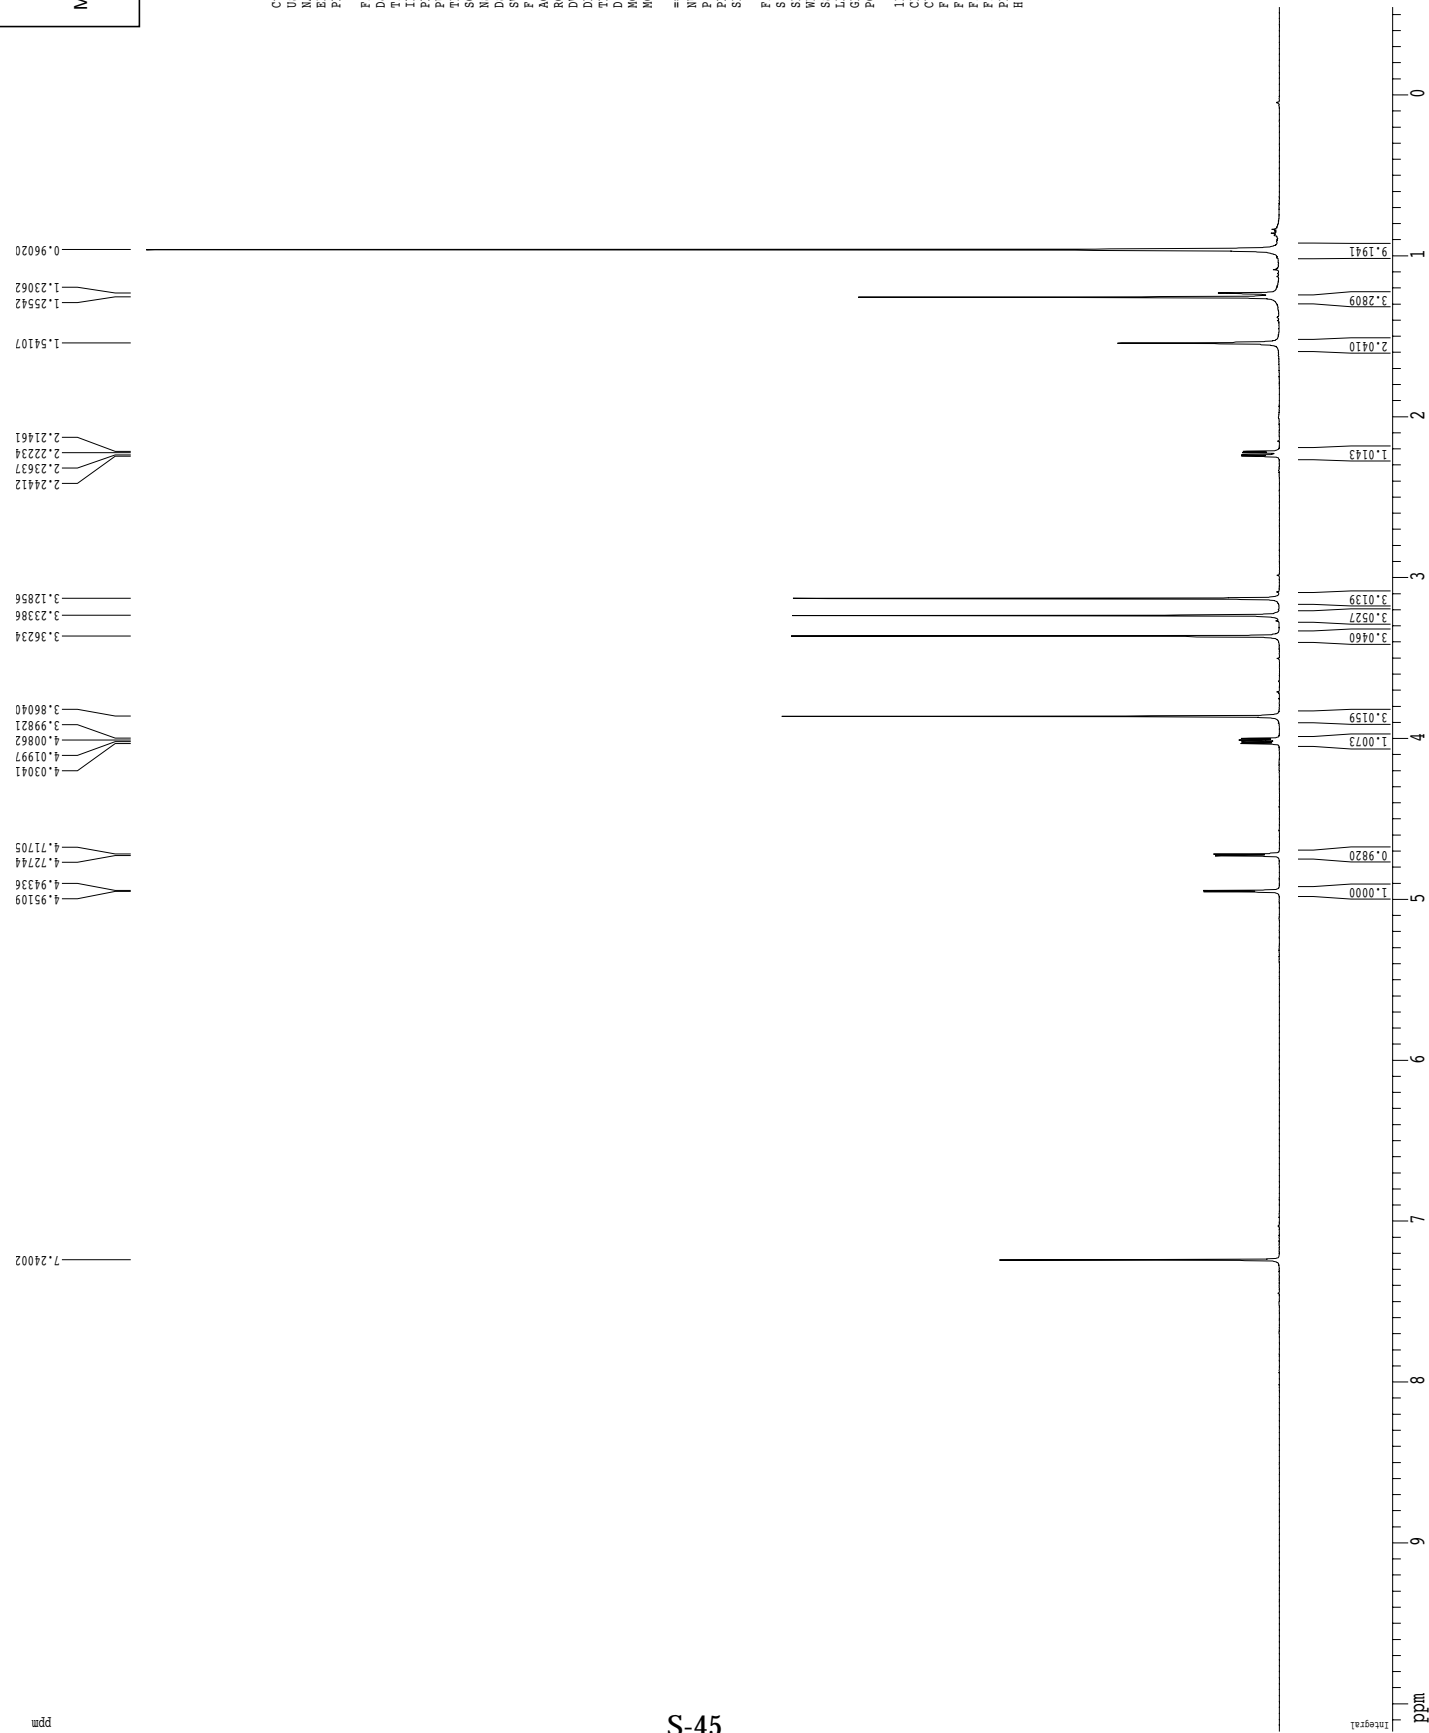

Current Data Parameters  
 USER: schner  
 NAME: msj-262-32d  
 EXPNO: 1  
 PROCNO: 1

F2 - Acquisition Parameters  
 Date\_: 20090512  
 Time: 9.00  
 INSTRUM: cryo500  
 PROBHD: 5 mm CPCL1 IH-  
 PULPROG: zgpg30  
 TD: 65536  
 SOLVENT: CDCl3  
 NS: 8  
 DS: 2  
 SWH: 8012.820 Hz  
 FIDRES: 0.098043 Hz  
 AQ: 5.0998774 sec  
 RG: 6.3  
 DW: 62.400 usec  
 DE: 6.00 usec  
 TE: 298.0 K  
 D1: 0.10000000 sec  
 ACQRESF: 0.00000000 sec  
 PCPRGK: 0.01000000 sec

==== CHANNEL f1 =====  
 NUC1: <sup>1</sup>H  
 P1: 7.50 usec  
 PL1: 1.60 dB  
 SFO1: 500.2235015 MHz

F2 - Processing parameters  
 SI: 65536  
 SF: 500.2200412 MHz  
 WDW: EM  
 SSB: 0  
 CB: 0.50 Hz  
 GC: 4.00

1D NMR plot parameters  
 CX: 22.80 cm  
 CY: 15.00 cm  
 FIP: 10.170 ppm  
 F1: 5087.02 Hz  
 F2: -0.543 ppm  
 F2: -271.50 Hz  
 PPMCH: 0.46984 ppm/cm  
 HZCH: 235.02289 Hz/cm

Z-restored spin-echo <sup>13</sup>C spectrum with <sup>1</sup>H decoupling

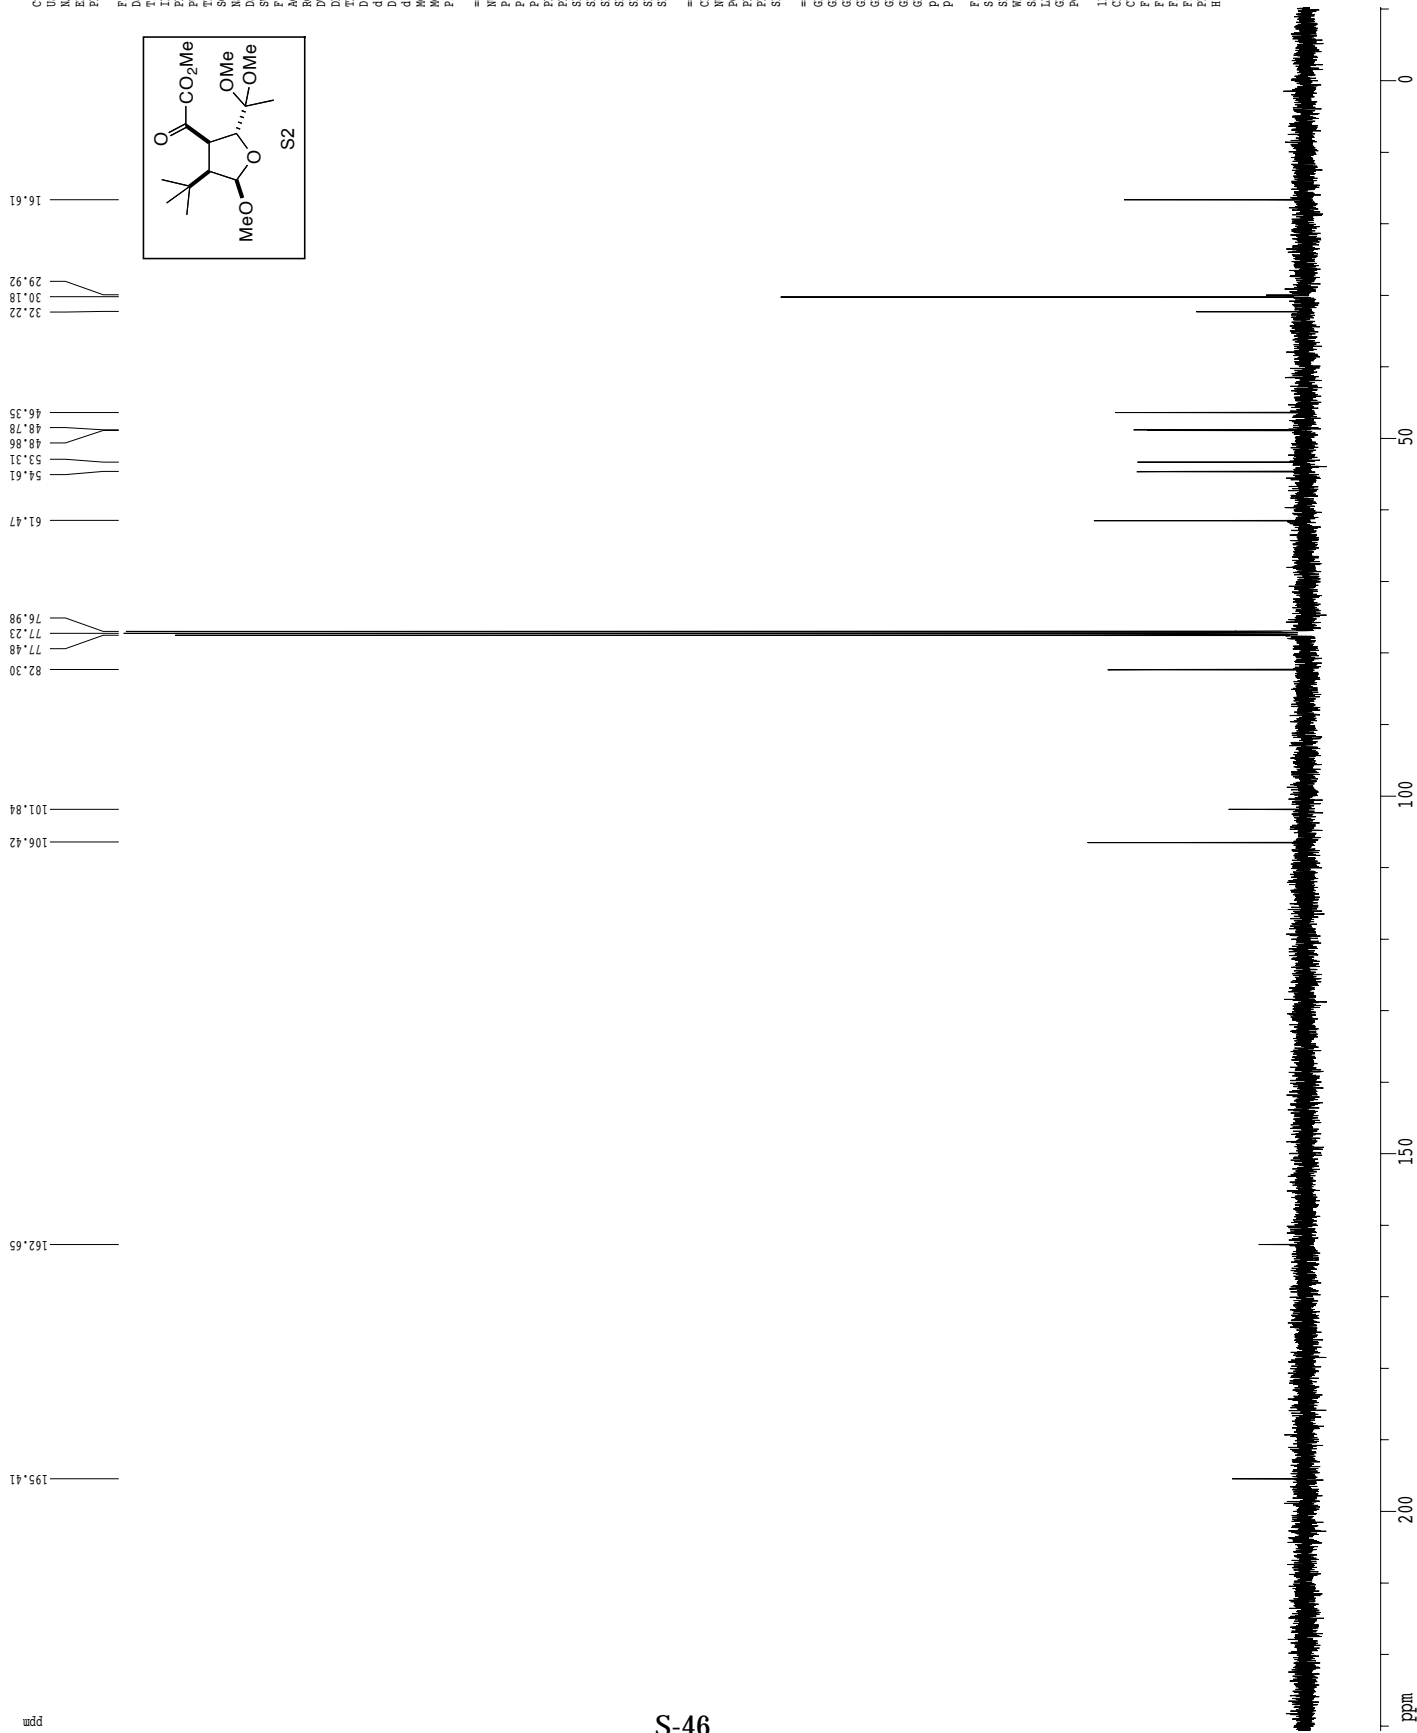

Z-restored spin-echo <sup>13</sup>C spectrum with <sup>1</sup>H decoupling

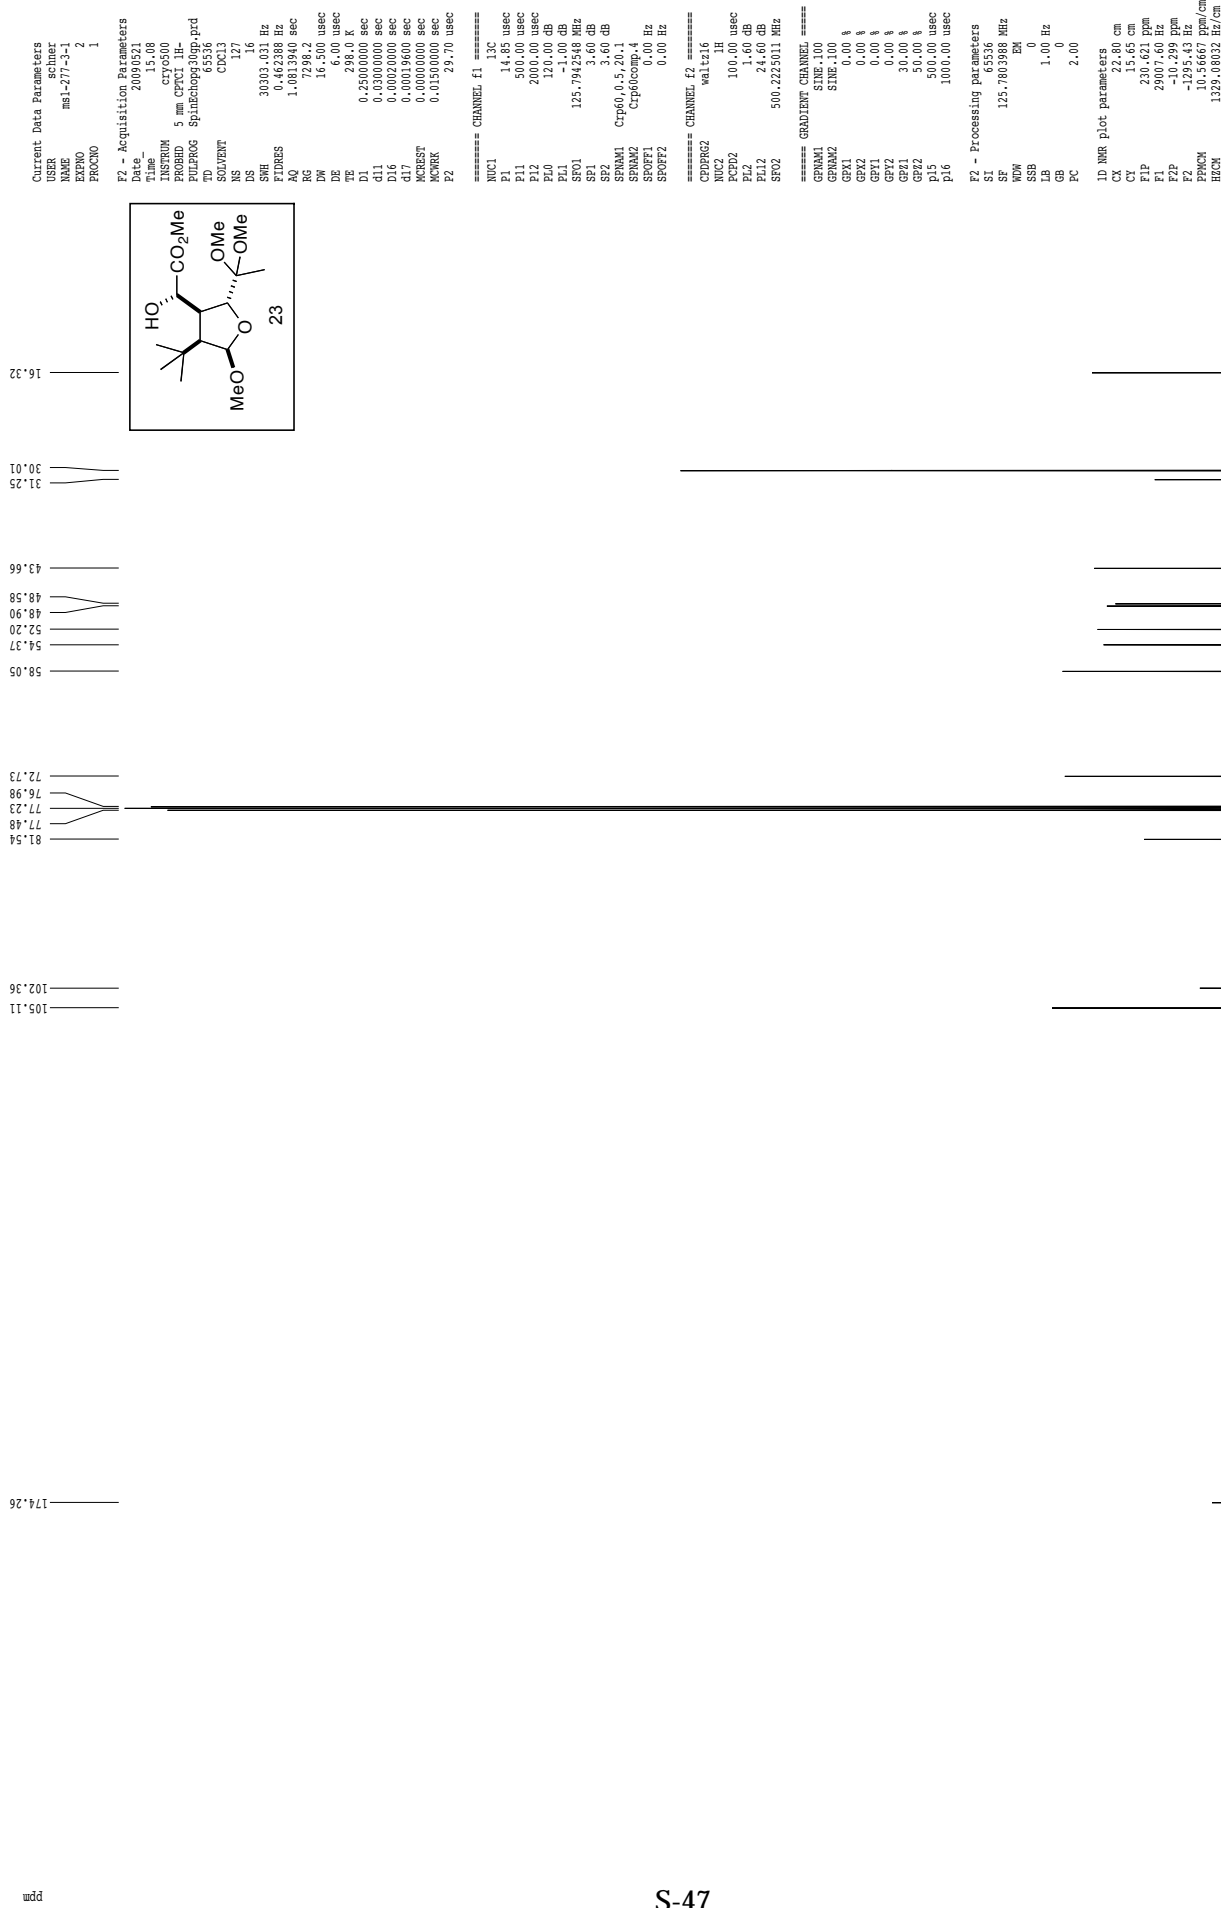

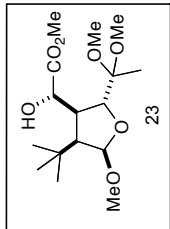

Current Data Parameters  
 USER schner  
 NAME msj-777-3-1  
 EXPNO 1  
 PROCNO 1

F2 - Acquisition Parameters  
 Date\_ 20090521  
 Time 15.06  
 INSTRUM cryo500  
 PROBD0 5 mm CPCLP IH-  
 PULPROG zgpg30  
 SOLVENT CDCl3  
 NS 11  
 DS 2  
 SWH 8012.820 Hz  
 FIDRES 0.098043 Hz  
 AQ 5.0998774 sec  
 RG 5  
 DW 62.400 usec  
 DE 6.00 usec  
 TE 298.0 K  
 D1 0.10000000 sec  
 ACRESF 0.00000000 sec  
 ACWRK 0.01000000 sec

==== CHANNEL f1 =====  
 NUCL1 1H  
 P1 7.50 usec  
 PL1 1.60 dB  
 SFO1 500.2235015 MHz

F2 - Processing parameters  
 SI 65536  
 SF 500.2200410 MHz  
 WDW EM  
 SSB 0  
 B 0.50 Hz  
 GB 0  
 PC 4.00

1D NMR plot parameters  
 CX 22.80 cm  
 CY 15.00 cm  
 FIP 9.821 ppm  
 F1 4912.53 Hz  
 F2P -0.941 ppm  
 F2 -4770.95 Hz  
 PERCH 0.47203 ppm/cm  
 HZCX 236.11771 Hz/cm

1H spectrum

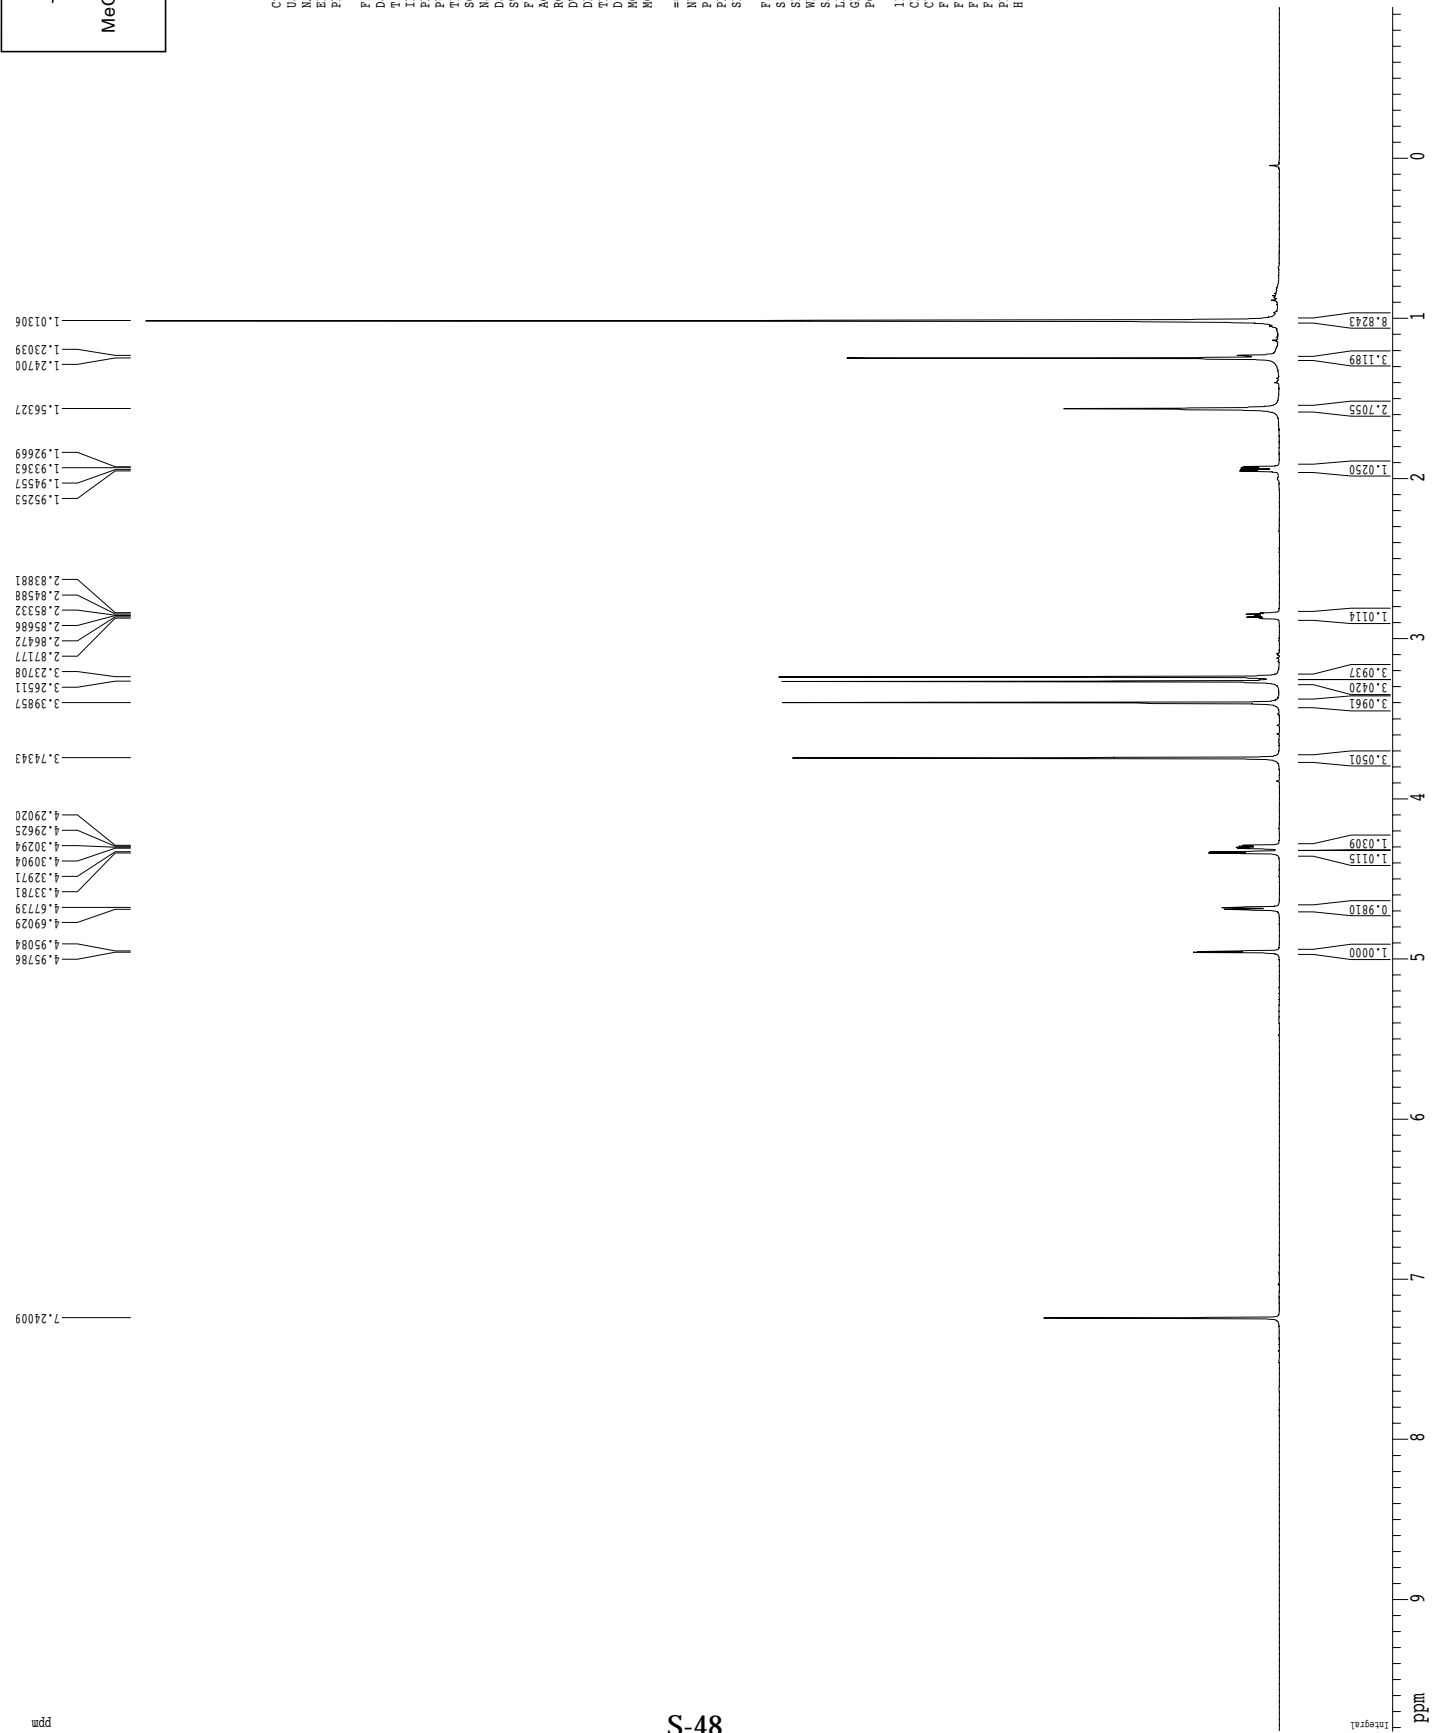



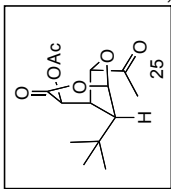

Current Data Parameters  
 USER: schner  
 NAME: msl-281-3c13  
 EXPNO: 1  
 PROCNO: 1

F2 - Acquisition Parameters  
 Date\_: 20090526  
 Time: 8.43  
 INSTRUM: cryo500  
 PROBHD: 5 mm CPCLP1H-1  
 PULPROG: zgpg30  
 SOLVENT: CDCl3  
 NS: 7  
 DS: 2  
 SWH: 8012.820 Hz  
 FIDRES: 0.098043 Hz  
 AQ: 5.0998774 sec  
 RG: 10.1  
 DW: 62.400 usec  
 DE: 6.00 usec  
 TE: 298.0 K  
 D1: 0.10000000 sec  
 ACQRESF: 0.00000000 sec  
 ACWRK: 0.01000000 sec

==== CHANNEL f1 =====  
 NUC1: 1H  
 P1: 7.50 usec  
 PL1: 1.60 dB  
 SFO1: 500.2235015 MHz

F2 - Processing parameters  
 SI: 65536  
 SF: 500.2200413 MHz  
 WDW: EM  
 SSB: 0  
 GB: 0.00 Hz  
 PC: 4.00

ID NMR plot parameters  
 CX: 22.80 cm  
 CY: 15.00 cm  
 FIP: 10.352 ppm  
 F1: 5178.42 Hz  
 F2P: -0.926 ppm  
 F2: -463.00 Hz  
 PPMCH: 0.49464 ppm/cm  
 HZCH: 247.43095 Hz/cm

1H spectrum

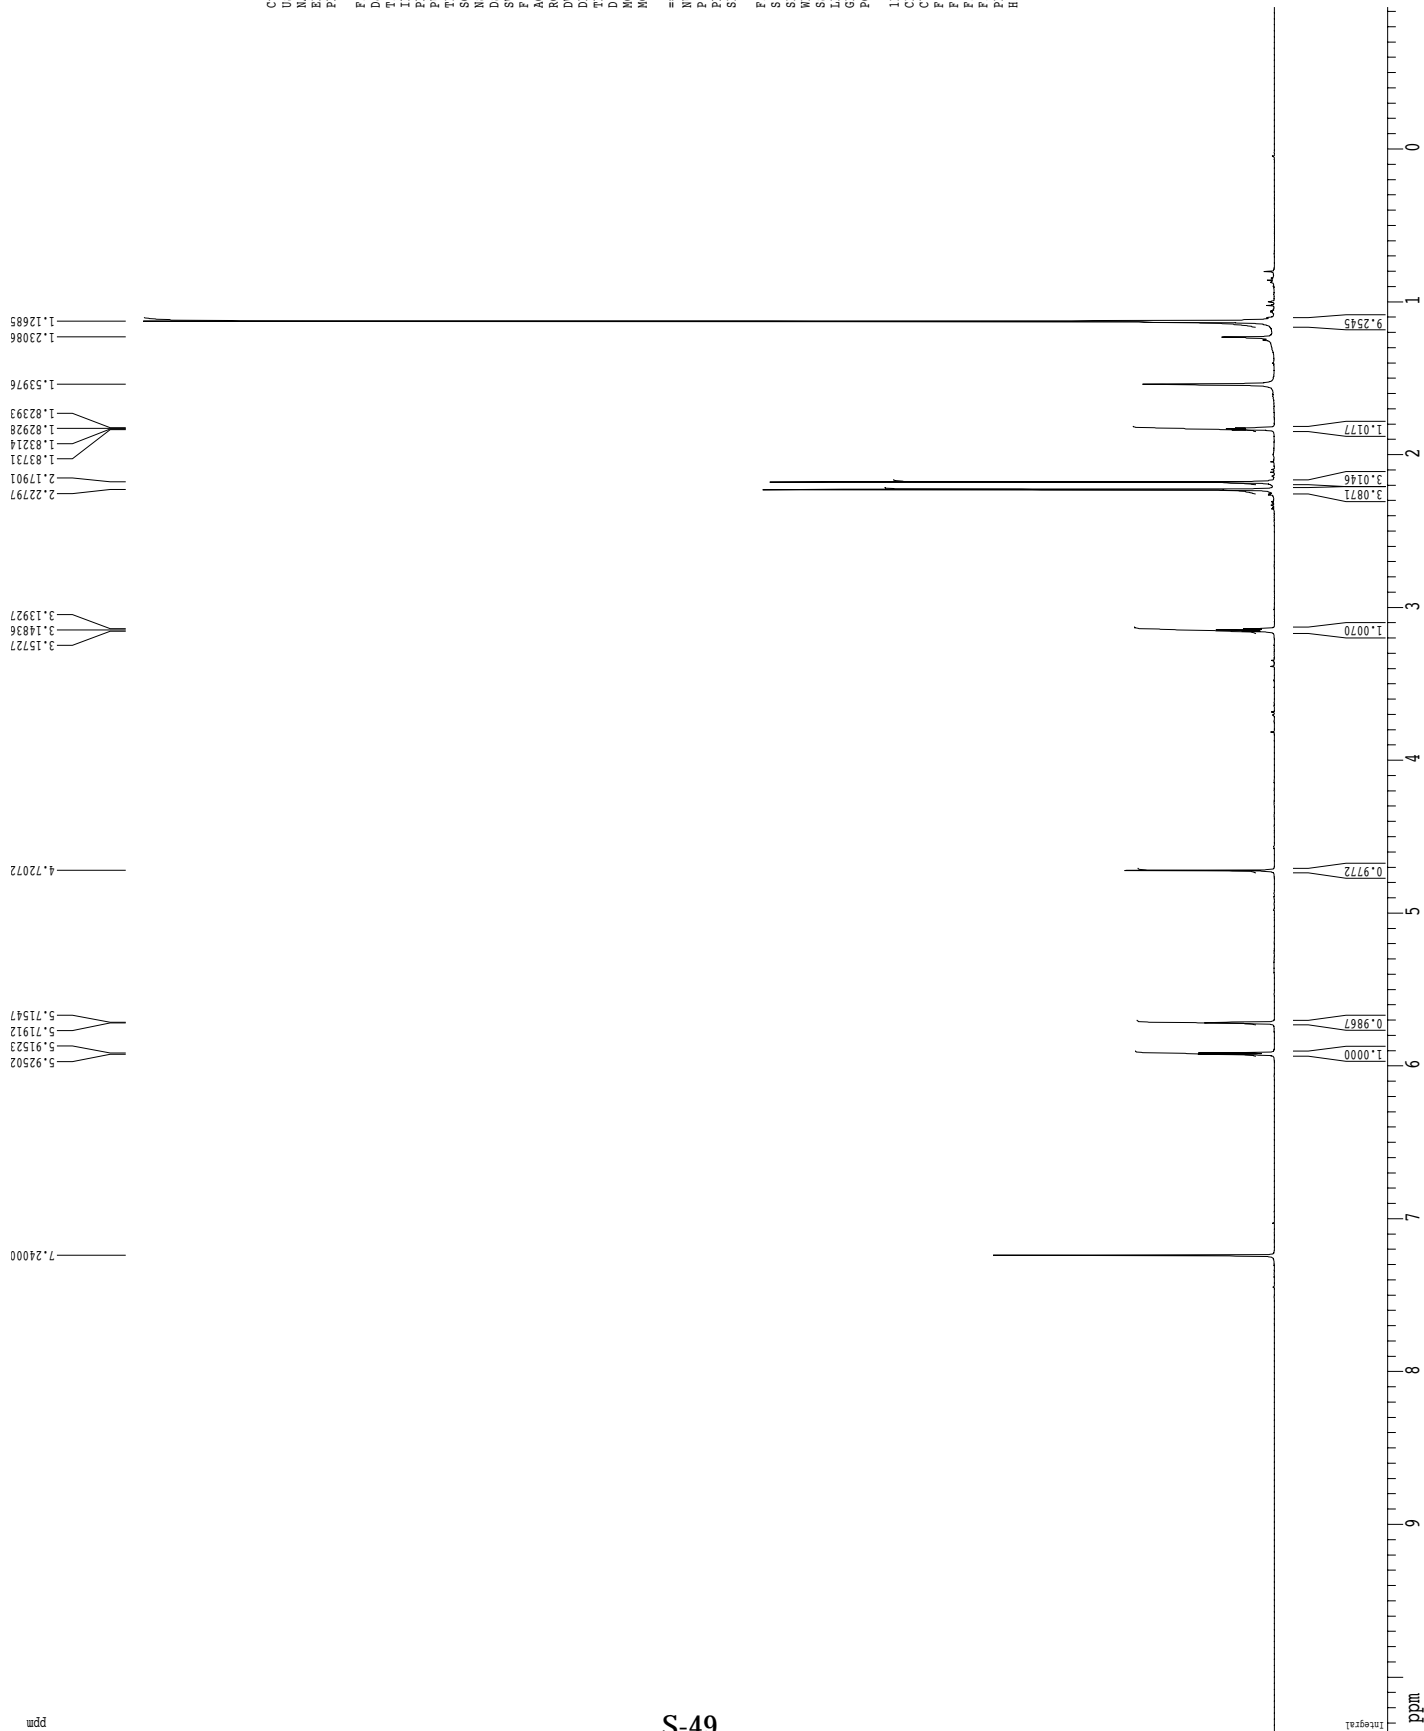

Z-restored spin-echo <sup>13</sup>C spectrum with 1H decoupling

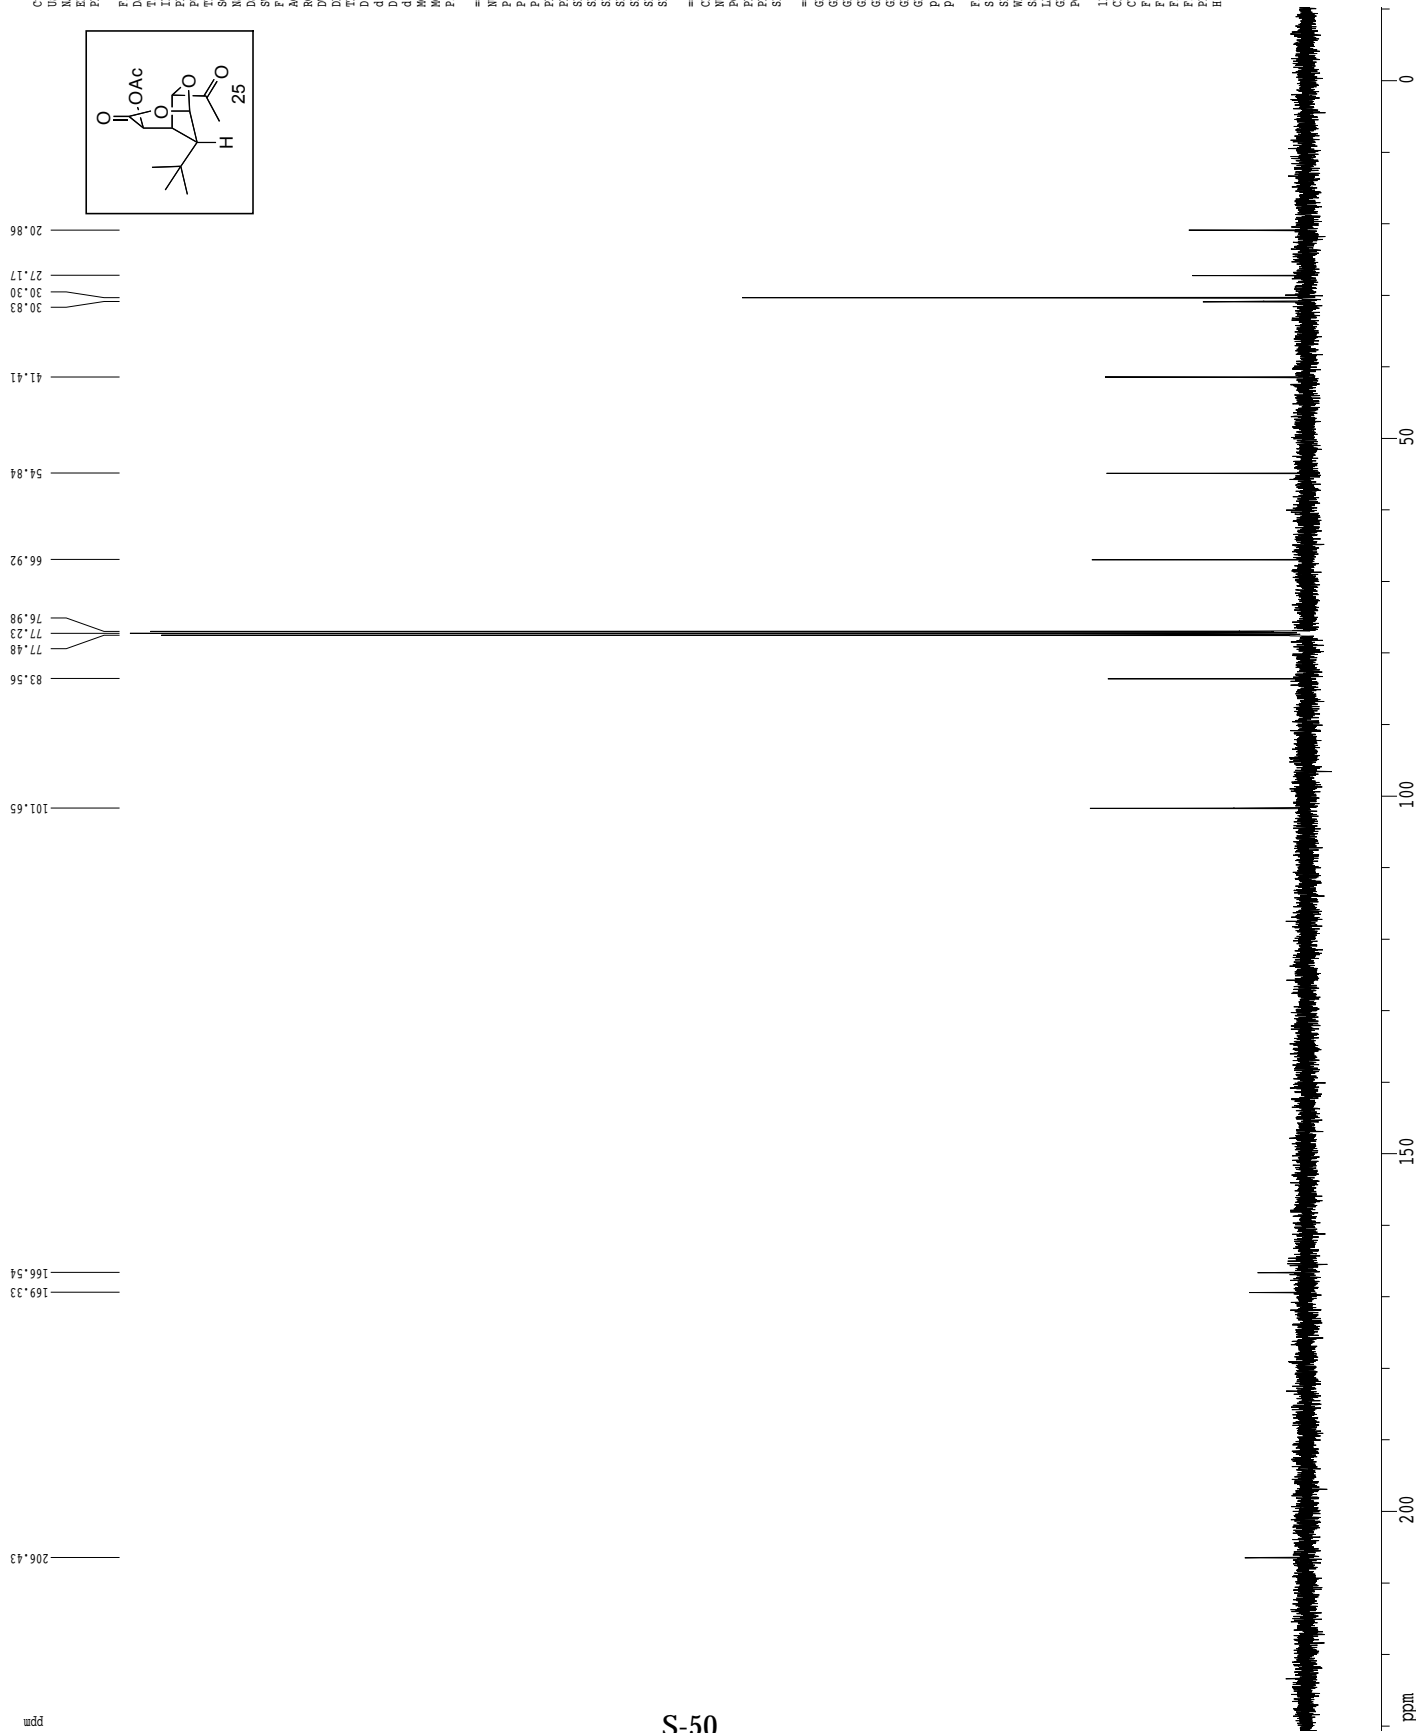

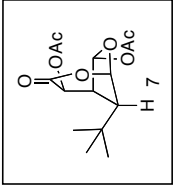

Current Data Parameters  
 USER schner  
 NAME ms02-33-3c13long  
 EXPNO 1  
 PROCNO 1

F2 - Acquisition Parameters  
 Date\_ 20090620  
 Time 18:07  
 INSTRUM cryo300  
 PULPROG zgpg30  
 PRGNAME 5 mm CPAC1  
 FIDRES 0.098043 Hz  
 AQ 5.0998774 sec  
 RG 6.3  
 DW 62.400 usec  
 DE 6.00 usec  
 TE 298.0 K  
 MCREST 0.1000000 sec  
 MCHNK 0.01500000 sec

==== CHANNEL f1 =====  
 NUCL 1H  
 P1 7.50 usec  
 PL1 1.60 dB  
 SFO1 500.2235015 MHz

F2 - Processing parameters  
 SI 65536  
 SF 500.2200409 MHz  
 WDW EM  
 SSB 0  
 GB 0  
 PC 4.00

1D NMR plot parameters  
 CX 22.80 cm  
 CY 15.00 cm  
 F1P 10.021 ppm  
 F1 5012.50 Hz  
 F2P -0.991 ppm  
 F2 -495.80 Hz  
 PRCH 0.48287 ppm/cm  
 HZCX 241.59184 Hz/cm

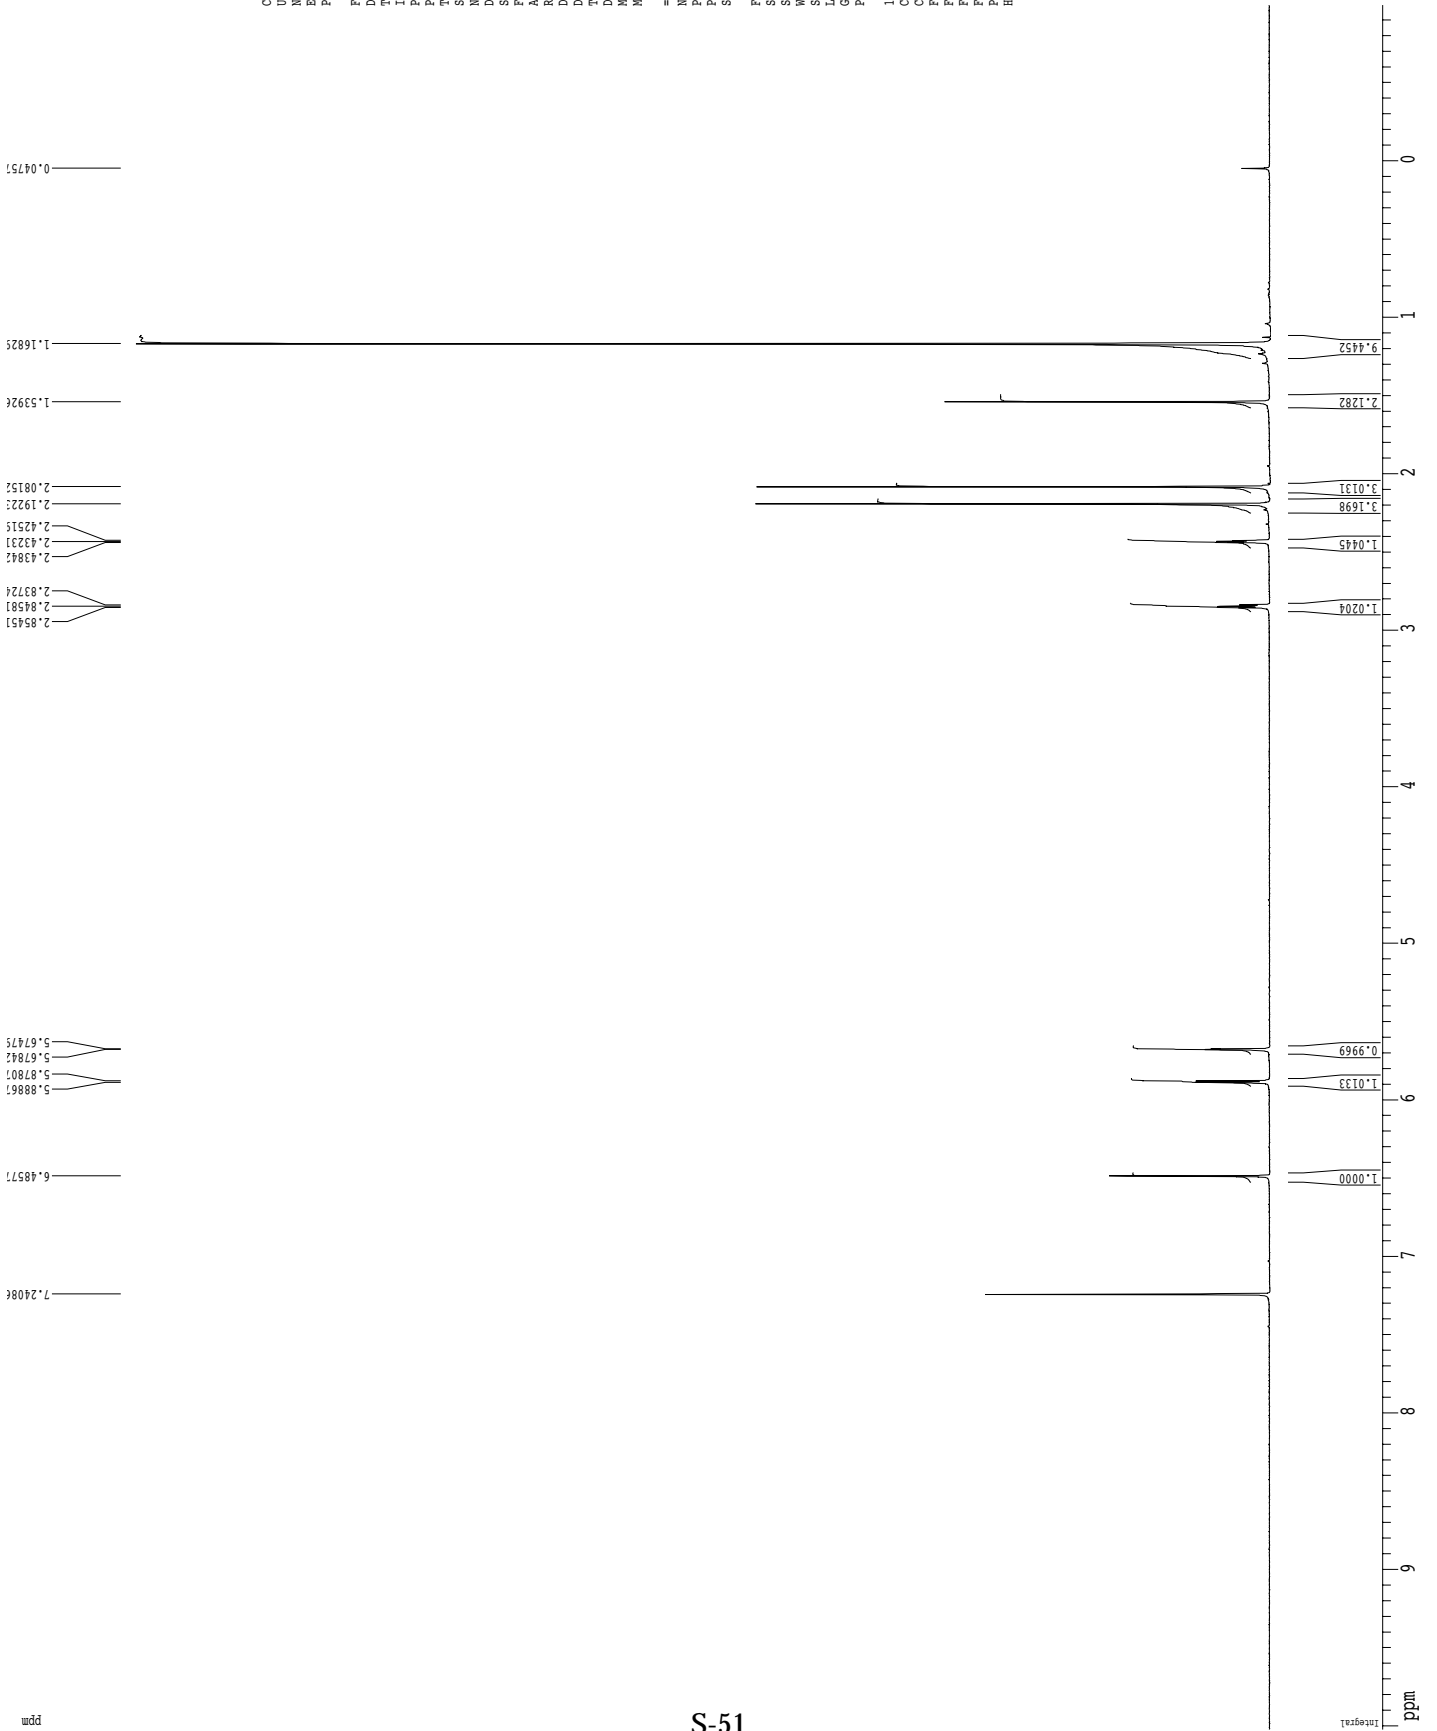

Z-restored spin-echo <sup>13</sup>C spectrum with <sup>1</sup>H decoupling

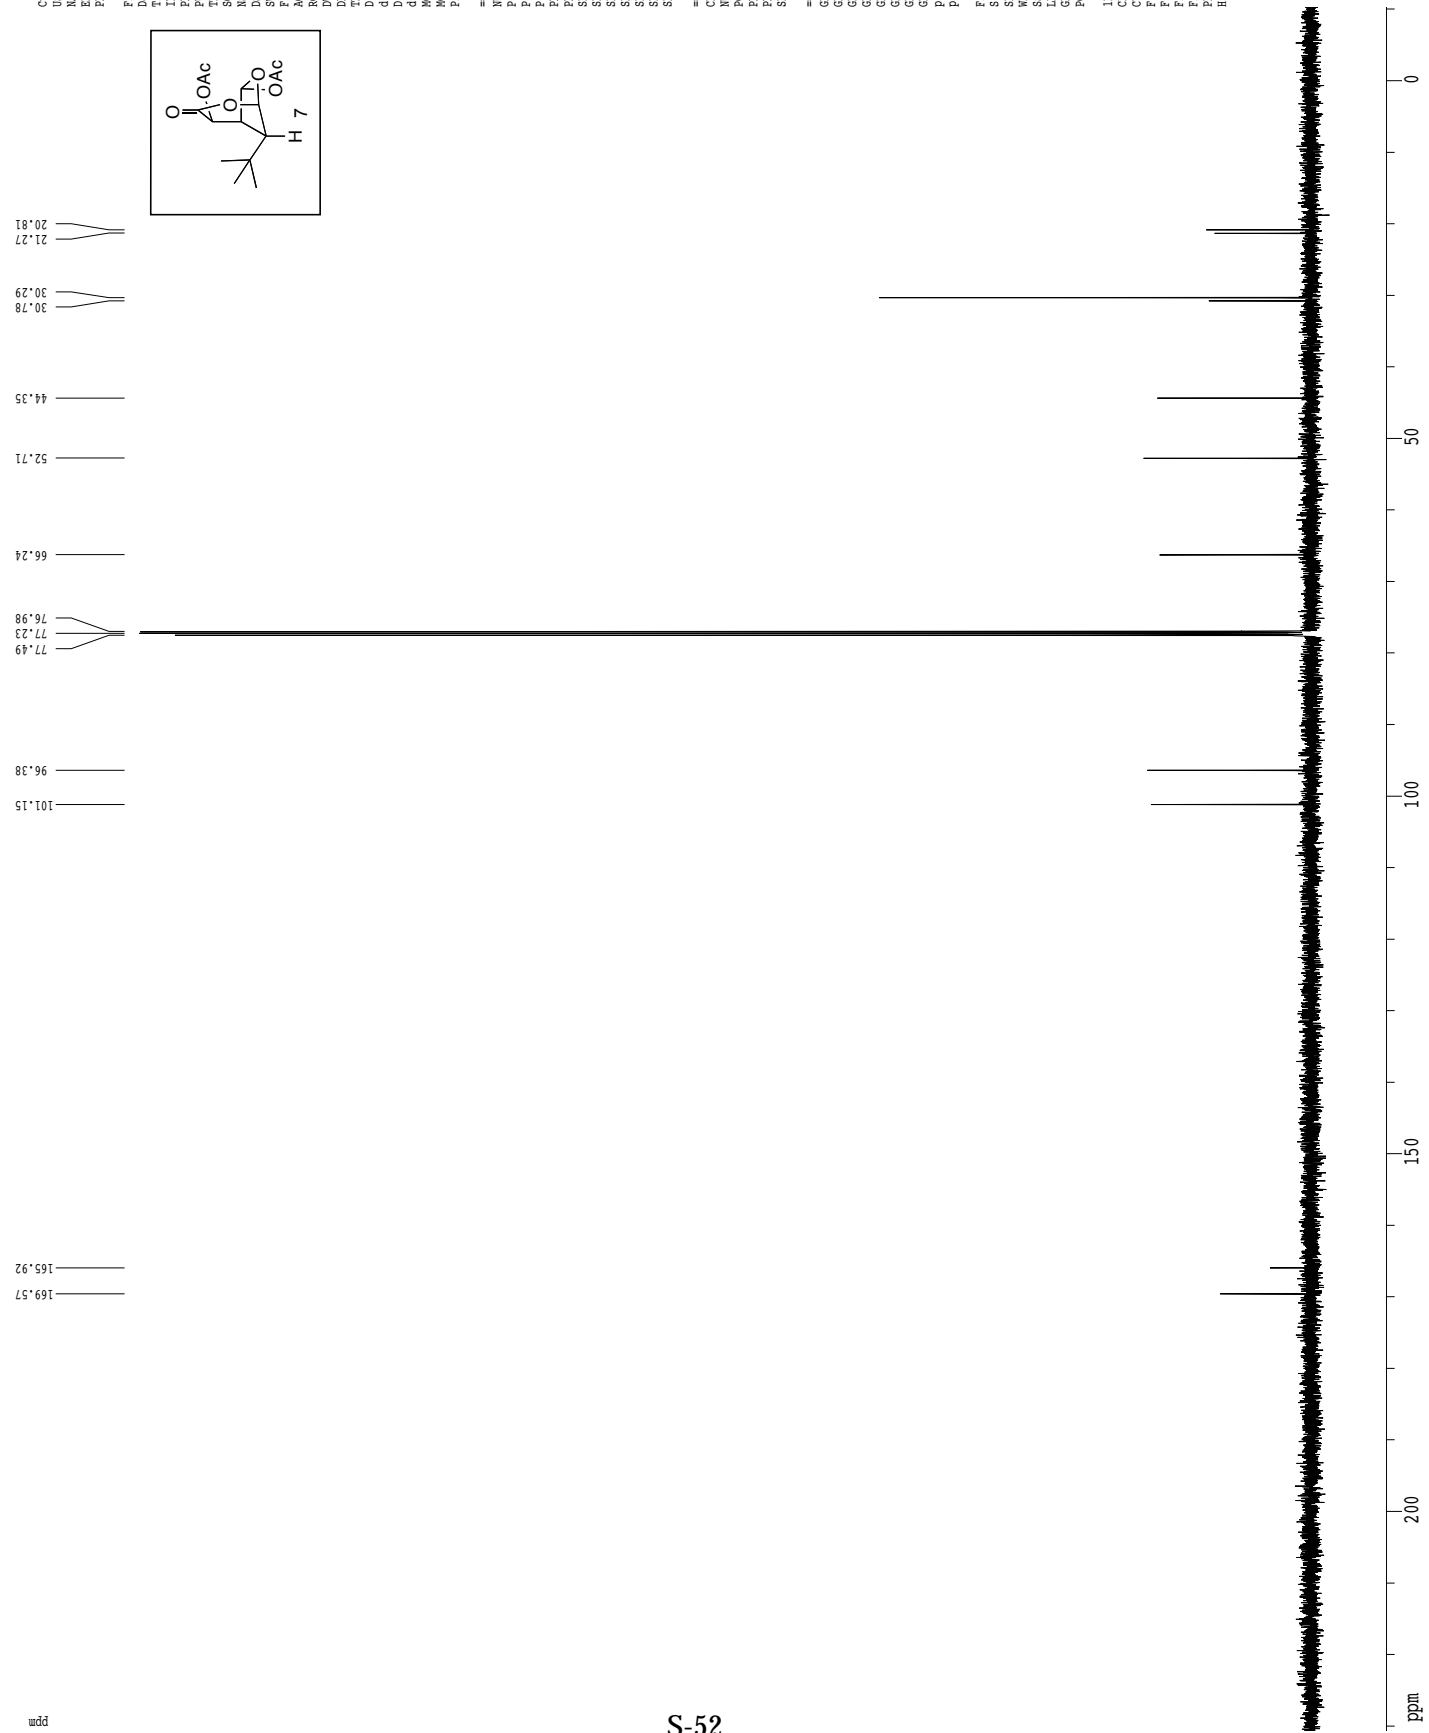

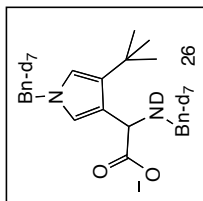

Current Data Parameters  
 USER: schner  
 NAME: ms02-150-2d  
 EXPNO: 1  
 PROCNO: 1

F2 - Acquisition Parameters  
 Date\_: 20091027  
 Time: 6:38  
 INSTRUM: crys300  
 PULPROG: zgpg30  
 PREROG: 5 mm CPXCL  
 TD: 81728  
 SOLVENT: THF  
 NS: 19  
 DS: 2  
 SWH: 8012.820 Hz  
 FIDRES: 0.098043 Hz  
 AQ: 5.0998774 sec  
 RG: 5  
 DW: 62.400 usec  
 DE: 6.00 usec  
 TE: 298.0 K  
 MCRSTP: 0.10000000 sec  
 MCRBK: 0.00000000 sec  
 MCRK1: 0.01500000 sec

==== CHANNEL f1 =====  
 NUCL1: 1H  
 P1: 7.50 usec  
 PL1: 1.60 dB  
 SFO1: 500.2235015 MHz

F2 - Processing parameters  
 SI: 65536  
 SF: 500.2209482 MHz  
 WDW: EM  
 SS: 0.30 Hz  
 GB: 0  
 PC: 4.00

1D NMR plot parameters  
 CX: 22.80 cm  
 CY: 15.00 cm  
 FIP: 8.000 ppm  
 F1: 4001.77 Hz  
 F2: 0.000 ppm  
 F2: 0.00 Hz  
 PRCH: 0.35088 ppm/cm  
 HZCX: 179.31613 Hz/cm

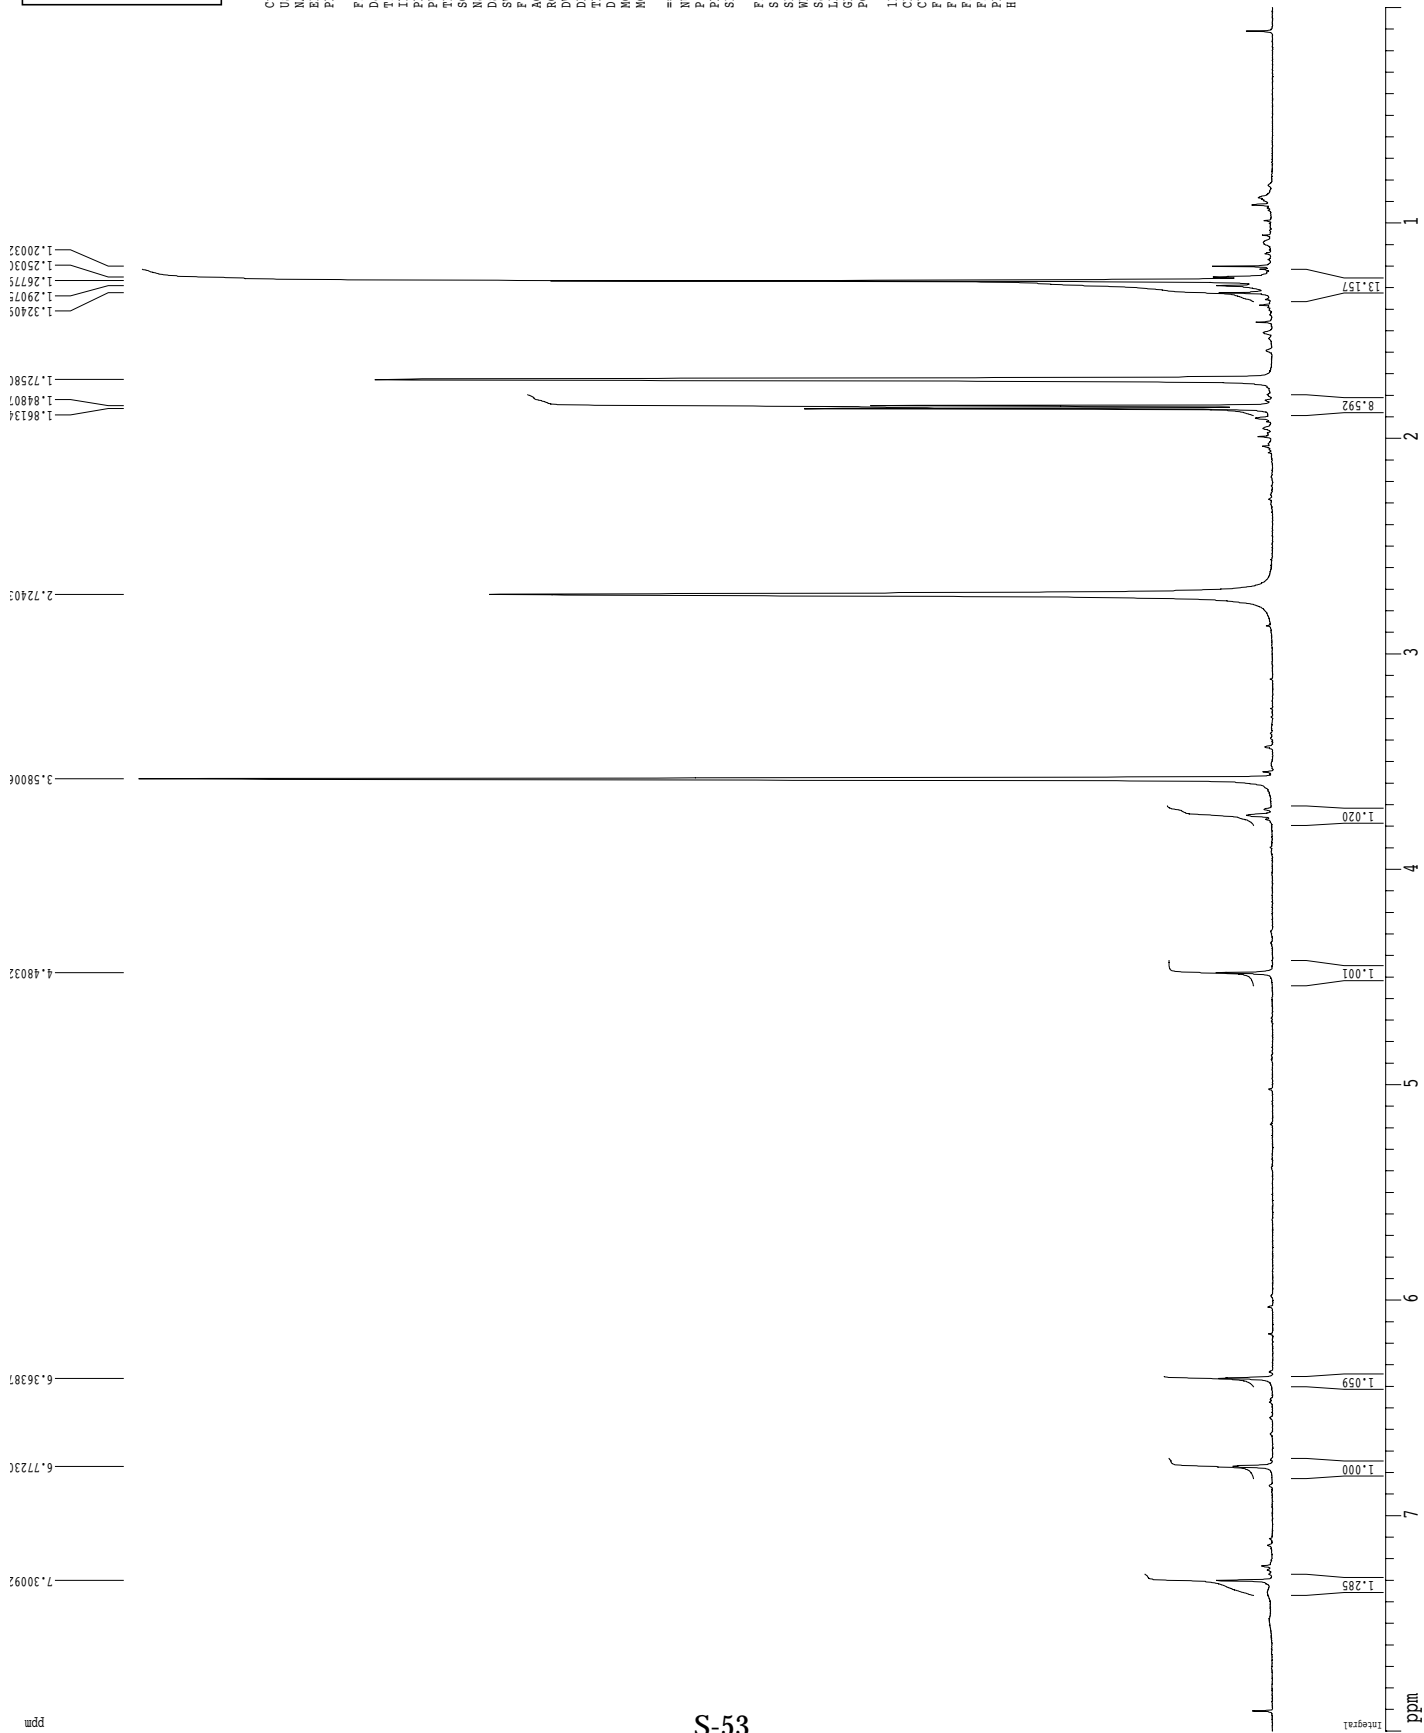

Z-restored spin-echo 13C spectrum with 1H decoupling

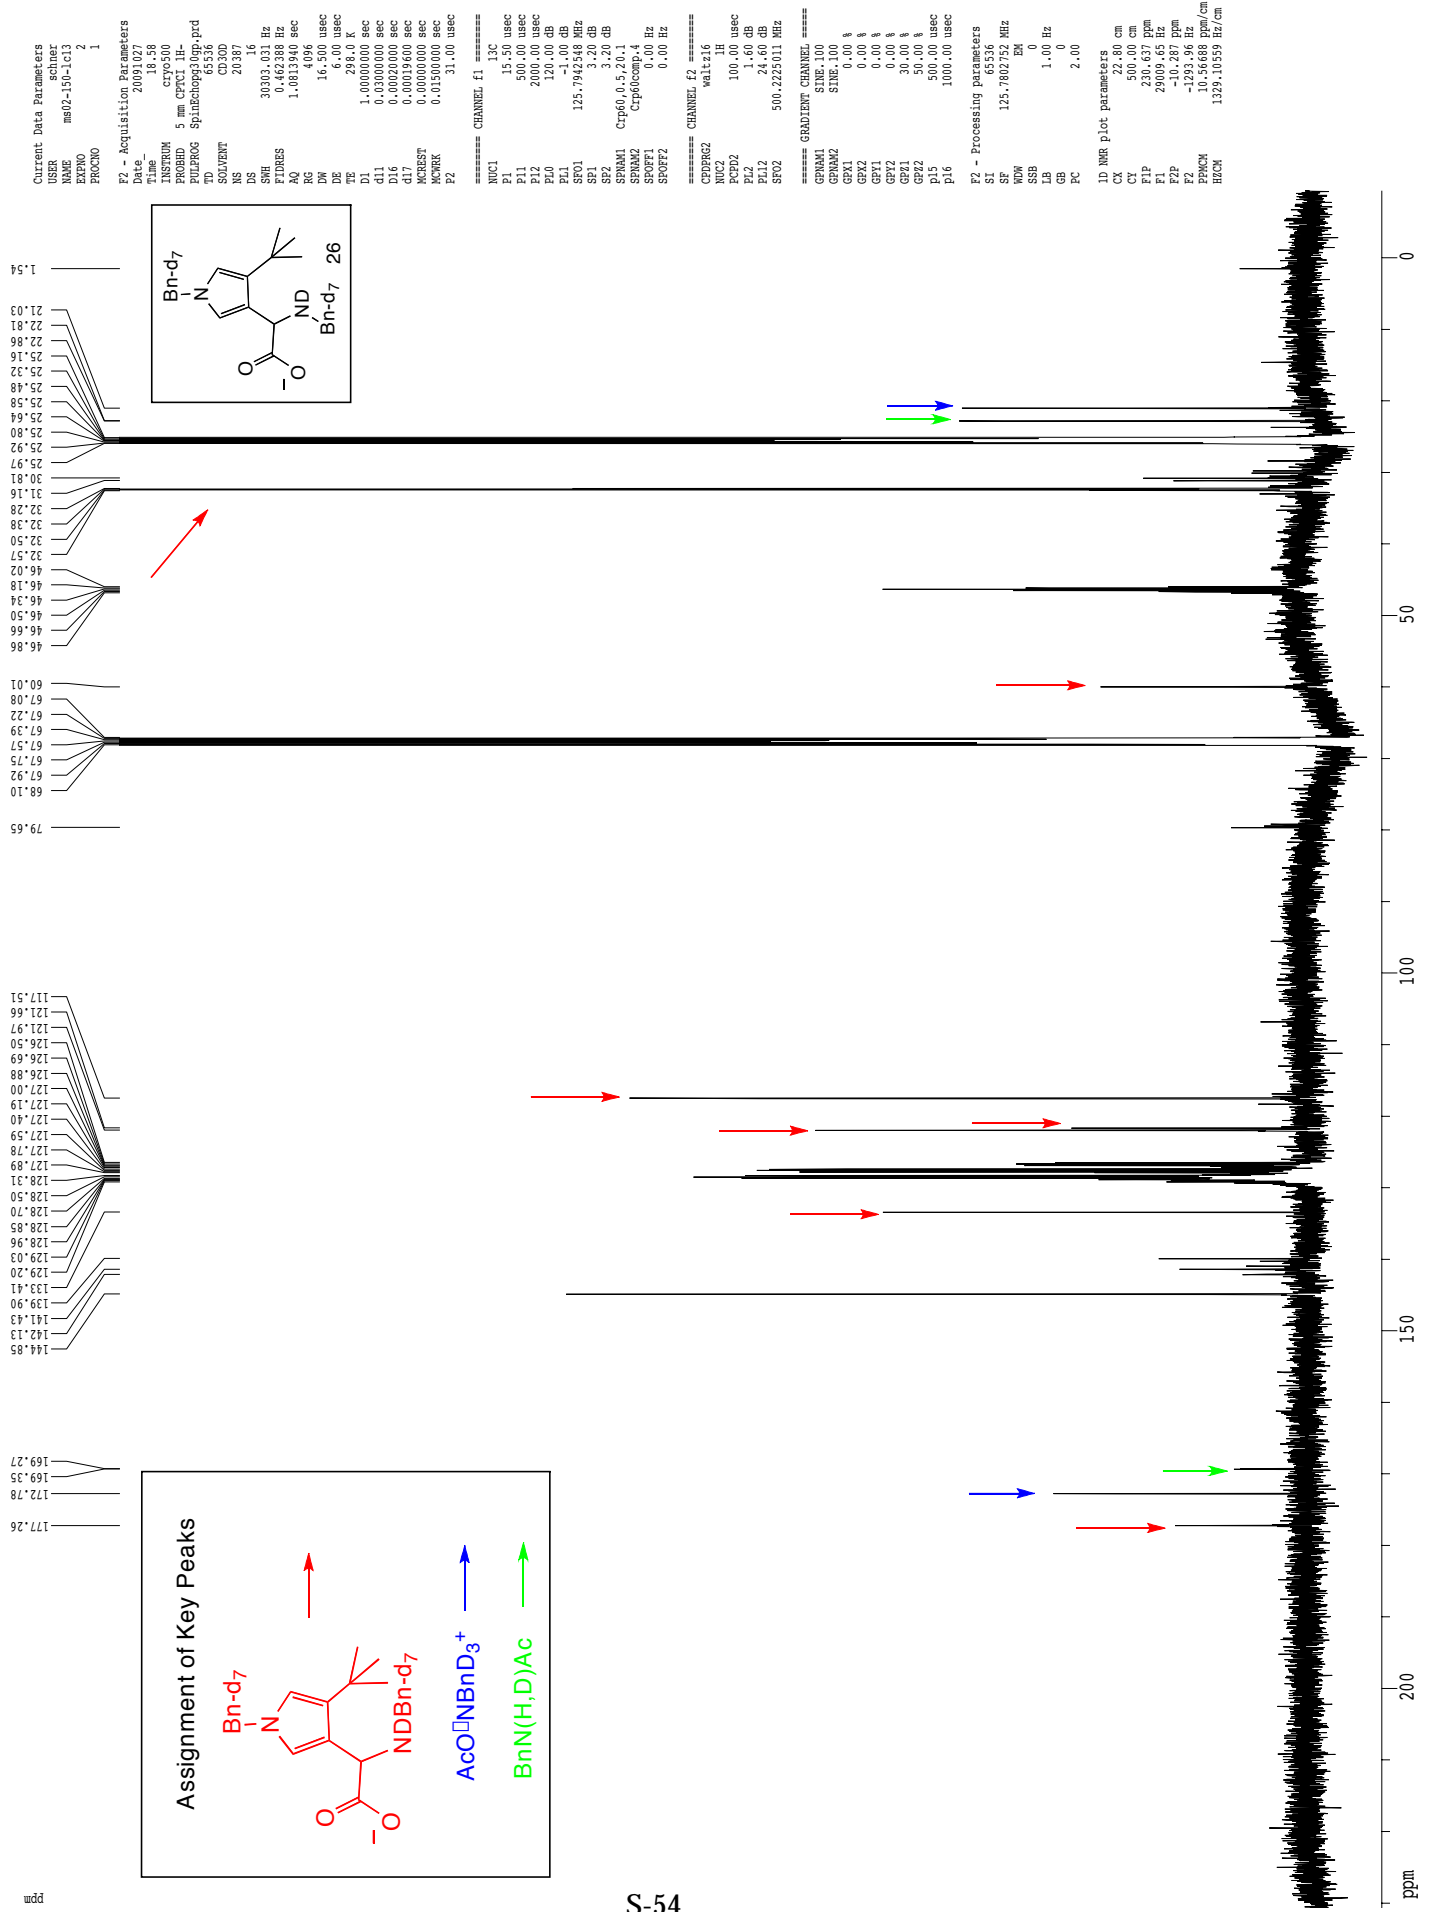

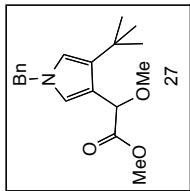

Current Data Parameters  
 USER schner  
 NAME ms02-155-2d  
 EXPNO 1  
 PROCNO 1

F2 - Acquisition Parameters  
 Date\_ 20091106  
 Time 7:11  
 INSTRUM crys900  
 PROBHD 5 mm CPXCL  
 PULPROG zgpg30  
 TD 81728  
 SOLVENT CDCl3  
 NS 7  
 DS 2  
 SWH 8012.820 Hz  
 FIDRES 0.098043 Hz  
 AQ 5.0998774 sec  
 RG 8  
 DW 62.400 usec  
 DE 6.00 usec  
 TE 298.0 K  
 MCREST 0.1000000 sec  
 MCHNK 0.01500000 sec

==== CHANNEL f1 =====  
 NUCL 1H  
 P1 7.50 usec  
 PL1 1.60 dB  
 SFO1 500.2235015 MHz

F2 - Processing parameters  
 SI 65536  
 SF 500.2230412 MHz  
 WDW EM  
 SS 0.30 Hz  
 GB 0  
 PC 4.00

1D NMR plot parameters  
 CX 22.80 cm  
 CY 15.00 cm  
 FIP 8.000 ppm  
 F1 4001.76 Hz  
 F2 -0.500 ppm  
 F2 -230.11 Hz  
 PRCH 0.37281 ppm/cm  
 HZCX 186.46355 Hz/cm

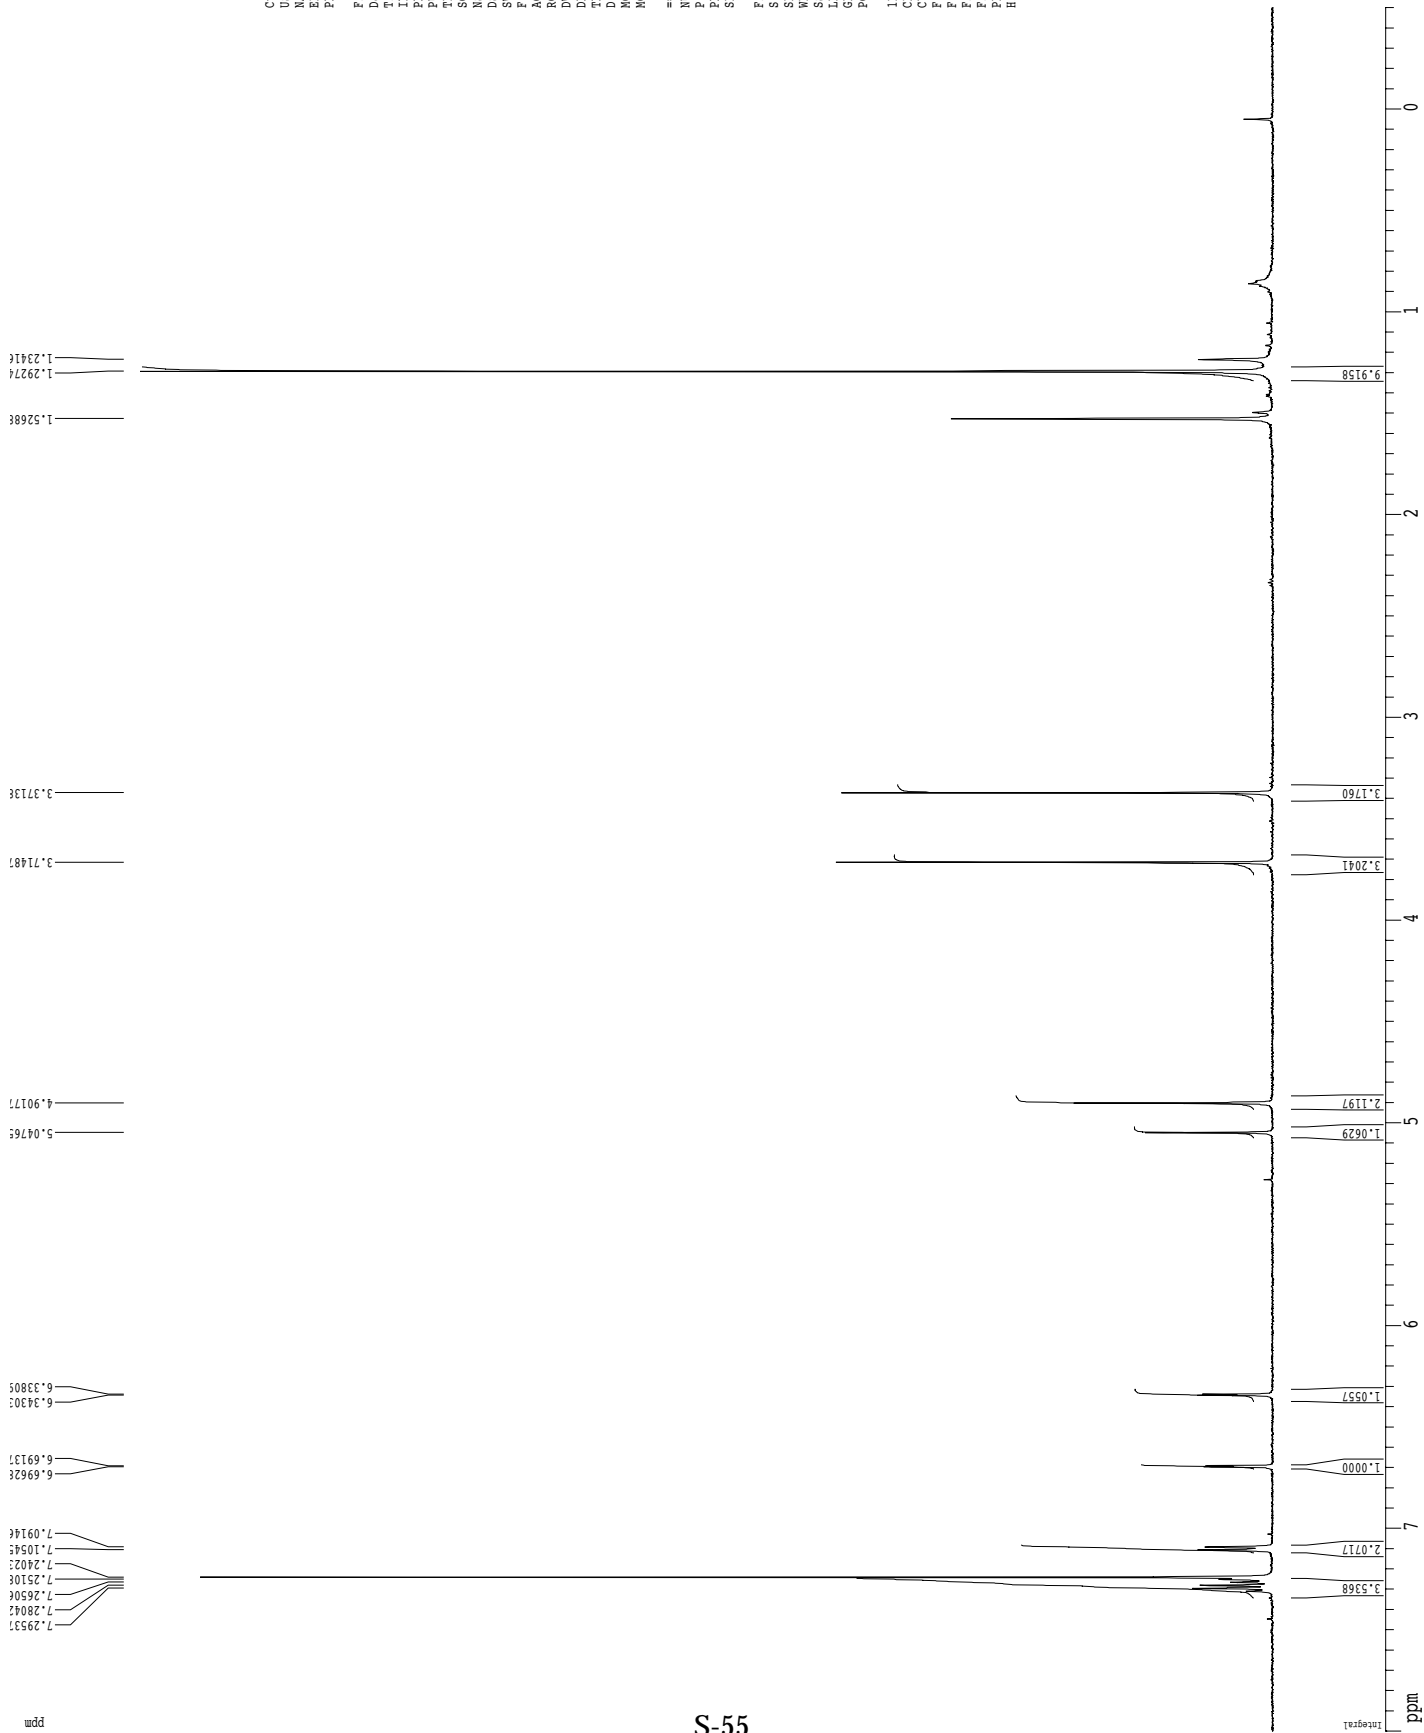





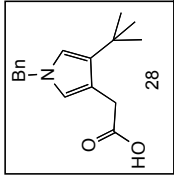

Current Data Parameters  
 USER: schner  
 NAME: ms02-146-3  
 EXPNO: 1  
 PROCNO: 1

F2 - Acquisition Parameters  
 Date\_: 20091026  
 Time: 9:09  
 INSTRUM: cryo500  
 PULPROG: zgpg30  
 PREROG: 5 mm CPXCL  
 TD: 81728  
 SOLVENT: DMSO  
 NS: 12  
 DS: 2  
 SWH: 8012.820 Hz  
 FIDRES: 0.098043 Hz  
 AQ: 5.0998774 sec  
 RG: 12.7  
 DW: 62.400 usec  
 DE: 6.00 usec  
 TE: 298.0 K  
 MCRSTP: 0.1000000 sec  
 MCHNK: 0.01500000 sec

==== CHANNEL f1 =====  
 NUCL: 1H  
 P1: 7.50 usec  
 PL1: 1.60 dB  
 SFO1: 500.2235015 MHz

F2 - Processing parameters  
 SI: 65536  
 SF: 500.2200127 MHz  
 WDW: EM  
 SSB: 0  
 LB: 0.30 Hz  
 GB: 0  
 PC: 4.00

1D NMR plot parameters  
 CX: 22.80 cm  
 CY: 15.00 cm  
 F1P: 13.000 ppm  
 F1: 6502.86 Hz  
 F2P: -1.035 ppm  
 F2: -517.54 Hz  
 PRCH: 0.61355 ppm/cm  
 HZCX: 307.91226 Hz/cm

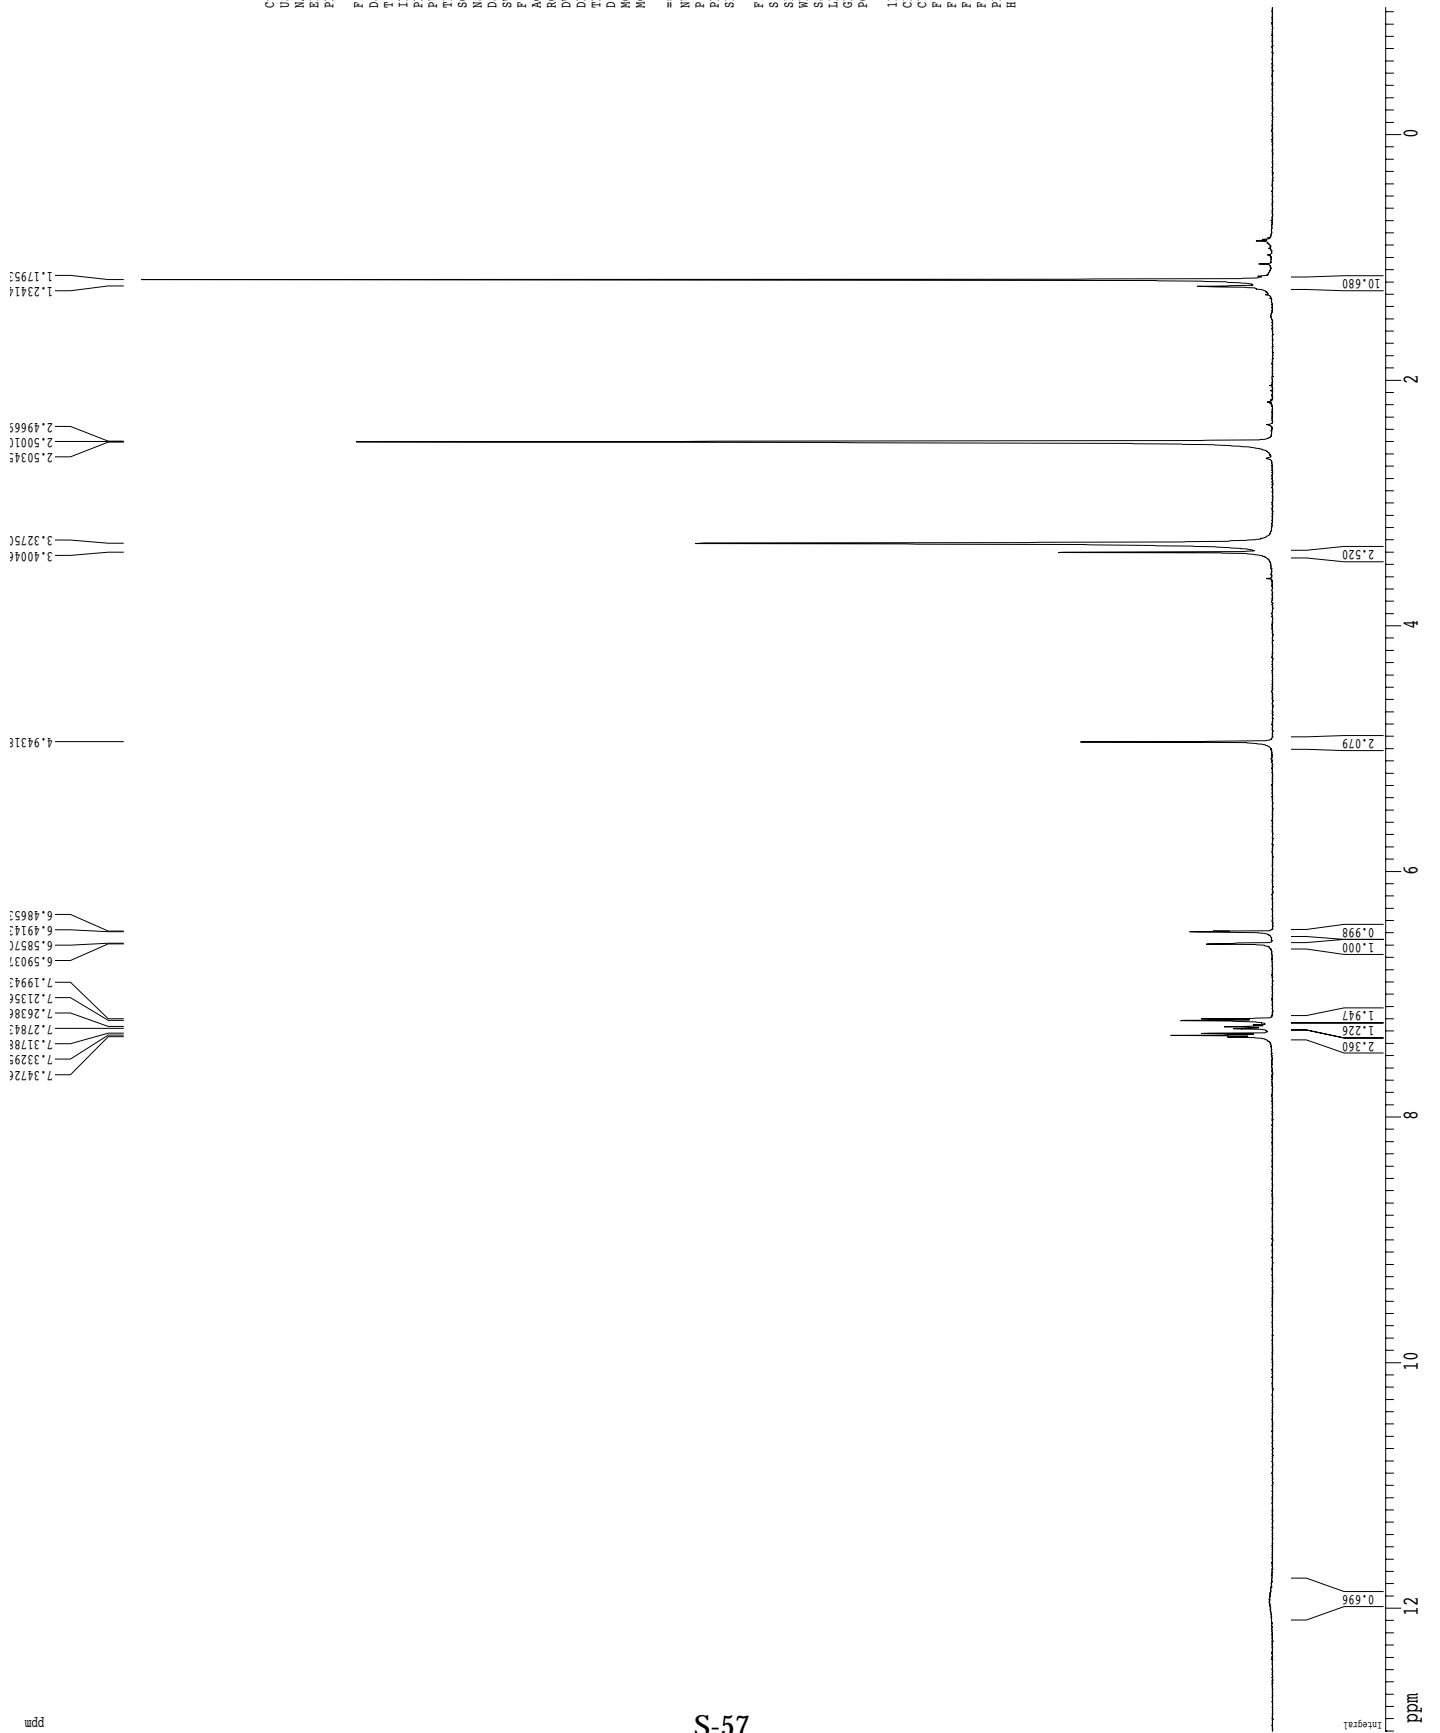

Z-restored spin-echo 13C spectrum with 1H decoupling

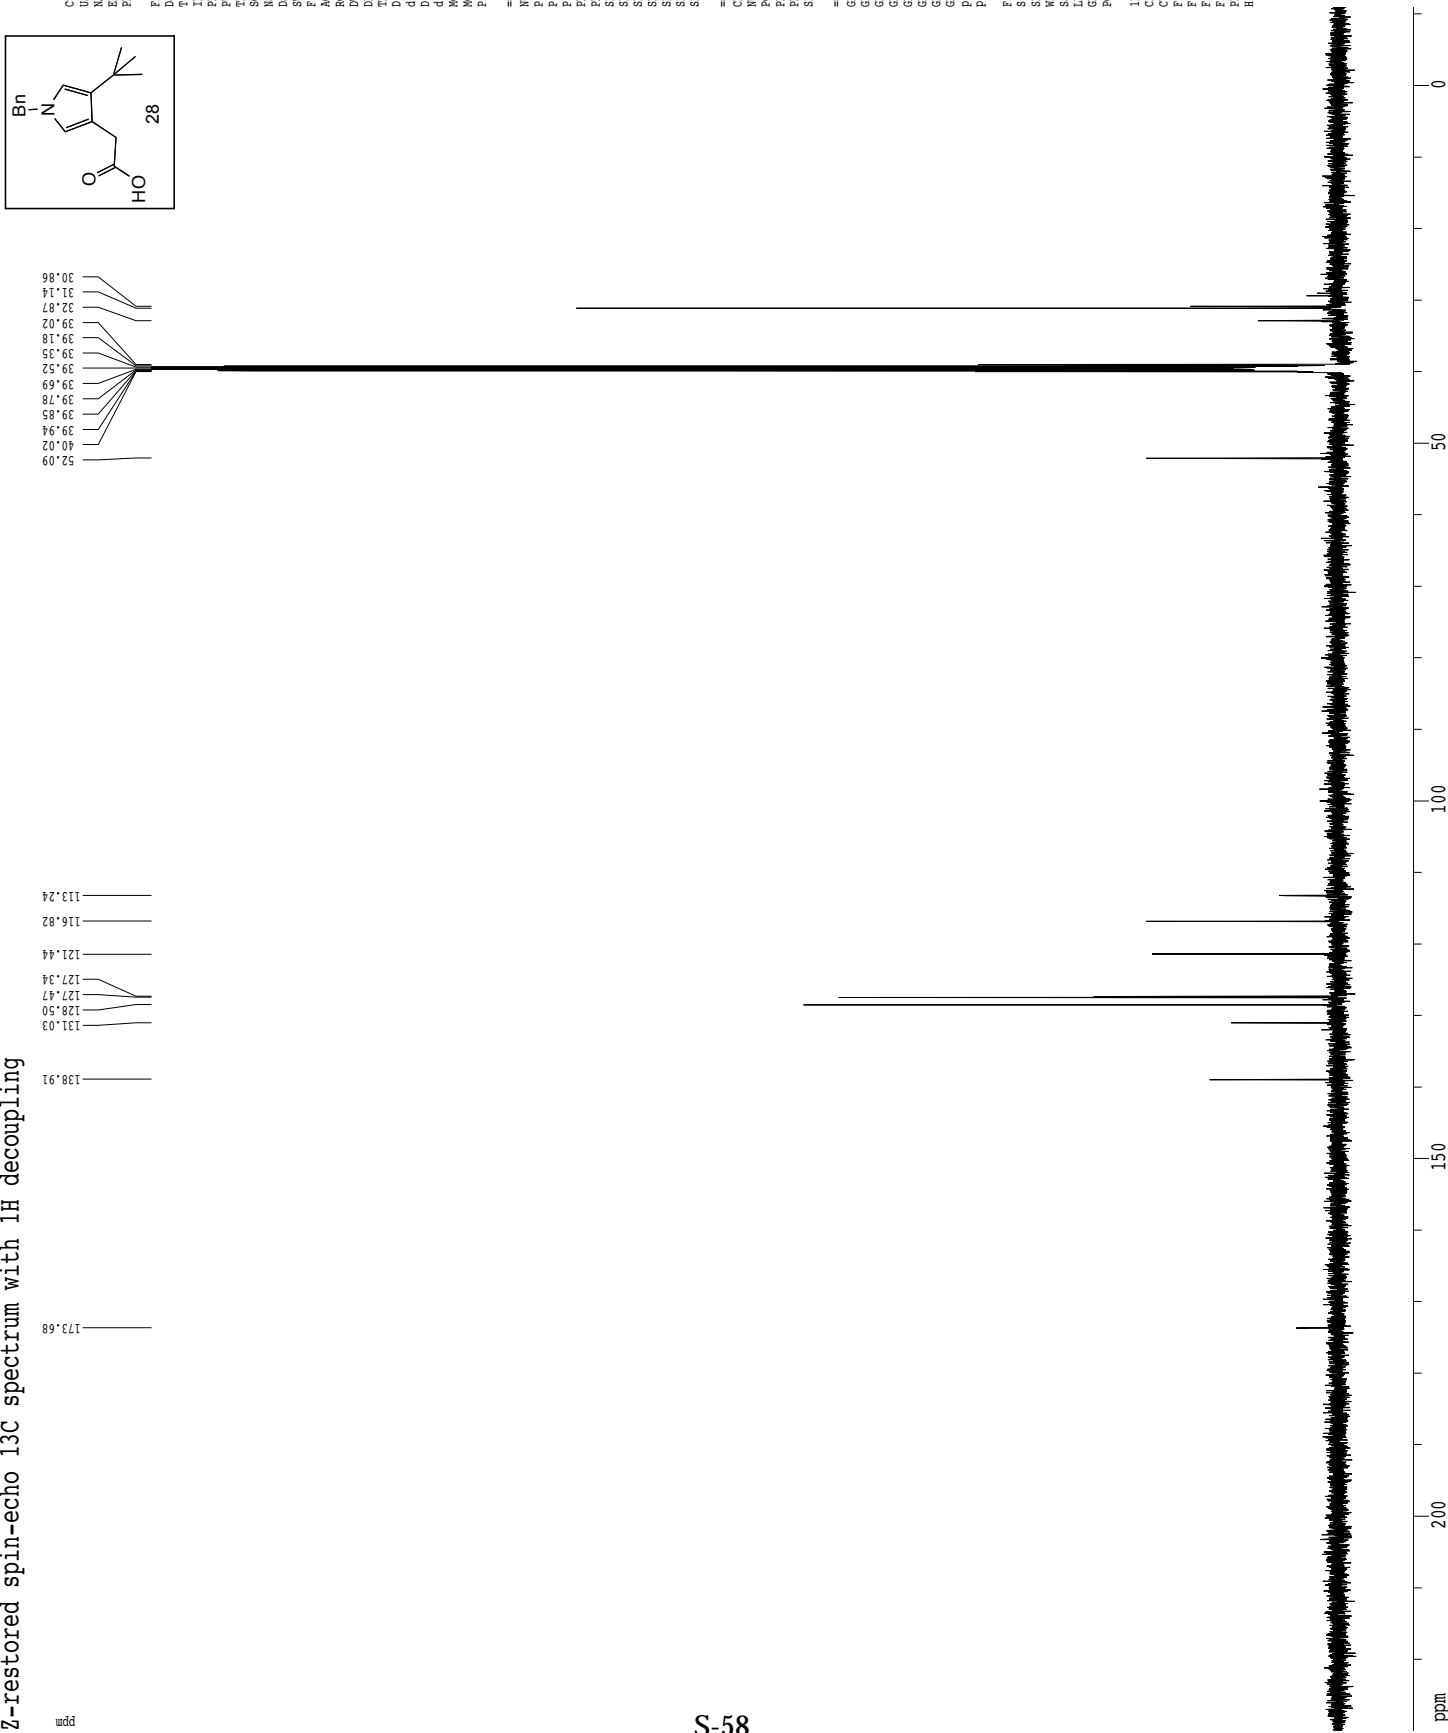

Supplement: 1001421107_Appendix.pdf [file 1001421107_Appendix.pdf]
